# Supplementary material for: Prevalence of hypoxaemia in children with pneumonia in low-income and middle-income countries: a systematic review and meta-analysis
Source: PubMed Central journal article supplement (PMC8864303; doi:10.1016/s2214-109x(21)00586-6), 2022-02-15

# THE LANCET

## Global Health

### Supplementary appendix

This appendix formed part of the original submission and has been peer reviewed. We post it as supplied by the authors.

Supplement to: Rahman AE, Hossain AT, Nair H, et al. Prevalence of hypoxaemia in children with pneumonia in low-income and middle-income countries: a systematic review and meta-analysis. *Lancet Glob Health* 2022; **10**: e348–59.

Supplementary table 1: Detailed search language with keywords and their synonyms

|                             | 1                                                                                                                                                                                                                                                                                  | BO         | 2                                                                                                                                                                                                                                                                                                             | BO         | 3                                                  | BO         | 4                                                                                                                                                                                                                      |
|-----------------------------|------------------------------------------------------------------------------------------------------------------------------------------------------------------------------------------------------------------------------------------------------------------------------------|------------|---------------------------------------------------------------------------------------------------------------------------------------------------------------------------------------------------------------------------------------------------------------------------------------------------------------|------------|----------------------------------------------------|------------|------------------------------------------------------------------------------------------------------------------------------------------------------------------------------------------------------------------------|
|                             | Outcome                                                                                                                                                                                                                                                                            |            | Population                                                                                                                                                                                                                                                                                                    |            | Population                                         |            | Context                                                                                                                                                                                                                |
| <b>Concepts</b>             | hypoxaemia                                                                                                                                                                                                                                                                         |            | pneumonia                                                                                                                                                                                                                                                                                                     |            | children under 5 years of age                      |            | low- and middle-income countries                                                                                                                                                                                       |
| <b>Keywords</b>             | hypoxaemia/<br>hypoxaemia/<br>anoxia/<br>hypoxia/<br>oximetry/<br>oximeter/<br>oximetre/<br>oxymetry/<br>oxymeter/<br>oxymetre/<br>blood oxygen saturation/<br>arterial oxygen saturation/<br>blood gas monitoring/<br>blood gas analysis/<br>analysis blood gas/<br>SpO2/<br>SPO2 | <b>AND</b> | pneumonia/<br>severe pneumonia/<br>severe disease/<br>very severe disease/<br>bronchiolitis/<br>acute respiratory infection/<br>ARI/<br>acute respiratory infections/<br>acute respiratory tract infection/<br>ARTI/<br>acute respiratory tract infections/<br>respiratory illness/<br>respiratory illnesses/ | <b>AND</b> | child*/<br>infant*/<br>pediatric*/<br>paediatric*/ | <b>AND</b> | developing countr*/<br>low-and middle income countr*<br>LMIC*/<br>low income countr*/<br>middle income countr* /<br>lower middle income countr*/<br>upper middle income countr*/<br>'name of the country(appendix-01)' |
| <b>BO: Boolean Operator</b> |                                                                                                                                                                                                                                                                                    |            |                                                                                                                                                                                                                                                                                                               |            |                                                    |            |                                                                                                                                                                                                                        |

### Search Summary-1

Name of the database

MEDLINE (via Ovid)

Date of search

08 October 2021

Timeline

Not applicable

Search Language

| Line # | Theme      | Search Language                                                                                  | Output #                                                                                  |
|--------|------------|--------------------------------------------------------------------------------------------------|-------------------------------------------------------------------------------------------|
| 1      | Hypoxaemia | hypoxemia.mp. or exp Hypoxia/                                                                    | 91820                                                                                     |
| 2      |            | exp Hypoxia/ or hypoxaemia.mp.                                                                   | 84800                                                                                     |
| 3      |            | anoxia.mp. or exp Hypoxia/                                                                       | 87644                                                                                     |
| 4      |            | hypoxia.mp. or exp Hypoxia/                                                                      | 155924                                                                                    |
| 5      |            | oximetry.mp. or exp Oximetry/                                                                    | 19678                                                                                     |
| 6      |            | exp Oximetry/ or oximeter.mp.                                                                    | 16924                                                                                     |
| 7      |            | exp Oximetry/ or oximetre.mp.                                                                    | 15892                                                                                     |
| 8      |            | exp Oximetry/ or oxymetry.mp.                                                                    | 16149                                                                                     |
| 9      |            | exp Oximetry/ or oxymeter.mp.                                                                    | 15980                                                                                     |
| 10     |            | exp Oximetry/ or oxymeter.mp.                                                                    | 15980                                                                                     |
| 11     |            | blood oxygen saturation.mp.                                                                      | 1426                                                                                      |
| 12     |            | arterial oxygen saturation.mp.                                                                   | 4055                                                                                      |
| 13     |            | exp Blood Gas Monitoring, Transcutaneous/ or blood gas monitoring.mp. or exp Blood Gas Analysis/ | 37305                                                                                     |
| 14     |            | blood gas analysis.mp. or exp Blood Gas Analysis/                                                | 40194                                                                                     |
| 15     |            | analysis blood gas.mp. or exp Blood Gas Analysis/                                                | 37226                                                                                     |
| 16     |            | SpO2.mp.                                                                                         | 4886                                                                                      |
| 17     |            | SPO2.mp.                                                                                         | 4886                                                                                      |
| 18     |            |                                                                                                  | 1 or 2 or 3 or 4 or 5 or 6 or 7 or 8 or 9 or 10 or 11 or 12 or 13 or 14 or 15 or 16 or 17 |
| 19     | Pneumonia  | exp Pneumonia, Bacterial/ or exp Pneumonia/ or exp Pneumonia, Viral/ or pneumonia.mp.            | 258674                                                                                    |
| 20     |            | exp Pneumonia, Bacterial/ or exp Pneumonia/ or severe pneumonia.mp. or exp Pneumonia, Viral/     | 205112                                                                                    |
| 21     |            | severe disease.mp.                                                                               | 18122                                                                                     |

|    |                               |                                                                                                                           |         |
|----|-------------------------------|---------------------------------------------------------------------------------------------------------------------------|---------|
| 22 |                               | very severe disease.mp.                                                                                                   | 199     |
| 23 |                               | exp Bronchiolitis Obliterans/ or bronchiolitis.mp. or exp Bronchiolitis/ or exp Bronchiolitis, Viral/                     | 13139   |
| 24 |                               | exp Respiratory Tract Infections/ or acute respiratory infection.mp. or exp Respiratory Syncytial Virus Infections/ ( )   | 482032  |
| 25 |                               | exp Respiratory Tract Infections/ or ARI.mp. ( )                                                                          | 478927  |
| 26 |                               | exp Respiratory Tract Infections/ or acute respiratory infections.mp. or exp Respiratory Syncytial Virus Infections/      | 482231  |
| 27 |                               | exp Respiratory Tract Infections/ or acute respiratory tract infection.mp.                                                | 476982  |
| 28 |                               | exp Respiratory Tract Infections/ or ARTI.mp.                                                                             | 478414  |
| 29 |                               | exp Respiratory Tract Infections/ or acute respiratory tract infections.mp.                                               | 477025  |
| 30 |                               | exp Respiratory Tract Infections/ or respiratory illness.mp. or exp Respiratory Tract Diseases/                           | 1511022 |
| 31 |                               | exp Respiratory Tract Infections/ or respiratory illnesses.mp. or exp Respiratory Tract Diseases/                         | 1510299 |
| 32 |                               | 19 or 20 or 21 or 22 or 23 or 24 or 25 or 26 or 27 or 28 or 29 or 30 or 31                                                | 1565662 |
| 33 | Children under-5 years of age | Child.mp. or exp Child Health Services/ or exp Child Care/ or exp Child, Hospitalized/ or exp Child/ or exp Child Health/ | 2175248 |
| 34 |                               | Children.mp. or exp Child/                                                                                                | 2200753 |
| 35 |                               | Infant.mp. or exp Infant Care/ or exp Infant Health/ or exp Infant/                                                       | 1230190 |
| 36 |                               | Infants.mp. or exp Infant/                                                                                                | 1226015 |
| 37 |                               | Pediatric.mp. or exp Pediatrics/                                                                                          | 320962  |
| 38 |                               | Pediatrics.mp. or exp Pediatrics/                                                                                         | 82943   |
| 39 |                               | exp Child/ or exp Child, Preschool/ or Paediatric.mp.                                                                     | 2022745 |
| 40 |                               | exp Child/ or exp Child, Preschool/ or Paediatrics.mp.                                                                    | 2012017 |
| 41 |                               | 33 or 34 or 35 or 36 or 37 or 38 or 39 or 40                                                                              | 2914291 |
| 42 |                               | 18 and 32 and 41                                                                                                          | 7758    |
| 43 | Low and Middle Income country | exp Developing Countries/ or developing countr*.mp.                                                                       | 122287  |
| 44 |                               | exp Developing Countries/ or low-and middle income country.mp.                                                            | 78317   |

|    |                                                                                                                                                                                                                                                                                                                  |        |
|----|------------------------------------------------------------------------------------------------------------------------------------------------------------------------------------------------------------------------------------------------------------------------------------------------------------------|--------|
| 45 | exp Developing Countries/ or low-and middle income countries.mp.                                                                                                                                                                                                                                                 | 86721  |
| 46 | exp Developing Countries/ or LMIC*.mp.                                                                                                                                                                                                                                                                           | 80240  |
| 47 | exp Developing Countries/ or low income country.mp.                                                                                                                                                                                                                                                              | 78344  |
| 48 | exp Developing Countries/ or middle income country.mp.                                                                                                                                                                                                                                                           | 79281  |
| 49 | exp Developing Countries/ or low income countries.mp.                                                                                                                                                                                                                                                            | 81795  |
| 50 | exp Developing Countries/ or middle income countries.mp.                                                                                                                                                                                                                                                         | 88815  |
| 51 | exp Developing Countries/ or lower middle income country.mp.                                                                                                                                                                                                                                                     | 77958  |
| 52 | exp Developing Countries/ or lower middle income countries.mp.                                                                                                                                                                                                                                                   | 78135  |
| 53 | exp Developing Countries/ or upper middle income countries.mp.                                                                                                                                                                                                                                                   | 77998  |
| 54 | exp Developing Countries/ or upper middle income country.mp.                                                                                                                                                                                                                                                     | 77880  |
| 55 | Afghanistan.mp. or exp Afghanistan/                                                                                                                                                                                                                                                                              | 6592   |
| 56 | Albania.mp. or exp Albania/                                                                                                                                                                                                                                                                                      | 1248   |
| 57 | Albania.mp. or exp Albania/                                                                                                                                                                                                                                                                                      | 1248   |
| 58 | American Samoa.mp. or exp American Samoa/                                                                                                                                                                                                                                                                        | 376    |
| 59 | Angola.mp. or exp Angola/ ( )                                                                                                                                                                                                                                                                                    | 1583   |
| 60 | Armenia.mp. or exp Armenia/                                                                                                                                                                                                                                                                                      | 1842   |
| 61 | Azerbaijan.mp. or exp Azerbaijan/                                                                                                                                                                                                                                                                                | 1762   |
| 62 | Bangladesh.mp. or exp Bangladesh/                                                                                                                                                                                                                                                                                | 15112  |
| 63 | Belarus.mp. or exp "Republic of Belarus"/                                                                                                                                                                                                                                                                        | 2679   |
| 64 | Belize.mp. or exp Belize/                                                                                                                                                                                                                                                                                        | 886    |
| 65 | Benin.mp. or exp Benin/                                                                                                                                                                                                                                                                                          | 3688   |
| 66 | Bhutan.mp. or exp Bhutan/                                                                                                                                                                                                                                                                                        | 809    |
| 67 | Bolivia.mp. or exp Bolivia/                                                                                                                                                                                                                                                                                      | 3888   |
| 68 | (Bosnia and Herzegovina).mp. [mp=title, abstract, original title, name of substance word, subject heading word, floating sub-heading word, keyword heading word, organism supplementary concept word, protocol supplementary concept word, rare disease supplementary concept word, unique identifier, synonyms] | 2655   |
| 69 | Botswana.mp. or exp Botswana/                                                                                                                                                                                                                                                                                    | 2537   |
| 70 | Brazil.mp. or exp Brazil/                                                                                                                                                                                                                                                                                        | 123075 |
| 71 | Bulgaria.mp. or exp Bulgaria/                                                                                                                                                                                                                                                                                    | 7816   |

|     |                                                                    |        |
|-----|--------------------------------------------------------------------|--------|
| 72  | Burkina Faso.mp. or exp Burkina Faso/                              | 4440   |
| 73  | Burundi.mp. or exp Burundi/                                        | 956    |
| 74  | Cabo Verde.mp. or exp Cabo Verde/ ( )                              | 285    |
| 75  | Cambodia.mp. or exp Cambodia/ ( )                                  | 4644   |
| 76  | Cameroon.mp. or exp Cameroon/ ( )                                  | 7506   |
| 77  | Central African Republic.mp. or exp Central African Republic/      | 1169   |
| 78  | Chad.mp. or exp Chad/                                              | 1276   |
| 79  | China.mp. or exp China/                                            | 276588 |
| 80  | Colombia.mp. or exp Colombia/                                      | 14863  |
| 81  | Comoros.mp. or exp Comoros/                                        | 508    |
| 82  | exp "Democratic Republic of the Congo"/ or DRC.mp.                 | 5714   |
| 83  | Congo.mp. or exp Congo/ or exp "Democratic Republic of the Congo"/ | 14858  |
| 84  | Costa Rica.mp. or exp Costa Rica/                                  | 5210   |
| 85  | Ivory Coast.mp. or exp Cote d'Ivoire/                              | 3830   |
| 86  | Cuba.mp. or exp Cuba/                                              | 6536   |
| 87  | Djibouti.mp. or exp Djibouti/                                      | 425    |
| 88  | Dominica.mp. or exp Dominica/                                      | 445    |
| 89  | Dominican Republic.mp. or exp Dominican Republic/                  | 2294   |
| 90  | Ecuador.mp. or exp Ecuador/                                        | 5474   |
| 91  | exp Egypt/ or Egypt.mp.                                            | 20542  |
| 92  | El Salvador.mp. or exp El Salvador/                                | 1403   |
| 93  | Equatorial Guinea.mp. or exp Equatorial Guinea/                    | 476    |
| 94  | Eritrea.mp. or exp Eritrea/                                        | 610    |
| 95  | Ethiopia.mp. or exp Ethiopia/                                      | 16915  |
| 96  | Fiji.mp. or exp Fiji/                                              | 1833   |
| 97  | Gabon.mp. or exp Gabon/                                            | 2075   |
| 98  | Gambia.mp. or exp Gambia/                                          | 3147   |
| 99  | exp "Georgia (Republic)"/ or Georgia.mp.                           | 16712  |
| 100 | Ghana.mp. or exp Ghana/                                            | 11187  |
| 101 | Grenada.mp. or exp Grenada/                                        | 325    |
| 102 | Guatemala.mp. or exp Guatemala/                                    | 4218   |
| 103 | Guinea.mp. or exp Guinea/                                          | 160323 |
| 104 | Guinea-Bissau.mp. or exp Guinea-Bissau/                            | 1223   |
| 105 | Guyana.mp. or exp Guyana/                                          | 1181   |
| 106 | Haiti.mp. or exp Haiti/                                            | 4001   |
| 107 | Honduras.mp. or exp Honduras/                                      | 1895   |
| 108 | India.mp. or exp India/                                            | 131814 |
| 109 | Indonesia.mp. or exp Indonesia/                                    | 15431  |

|     |                                                                                                     |       |
|-----|-----------------------------------------------------------------------------------------------------|-------|
| 110 | Iran.mp. or exp Iran/                                                                               | 36150 |
| 111 | exp Iraq/ or Iraq.mp.                                                                               | 9595  |
| 112 | Jamaica.mp. or exp Jamaica/                                                                         | 4338  |
| 113 | Jordan.mp. or exp Jordan/                                                                           | 6664  |
| 114 | Kazakhstan.mp. or exp Kazakhstan/ (                                                                 | 3461  |
| 115 | Kenya.mp. or exp Kenya/                                                                             | 21100 |
| 116 | Kiribati.mp. or exp Micronesia/                                                                     | 2160  |
| 117 | exp Korea/ or Korea.mp. or exp "Democratic People's Republic of Korea"/ or exp "Republic of Korea"/ | 64323 |
| 118 | Kosovo.mp. or exp Kosovo/                                                                           | 840   |
| 119 | exp Kyrgyzstan/ or Kyrgyz.mp.                                                                       | 1397  |
| 120 | Lao.mp. or exp Laos/                                                                                | 3050  |
| 121 | Lebanon.mp. or exp Lebanon/                                                                         | 5871  |
| 122 | Lesotho.mp. or exp Lesotho/ ( )                                                                     | 720   |
| 123 | Liberia.mp. or exp Liberia/ ( )                                                                     | 1809  |
| 124 | Libya.mp. or exp Libya/                                                                             | 1526  |
| 125 | exp "Macedonia (Republic)"/ or Macedonia.mp. ( )                                                    | 1212  |
| 126 | Madagascar.mp. or exp Madagascar/                                                                   | 5100  |
| 127 | Malawi.mp. or exp Malawi/                                                                           | 7388  |
| 128 | Malaysia.mp. or exp Malaysia/                                                                       | 20092 |
| 129 | Maldives.mp. or exp Indian Ocean Islands/                                                           | 12867 |
| 130 | Mali.mp. or exp Mali/                                                                               | 3870  |
| 131 | Marshall Islands.mp. or exp Micronesia/                                                             | 2167  |
| 132 | Mauritania.mp. or exp Mauritania/                                                                   | 699   |
| 133 | Mauritius.mp. or exp Mauritius/                                                                     | 985   |
| 134 | exp Mexico/ or Mexico.mp.                                                                           | 57909 |
| 135 | Micronesia.mp. or exp Micronesia/                                                                   | 2419  |
| 136 | Moldova.mp. or exp Moldova/                                                                         | 1012  |
| 137 | Mongolia.mp. or exp Mongolia/                                                                       | 4370  |
| 138 | Montenegro.mp. or exp Montenegro/                                                                   | 799   |
| 139 | Morocco.mp. or exp Morocco/                                                                         | 7636  |
| 140 | Mozambique.mp. or exp Mozambique/                                                                   | 3784  |
| 141 | Myanmar.mp. or exp Myanmar/                                                                         | 4020  |
| 142 | Namibia.mp. or exp Namibia/                                                                         | 1713  |
| 143 | Nauru.mp. or exp Micronesia/                                                                        | 2141  |
| 144 | Nepal.mp. or exp Nepal/                                                                             | 11131 |
| 145 | Nicaragua.mp. or exp Nicaragua/                                                                     | 2083  |
| 146 | exp Niger/ or Niger.mp.                                                                             | 12614 |
| 147 | exp Niger/ or Niger.mp.                                                                             | 12614 |
| 148 | Nigeria.mp. or exp Nigeria/                                                                         | 34325 |

|     |                                                                                                                                                                                                                                                                                                                      |       |
|-----|----------------------------------------------------------------------------------------------------------------------------------------------------------------------------------------------------------------------------------------------------------------------------------------------------------------------|-------|
| 149 | Pakistan.mp. or exp Pakistan/                                                                                                                                                                                                                                                                                        | 23756 |
| 150 | Papua New Guinea.mp. or exp Papua New Guinea/                                                                                                                                                                                                                                                                        | 5174  |
| 151 | Paraguay.mp. or exp Paraguay/                                                                                                                                                                                                                                                                                        | 1603  |
| 152 | Peru.mp. or exp Peru/                                                                                                                                                                                                                                                                                                | 12821 |
| 153 | Philippines.mp. or exp Philippines/                                                                                                                                                                                                                                                                                  | 11581 |
| 154 | Romania.mp. or exp Romania/                                                                                                                                                                                                                                                                                          | 12371 |
| 155 | exp Russia/ or Russia.mp.                                                                                                                                                                                                                                                                                            | 65165 |
| 156 | Rwanda.mp. or exp Rwanda/                                                                                                                                                                                                                                                                                            | 3437  |
| 157 | exp Samoa/ or Samoa.mp. or exp "Independent State of Samoa"/                                                                                                                                                                                                                                                         | 1107  |
| 158 | Timor.mp.                                                                                                                                                                                                                                                                                                            | 662   |
| 159 | Senegal.mp. or exp Senegal/                                                                                                                                                                                                                                                                                          | 7527  |
| 160 | Serbia.mp. or exp Serbia/ ( )                                                                                                                                                                                                                                                                                        | 5193  |
| 161 | Sierra Leone.mp. or exp Sierra Leone/ ( )                                                                                                                                                                                                                                                                            | 2347  |
| 162 | Solomon Islands.mp. or exp Melanesia/ ( )                                                                                                                                                                                                                                                                            | 6994  |
| 163 | Somalia.mp. or exp Somalia/                                                                                                                                                                                                                                                                                          | 2259  |
| 164 | South Africa.mp. or exp South Africa/                                                                                                                                                                                                                                                                                | 52109 |
| 165 | exp Sudan/ or exp South Sudan/ or Sudan.mp.                                                                                                                                                                                                                                                                          | 8651  |
| 166 | Sri Lanka.mp. or exp Sri Lanka/                                                                                                                                                                                                                                                                                      | 8063  |
| 167 | Saint Lucia.mp. or exp Saint Lucia/                                                                                                                                                                                                                                                                                  | 121   |
| 168 | (Vincent and the Grenadines).mp. [mp=title, abstract, original title, name of substance word, subject heading word, floating sub-heading word, keyword heading word, organism supplementary concept word, protocol supplementary concept word, rare disease supplementary concept word, unique identifier, synonyms] | 8651  |
| 169 | exp Sudan/ or Sudan.mp.                                                                                                                                                                                                                                                                                              | 1168  |
| 170 | Suriname.mp. or exp Suriname/                                                                                                                                                                                                                                                                                        | 921   |
| 171 | Swaziland.mp. or exp Swaziland/                                                                                                                                                                                                                                                                                      | 2927  |
| 172 | Syria.mp. or exp Syria/                                                                                                                                                                                                                                                                                              | 999   |
| 173 | Tajikistan.mp. or exp Tajikistan/                                                                                                                                                                                                                                                                                    | 14642 |
| 174 | Tanzania.mp. or exp Tanzania/                                                                                                                                                                                                                                                                                        | 35246 |
| 175 | Thailand.mp. or exp Thailand/                                                                                                                                                                                                                                                                                        | 399   |
| 176 | Timor-Leste.mp. or exp Timor-Leste/                                                                                                                                                                                                                                                                                  | 1678  |
| 177 | Togo.mp. or exp Togo/                                                                                                                                                                                                                                                                                                | 451   |
| 178 | Tonga.mp. or exp Tonga/                                                                                                                                                                                                                                                                                              | 90    |
| 179 | Tunisia.mp. or Tunisia/                                                                                                                                                                                                                                                                                              | 10240 |
| 180 | exp Turkey/ or Turkey.mp. ( )                                                                                                                                                                                                                                                                                        | 52290 |
| 181 | Turkmenistan.mp. or exp Turkmenistan/ ( )                                                                                                                                                                                                                                                                            | 747   |
| 182 | Tuvalu.mp. ( )                                                                                                                                                                                                                                                                                                       | 65    |



|     |  |                                                                                                                                                                                                                                                                                                                                                                                                                                                                                                                                                                                                                                                                                                                                                                                                                                                                                                                                                       |         |
|-----|--|-------------------------------------------------------------------------------------------------------------------------------------------------------------------------------------------------------------------------------------------------------------------------------------------------------------------------------------------------------------------------------------------------------------------------------------------------------------------------------------------------------------------------------------------------------------------------------------------------------------------------------------------------------------------------------------------------------------------------------------------------------------------------------------------------------------------------------------------------------------------------------------------------------------------------------------------------------|---------|
| 183 |  | Uganda.mp. or exp Uganda/                                                                                                                                                                                                                                                                                                                                                                                                                                                                                                                                                                                                                                                                                                                                                                                                                                                                                                                             | 16034   |
| 184 |  | Ukraine.mp. or exp Ukraine/ ()                                                                                                                                                                                                                                                                                                                                                                                                                                                                                                                                                                                                                                                                                                                                                                                                                                                                                                                        | 17586   |
| 185 |  | Uzbekistan.mp. or exp Uzbekistan/ ()                                                                                                                                                                                                                                                                                                                                                                                                                                                                                                                                                                                                                                                                                                                                                                                                                                                                                                                  | 2255    |
| 186 |  | Vanuatu.mp. or exp Vanuatu/ ()                                                                                                                                                                                                                                                                                                                                                                                                                                                                                                                                                                                                                                                                                                                                                                                                                                                                                                                        | 672     |
| 187 |  | Venezuela.mp. or exp Venezuela/                                                                                                                                                                                                                                                                                                                                                                                                                                                                                                                                                                                                                                                                                                                                                                                                                                                                                                                       | 6794    |
| 188 |  | exp Vietnam/ or Vietnam.mp.                                                                                                                                                                                                                                                                                                                                                                                                                                                                                                                                                                                                                                                                                                                                                                                                                                                                                                                           | 17976   |
| 189 |  | (West Bank and Gaza).mp. [mp=title, abstract, original title, name of substance word, subject heading word, floating sub-heading word, keyword heading word, organism supplementary concept word, protocol supplementary concept word, rare disease supplementary concept word, unique identifier, synonyms] ()                                                                                                                                                                                                                                                                                                                                                                                                                                                                                                                                                                                                                                       | 205     |
| 190 |  | Yemen.mp. or exp Yemen/                                                                                                                                                                                                                                                                                                                                                                                                                                                                                                                                                                                                                                                                                                                                                                                                                                                                                                                               | 2008    |
| 191 |  | Zambia.mp. or exp Zambia/                                                                                                                                                                                                                                                                                                                                                                                                                                                                                                                                                                                                                                                                                                                                                                                                                                                                                                                             | 6101    |
| 192 |  | Zimbabwe.mp. or exp Zimbabwe/                                                                                                                                                                                                                                                                                                                                                                                                                                                                                                                                                                                                                                                                                                                                                                                                                                                                                                                         | 7411    |
| 193 |  | 43 or 44 or 45 or 46 or 47 or 48 or 49 or 50 or 51 or 52 or 53 or 54                                                                                                                                                                                                                                                                                                                                                                                                                                                                                                                                                                                                                                                                                                                                                                                                                                                                                  | 138004  |
| 194 |  | 55 or 56 or 57 or 58 or 59 or 60 or 61 or 62 or 63 or 64 or 65 or 66 or 67 or 68 or 69 or 70 or 71 or 72 or 73 or 74 or 75 or 76 or 77 or 78 or 79 or 80 or 81 or 82 or 83 or 84 or 85 or 86 or 87 or 88 or 89 or 90 or 91 or 92 or 93 or 94 or 95 or 96 or 97 or 98 or 99 or 100 or 101 or 102 or 103 or 104 or 105 or 106 or 107 or 108 or 109 or 110 or 111 or 112 or 113 or 114 or 115 or 116 or 117 or 118 or 119 or 120 or 121 or 122 or 123 or 124 or 125 or 126 or 127 or 128 or 129 or 130 or 131 or 132 or 133 or 134 or 135 or 136 or 137 or 138 or 139 or 140 or 141 or 142 or 143 or 144 or 145 or 146 or 147 or 148 or 149 or 150 or 151 or 152 or 153 or 154 or 155 or 156 or 157 or 158 or 159 or 160 or 161 or 162 or 163 or 164 or 165 or 166 or 167 or 168 or 169 or 170 or 171 or 172 or 173 or 174 or 175 or 176 or 177 or 178 or 179 or 180 or 181 or 182 or 183 or 184 or 185 or 186 or 187 or 188 or 189 or 190 or 191 or 192 | 1530131 |
| 195 |  | 193 or 194                                                                                                                                                                                                                                                                                                                                                                                                                                                                                                                                                                                                                                                                                                                                                                                                                                                                                                                                            | 1590932 |
| 196 |  | 18 and 32 and 41 and 195                                                                                                                                                                                                                                                                                                                                                                                                                                                                                                                                                                                                                                                                                                                                                                                                                                                                                                                              | 425     |

Final search output: 425

## Search Summary-2

Name of the database

EMBASE (via Ovid)

Date of search

08 October 2021

Timeline

Not applicable

Search Language

| Line # | Theme      | Search Language                                                                                                           | Output # |
|--------|------------|---------------------------------------------------------------------------------------------------------------------------|----------|
| 1.     | Hypoxaemia | hypoxemia.mp. or exp hypoxemia                                                                                            | 185053   |
| 2.     |            | hypoxaemia.mp. or exp hypoxemia                                                                                           | 179756   |
| 3.     |            | anoxia.mp. or exp anoxia                                                                                                  | 18565    |
| 4.     |            | hypoxia.mp. or exp hypoxia                                                                                                | 220645   |
| 5.     |            | exp pulse oximetry/ or exp oximetry/ or oximetry.mp.                                                                      | 32644    |
| 6.     |            | oximeter.mp. or exp pulse oximeter/ or exp oximeter                                                                       | 9570     |
| 7.     |            | exp pulse oximeter/ or oximetre.mp.                                                                                       | 4696     |
| 8.     |            | oxymetry.mp. or exp oximetry                                                                                              | 29785    |
| 9.     |            | oxymeter.mp. or exp oximeter                                                                                              | 7032     |
| 10.    |            | oxymetre.mp.                                                                                                              | 10       |
| 11.    |            | blood oxygen saturation.mp. or exp blood oxygen tension/ or exp oxygen blood level                                        | 13047    |
| 12.    |            | arterial oxygen saturation.mp. or exp arterial oxygen saturation/ or exp arterial oxygen tension                          | 23200    |
| 13.    |            | exp arterial oxygen tension/ or exp arterial gas/ or exp blood gas analysis/ or exp blood gas/ or blood gas monitoring.mp | 96898    |

|     |           |                                                                                                                                                                              |        |
|-----|-----------|------------------------------------------------------------------------------------------------------------------------------------------------------------------------------|--------|
| 14. |           | blood gas analysis.mp. or exp blood gas analysis                                                                                                                             | 26011  |
| 15. |           | exp arterial gas/ or exp blood gas analysis/ or analysis blood gas.mp. or exp blood gas                                                                                      | 96821  |
| 16. |           | exp arterial oxygen saturation/ or exp oxygen saturation/ or exp pulse oximetry/ or SpO2.mp. or exp oximetry                                                                 | 98190  |
| 17. |           | exp arterial oxygen saturation/ or exp oxygen saturation/ or exp pulse oximetry/ or SPO2.mp. or exp oximetry                                                                 | 98190  |
| 18. |           | 1 or 2 or 3 or 4 or 5 or 6 or 7 or 8 or 9 or 10 or 11 or 12 or 13 or 14 or 15 or 16 or 17                                                                                    | 419024 |
| 19. | Pneumonia | exp pneumonia/ or exp bacterial pneumonia/ or pneumonia.mp. or exp virus pneumonia                                                                                           | 378952 |
| 20. |           | exp pneumonia/ or severe pneumonia.mp. or exp bacterial pneumonia                                                                                                            | 335707 |
| 21. |           | severe disease.mp.                                                                                                                                                           | 32437  |
| 22. |           | very severe disease.mp.                                                                                                                                                      | 386    |
| 23. |           | bronchiolitis.mp. or exp bronchiolitis/ or exp viral bronchiolitis/ or exp bronchiolitis obliterans organizing pneumonia                                                     | 26335  |
| 24. |           | acute respiratory infection.mp. or exp respiratory tract infection                                                                                                           | 422221 |
| 25. |           | exp pneumonia/ or exp respiratory tract infection/ or ARI.mp.                                                                                                                | 623374 |
| 26. |           | acute respiratory infections.mp. or exp respiratory tract infection                                                                                                          | 422453 |
| 27. |           | acute respiratory tract infection.mp. or exp respiratory tract infection                                                                                                     | 421869 |
| 28. |           | exp respiratory tract infection/ or ARTI.mp                                                                                                                                  | 422904 |
| 29. |           | acute respiratory tract infections.mp. or exp respiratory tract infection                                                                                                    | 421932 |
| 30. |           | respiratory tract disease/ or exp acute respiratory tract disease/ or exp respiratory tract infection/ or exp upper respiratory tract congestion/ or respiratory illness.mp. | 478690 |
| 31. |           | respiratory tract disease/ or exp acute respiratory tract disease/ or exp respiratory tract infection/ or exp                                                                | 477203 |

|     |                                                                                                           |                                                                                                                                      |                                                   |
|-----|-----------------------------------------------------------------------------------------------------------|--------------------------------------------------------------------------------------------------------------------------------------|---------------------------------------------------|
|     |                                                                                                           | upper respiratory tract congestion/ or respiratory illnesses.mp.                                                                     |                                                   |
| 32. |                                                                                                           | 19 or 20 or 21 or 22 or 23 or 24 or 25 or 26 or 27 or 28 or 29 or 30 or 31                                                           | 757123                                            |
| 33. | children under 5 years of age                                                                             | exp hospitalized child/ or child*.mp. or exp child care/ or exp child hospitalization/ or exp child health/ or exp child health care | 274980<br>1                                       |
| 34. |                                                                                                           | exp hospitalized child/ or child*.mp. or exp child hospitalization/ or exp child health/ or exp child health care                    | 274693<br>3                                       |
| 35. |                                                                                                           | exp infant care/ or exp hospitalized infant/ or infant*.mp.                                                                          | 868324                                            |
| 36. |                                                                                                           | exp infant care/ or exp hospitalized infant/ or infant*.mp.                                                                          | 868324                                            |
| 37. |                                                                                                           | Pediatric.mp. or exp pediatrics                                                                                                      | 575529                                            |
| 38. |                                                                                                           | Pediatrics.mp. or exp pediatrics                                                                                                     | 154873                                            |
| 39. |                                                                                                           | Paediatric.mp. or exp pediatrics                                                                                                     | 208410                                            |
| 40. |                                                                                                           | Paediatrics.mp. or exp pediatrics                                                                                                    | 118440                                            |
| 41. |                                                                                                           | 33 or 34 or 35 or 36 or 37 or 38 or 39 or 40                                                                                         | 320399<br>7                                       |
| 42. |                                                                                                           | Low and Middle Income Country                                                                                                        | exp developing country/ or developing countr*.mp. |
| 43. | low-and middle income countr*.mp.                                                                         |                                                                                                                                      | 22831                                             |
| 44. | exp middle income country/ or LMIC*.mp. or exp developing country                                         |                                                                                                                                      | 109400                                            |
| 45. | exp middle income country/ or exp low income country/ or low income countr*.mp. or exp developing country |                                                                                                                                      | 114651                                            |
| 46. | low income country/ or exp middle income country/ or exp developing country/ or middle income countr*.mp. |                                                                                                                                      | 124293                                            |
| 47. | exp developing country/ or exp low income country/ or lower middle income countr*.mp.                     |                                                                                                                                      | 102519                                            |

|     |                                                                                                                                                                                                                     |        |
|-----|---------------------------------------------------------------------------------------------------------------------------------------------------------------------------------------------------------------------|--------|
| 48. | upper middle income countr*.mp.                                                                                                                                                                                     | 661    |
| 49. | Afghanistan.mp. or exp Afghanistan                                                                                                                                                                                  | 9229   |
| 50. | Albania.mp. or exp Albania                                                                                                                                                                                          | 2326   |
| 51. | American Samoa.mp. or exp American Samoa                                                                                                                                                                            | 470    |
| 52. | Angola.mp. or exp Angola                                                                                                                                                                                            | 1968   |
| 53. | Armenia.mp. or exp Armenia                                                                                                                                                                                          | 2288   |
| 54. | Azerbaijan.mp. or exp Azerbaijan                                                                                                                                                                                    | 2495   |
| 55. | Bangladesh.mp. or exp Bangladesh                                                                                                                                                                                    | 22201  |
| 56. | Belarus.mp. or exp Belarus                                                                                                                                                                                          | 3346   |
| 57. | Belize.mp. or exp Belize                                                                                                                                                                                            | 1098   |
| 58. | Benin.mp. or exp Benin                                                                                                                                                                                              | 5566   |
| 59. | Bhutan.mp. or exp Bhutan                                                                                                                                                                                            | 1185   |
| 60. | Bolivia.mp. or exp Bolivia                                                                                                                                                                                          | 4793   |
| 61. | (Bosnia and Herzegovina).mp. [mp=title, abstract, heading word, drug trade name, original title, device manufacturer, drug manufacturer, device trade name, keyword, floating subheading word, candidate term word] | 3562   |
| 62. | Botswana.mp. or exp Botswana                                                                                                                                                                                        | 3454   |
| 63. | exp Brazil/ or Brazil.mp.                                                                                                                                                                                           | 156620 |
| 64. | Bulgaria.mp. or exp Bulgaria                                                                                                                                                                                        | 9681   |
| 65. | Burkina Faso.mp. or exp Burkina Faso                                                                                                                                                                                | 5913   |
| 66. | Burundi.mp. or exp Burundi                                                                                                                                                                                          | 1173   |
| 67. | Cabo Verde.mp. or exp Cape Verde                                                                                                                                                                                    | 479    |
| 68. | Cambodia.mp. or exp Cambodia                                                                                                                                                                                        | 6483   |
| 69. | Cameroon.mp. or exp Cameroon                                                                                                                                                                                        | 9641   |

|     |                                                              |        |
|-----|--------------------------------------------------------------|--------|
| 70. | Central African Republic.mp. or exp Central African Republic | 1349   |
| 71. | Chad.mp. or exp Chad                                         | 1734   |
| 72. | China.mp. or exp China                                       | 405192 |
| 73. | Colombia.mp. or exp Colombia                                 | 25591  |
| 74. | Comoros.mp. or exp Comoros                                   | 559    |
| 75. | exp Democratic Republic Congo/ or exp Congo/ or Congo.mp.    | 20650  |
| 76. | Costa Rica.mp. or exp Costa Rica                             | 6278   |
| 77. | Ivory Coast.mp. or exp Cote d'Ivoire                         | 3959   |
| 78. | Cuba.mp. or Cuba                                             | 8837   |
| 79. | Djibouti.mp. or exp Djibouti)                                | 553    |
| 80. | Djibouti.mp. or exp Djibouti                                 | 553    |
| 81. | exp "Dominican (Dominica)"/ or Dominica.mp. or exp Dominica  | 764    |
| 82. | Dominican Republic.mp. or exp Dominican Republic             | 3271   |
| 83. | Ecuador.mp. or exp Ecuador                                   | 7640   |
| 84. | exp Egypt/ or Egypt.mp                                       | 30517  |
| 85. | exp Egypt/ or Egypt.mp                                       | 30517  |
| 86. | El Salvador.mp. or exp El Salvador                           | 2423   |
| 87. | Equatorial Guinea.mp. or exp Equatorial Guinea               | 705    |
| 88. | Eritrea.mp. or exp Eritrea                                   | 840    |
| 89. | Ethiopia.mp. or exp Ethiopia                                 | 23227  |
| 90. | Fiji.mp. or exp Fiji                                         | 2666   |
| 91. | Gabon.mp. or exp Gabon                                       | 2465   |
| 92. | Gambia.mp. or exp Gambia                                     | 3471   |

|     |                                                                                                |        |
|-----|------------------------------------------------------------------------------------------------|--------|
| 93. | Georgia.mp. or exp "Georgia (republic)"/ or exp "South Georgia and the South Sandwich Islands" | 12977  |
| 94. | Ghana.mp. or exp Ghana)                                                                        | 15280  |
| 95. | Grenada.mp. or exp Grenada)                                                                    | 458    |
| 96. | Guatemala.mp. or exp Guatemala                                                                 | 5258   |
| 97. | exp Guinea-Bissau/ or Guinea.mp. or exp Guinea                                                 | 112538 |
| 98. | Guinea-Bissau.mp. or exp Guinea-Bissau                                                         | 1377   |
| 99. | Guyana.mp. or exp Guyana                                                                       | 1447   |
| 100 | Haiti.mp. or exp Haiti                                                                         | 5084   |
| 101 | Honduras.mp. or exp Honduras                                                                   | 2574   |
| 102 | exp India/ or India.mp.                                                                        | 231518 |
| 103 | exp India/ or India.mp.                                                                        | 231518 |
| 104 | exp India/ or India.mp.                                                                        | 231518 |
| 105 | Indonesia.mp. or exp Indonesia                                                                 | 28042  |
| 106 | Iran.mp. or exp Iran                                                                           | 76031  |
| 107 | Iraq.mp. or exp Iraq                                                                           | 15085  |
| 108 | Jamaica.mp. or exp Jamaica                                                                     | 4562   |
| 109 | Jordan.mp. or exp Jordan                                                                       | 11118  |
| 110 | Kazakhstan.mp. or exp Kazakhstan                                                               | 4775   |
| 111 | Kenya.mp. or exp Kenya                                                                         | 26424  |
| 112 | Kiribati.mp. or exp Kiribati                                                                   | 250    |
| 113 | exp North Korea/ or Korea.mp. or exp Korea/ or exp South Korea                                 | 103268 |
| 114 | Kosovo.mp. or exp Kosovo                                                                       | 1431   |
| 115 | Kyrgyz Republic.mp. or exp Kyrgyzstan                                                          | 1302   |

|     |                                                        |       |
|-----|--------------------------------------------------------|-------|
| 116 | Laos/ or Lao PDR.mp.                                   | 2756  |
| 117 | Lebanon.mp. or exp Lebanon                             | 7757  |
| 118 | Lesotho.mp. or exp Lesotho                             | 1009  |
| 119 | Liberia.mp. or exp Liberia                             | 2270  |
| 120 | Libya.mp. or exp Libyan Arab Jamahiriya                | 2177  |
| 121 | exp "Macedonia (republic)"/ or Macedonia.mp.           | 2357  |
| 122 | Madagascar.mp. or exp Madagascar                       | 6097  |
| 123 | Malawi.mp. or exp Malawi                               | 9928  |
| 124 | Malaysia.mp. or exp Malaysia                           | 31159 |
| 125 | Maldives.mp. or exp Maldives                           | 551   |
| 126 | Mali.mp. or exp Mali                                   | 5296  |
| 127 | exp Marshall Islands/ or Marshall Islands.mp.          | 372   |
| 128 | Mauritania.mp. or exp Mauritania                       | 902   |
| 129 | Mauritius.mp. or exp Mauritius                         | 1345  |
| 130 | exp Mexico/ or exp Mexico City/ or Mexico.mp.          | 69945 |
| 131 | Micronesia.mp. or exp "Federated States of Micronesia" | 1261  |
| 132 | Micronesia.mp. or exp "Federated States of Micronesia" | 1261  |
| 133 | Moldova.mp. or exp Moldova)                            | 1441  |
| 134 | exp Mongolia/ or Mongolia.mp.                          | 6282  |
| 135 | Montenegro.mp. or exp "Montenegro (republic)"          | 1461  |
| 136 | Morocco.mp. or exp Morocco                             | 10176 |
| 137 | Mozambique.mp. or exp Mozambique                       | 5141  |
| 138 | Myanmar.mp. or exp Myanmar                             | 5561  |
| 139 | Namibia.mp. or exp Namibia                             | 2342  |



|     |                                                                                                                                                                                                                       |       |
|-----|-----------------------------------------------------------------------------------------------------------------------------------------------------------------------------------------------------------------------|-------|
| 140 | Nauru.mp. or exp Nauru                                                                                                                                                                                                | 191   |
| 141 | Nepal.mp. or exp Nepal                                                                                                                                                                                                | 15738 |
| 142 | Nicaragua.mp. or exp Nicaragua                                                                                                                                                                                        | 2880  |
| 143 | exp Niger/ or Niger.mp.                                                                                                                                                                                               | 22149 |
| 144 | Nigeria.mp. or exp Nigeria                                                                                                                                                                                            | 46805 |
| 145 | Pakistan.mp. or exp Pakistan)                                                                                                                                                                                         | 38546 |
| 146 | Papua New Guinea.mp. or exp Papua New Guinea                                                                                                                                                                          | 6455  |
| 147 | Paraguay.mp. or exp Paraguay                                                                                                                                                                                          | 2289  |
| 148 | Peru.mp. or exp Peru                                                                                                                                                                                                  | 17534 |
| 149 | Philippines.mp. or exp Philippines                                                                                                                                                                                    | 14269 |
| 150 | Romania.mp. or exp Romania                                                                                                                                                                                            | 15655 |
| 151 | Russian Federation.mp. or exp Russian Federation                                                                                                                                                                      | 58634 |
| 152 | Rwanda.mp. or exp Rwanda                                                                                                                                                                                              | 4780  |
| 153 | exp Samoa/ or Samoa.mp.                                                                                                                                                                                               | 1258  |
| 154 | (Sao Tome and Principe).mp. [mp=title, abstract, heading word, drug trade name, original title, device<br>manufacturer, drug manufacturer, device trade name, keyword, floating subheading word, candidate term word] | 223   |
| 155 | exp Senegalia senegal/ or exp Senegal/ or Senegal.mp.                                                                                                                                                                 | 8356  |
| 156 | Serbia.mp. or exp Serbia                                                                                                                                                                                              | 8866  |
| 157 | Sierra Leone.mp. or exp Sierra Leone                                                                                                                                                                                  | 3277  |
| 158 | Solomon Islands.mp. or exp Solomon Islands                                                                                                                                                                            | 998   |
| 159 | Somalia.mp. or exp Somalia                                                                                                                                                                                            | 2583  |
| 160 | South Africa.mp. or exp South Africa                                                                                                                                                                                  | 63344 |
| 161 | South Sudan.mp. or exp Sudan/ or exp South Sudan/                                                                                                                                                                     | 6815  |

|     |                                                                                                                                                                                                                               |       |
|-----|-------------------------------------------------------------------------------------------------------------------------------------------------------------------------------------------------------------------------------|-------|
| 162 | Sri Lanka.mp. or exp Sri Lanka                                                                                                                                                                                                | 10832 |
| 163 | Saint Lucia.mp. or exp Saint Lucia                                                                                                                                                                                            | 154   |
| 164 | (Saint Vincent and the Grenadines).mp. [mp=title, abstract, heading word, drug trade name, original title, device manufacturer, drug manufacturer, device trade name, keyword, floating subheading word, candidate term word] | 90    |
| 165 | exp Sudan/ or Sudan.mp. or exp South Sudan                                                                                                                                                                                    | 10875 |
| 166 | Suriname.mp. or exp Suriname                                                                                                                                                                                                  | 1225  |
| 167 | Swaziland.mp. or exp Swaziland                                                                                                                                                                                                | 1565  |
| 168 | Syrian Arab Republic.mp. or exp Syrian Arab Republic/                                                                                                                                                                         | 2965  |
| 169 | Tajikistan.mp. or exp Tajikistan                                                                                                                                                                                              | 1116  |
| 170 | Tanzania.mp. or exp Tanzania                                                                                                                                                                                                  | 18529 |
| 171 | Thailand.mp. or exp Thailand                                                                                                                                                                                                  | 45080 |
| 172 | Timor-Leste.mp. or exp Timor-Leste                                                                                                                                                                                            | 760   |
| 173 | Togo.mp. or exp Togo                                                                                                                                                                                                          | 2096  |
| 174 | exp Tonga/ or Tonga.mp.                                                                                                                                                                                                       | 598   |
| 175 | Tunisia.mp. or exp Tunisia                                                                                                                                                                                                    | 12789 |
| 176 | Turkey.mp.                                                                                                                                                                                                                    | 75844 |
| 177 | Turkmenistan.mp. or exp Turkmenistan                                                                                                                                                                                          | 599   |
| 178 | Tuvalu.mp. or exp Tuvalu                                                                                                                                                                                                      | 102   |
| 179 | Uganda.mp. or exp Uganda                                                                                                                                                                                                      | 21051 |
| 180 | Ukraine.mp. or exp Ukraine                                                                                                                                                                                                    | 15286 |
| 181 | Uzbekistan.mp. or exp Uzbekistan                                                                                                                                                                                              | 2386  |
| 182 | Vanuatu.mp. or exp Vanuatu                                                                                                                                                                                                    | 822   |
| 183 | Venezuela.mp. or exp Venezuela                                                                                                                                                                                                | 7906  |

|     |                                                                                                                                                                                                                                                                                                                                                                                                                                                                                                                                                                                                                                                                                                                                                                                                                                                                                                                                                                                                                                                                                         |             |
|-----|-----------------------------------------------------------------------------------------------------------------------------------------------------------------------------------------------------------------------------------------------------------------------------------------------------------------------------------------------------------------------------------------------------------------------------------------------------------------------------------------------------------------------------------------------------------------------------------------------------------------------------------------------------------------------------------------------------------------------------------------------------------------------------------------------------------------------------------------------------------------------------------------------------------------------------------------------------------------------------------------------------------------------------------------------------------------------------------------|-------------|
| 184 | Vietnam.mp. or exp Viet Nam                                                                                                                                                                                                                                                                                                                                                                                                                                                                                                                                                                                                                                                                                                                                                                                                                                                                                                                                                                                                                                                             | 22219       |
| 185 | exp Palestine/ or Gaza.mp. or exp Palestinian                                                                                                                                                                                                                                                                                                                                                                                                                                                                                                                                                                                                                                                                                                                                                                                                                                                                                                                                                                                                                                           | 3329        |
| 186 | Yemen.mp. or exp Yemen                                                                                                                                                                                                                                                                                                                                                                                                                                                                                                                                                                                                                                                                                                                                                                                                                                                                                                                                                                                                                                                                  | 2713        |
| 187 | Zambia.mp. or exp Zambia                                                                                                                                                                                                                                                                                                                                                                                                                                                                                                                                                                                                                                                                                                                                                                                                                                                                                                                                                                                                                                                                | 7731        |
| 188 | Zimbabwe.mp. or exp Zimbabwe                                                                                                                                                                                                                                                                                                                                                                                                                                                                                                                                                                                                                                                                                                                                                                                                                                                                                                                                                                                                                                                            | 8083        |
| 189 | 42 or 43 or 44 or 45 or 46 or 47 or 48 or 49 or 50 or 51 or 52 or 53 or 54<br>or 55 or 56 or 57 or 58 or 59 or 60<br><br>or 61 or 62 or 63 or 64 or 65 or 66 or 67 or 68 or 69 or 70 or 71 or 72 or<br>73 or 74 or 75 or 76 or 77 or 78 or 79 or 80<br><br>or 81 or 82 or 83 or 84 or 85 or 86 or 87 or 88 or 89 or 90 or 91 or 92 or<br>93 or 94 or 95 or 96 or 97 or 98 or 99 or 100<br><br>or 101 or 102 or 103 or 104 or 105 or 106 or 107 or 108 or 109 or 110<br>or 111 or 112 or 113 or 114 or 115 or 116 or 117<br><br>or 118 or 119 or 120 or 121 or 122 or 123 or 124 or 125 or 126 or 127<br>or 128 or 129 or 130 or 131 or 132 or 133 or 134<br><br>or 135 or 136 or 137 or 138 or 139 or 140 or 141 or 142 or 143 or 144<br>or 145 or 146 or 147 or 148 or 149 or 150 or 151<br><br>or 152 or 153 or 154 or 155 or 156 or 157 or 158 or 159 or 160 or 161<br>or 162 or 163 or 164 or 165 or 166 or 167 or 168<br><br>or 169 or 170 or 171 or 172 or 173 or 174 or 175 or 176 or 177 or 178<br>or 179 or 180 or 181 or 182 or 183 or 184 or 185<br><br>or 186 or 187 or 188 | 208541<br>0 |
| 190 | 18 and 32 and 41 and 189                                                                                                                                                                                                                                                                                                                                                                                                                                                                                                                                                                                                                                                                                                                                                                                                                                                                                                                                                                                                                                                                | 807         |

Final search output: 807

### Search Summary-3

Name of the database

GLOBAL HEALTH (via Ovid)

Date of search

05 February 2019

Timeline

Not applicable

Search Language

| Line # | Theme      | Search Language                                                                                                        | Output # |
|--------|------------|------------------------------------------------------------------------------------------------------------------------|----------|
| 1.     | Hypoxaemia | hypoxemia.mp. [mp=abstract, title, original title, broad terms, heading words, identifiers, cabcodes]                  | 505      |
| 2.     |            | hypoxaemia.mp. [mp=abstract, title, original title, broad terms, heading words, identifiers, cabcodes]                 | 217      |
| 3.     |            | anoxia.mp. [mp=abstract, title, original title, broad terms, heading words, identifiers, cabcodes]                     | 393      |
| 4.     |            | hypoxia.mp. [mp=abstract, title, original title, broad terms, heading words, identifiers, cabcodes]                    | 4325     |
| 5.     |            | oximetry.mp. [mp=abstract, title, original title, broad terms, heading words, identifiers, cabcodes]                   | 350      |
| 6.     |            | oximeter.mp. [mp=abstract, title, original title, broad terms, heading words, identifiers, cabcodes]                   | 97       |
| 7.     |            | oximetre.mp. [mp=abstract, title, original title, broad terms, heading words, identifiers, cabcodes]                   | 1        |
| 8.     |            | oxymetry.mp. [mp=abstract, title, original title, broad terms, heading words, identifiers, cabcodes]                   | 12       |
| 9.     |            | oxymeter.mp. [mp=abstract, title, original title, broad terms, heading words, identifiers, cabcodes]                   | 6        |
| 10.    |            | oxymetre.mp. [mp=abstract, title, original title, broad terms, heading words, identifiers, cabcodes]                   | 0        |
| 11.    |            | blood oxygen saturation.mp. [mp=abstract, title, original title, broad terms, heading words, identifiers, cabcodes]    | 83       |
| 12.    |            | arterial oxygen saturation.mp. [mp=abstract, title, original title, broad terms, heading words, identifiers, cabcodes] | 111      |
| 13.    |            | blood gas monitoring.mp. [mp=abstract, title, original title, broad terms, heading words, identifiers, cabcodes]       | 6        |
| 14.    |            | blood gas analysis.mp. [mp=abstract, title, original title, broad terms, heading words, identifiers, cabcodes]         | 291      |

|     |                               |                                                                                                                                 |        |
|-----|-------------------------------|---------------------------------------------------------------------------------------------------------------------------------|--------|
| 15. |                               | analysis blood gas.mp. [mp=abstract, title, original title, broad terms, heading words, identifiers, cabicodes]                 | 0      |
| 16. |                               | SpO2.mp. [mp=abstract, title, original title, broad terms, heading words, identifiers, cabicodes]                               | 395    |
| 17. |                               | SPO2.mp. [mp=abstract, title, original title, broad terms, heading words, identifiers, cabicodes]                               | 395    |
| 18. |                               | 1 or 2 or 3 or 4 or 5 or 6 or 7 or 8 or 9 or 10 or 11 or 12 or 13 or 14 or 15 or 16 or 17                                       | 6094   |
| 19. | Pneumonia                     | pneumonia.mp. [mp=abstract, title, original title, broad terms, heading words, identifiers, cabicodes]                          | 23912  |
| 20. |                               | severe pneumonia.mp. [mp=abstract, title, original title, broad terms, heading words, identifiers, cabicodes]                   | 1056   |
| 21. |                               | severe disease.mp. [mp=abstract, title, original title, broad terms, heading words, identifiers, cabicodes]                     | 3526   |
| 22. |                               | very severe disease.mp. [mp=abstract, title, original title, broad terms, heading words, identifiers, cabicodes]                | 46     |
| 23. |                               | bronchiolitis.mp. [mp=abstract, title, original title, broad terms, heading words, identifiers, cabicodes]                      | 1597   |
| 24. |                               | acute respiratory infection.mp. [mp=abstract, title, original title, broad terms, heading words, identifiers, cabicodes]        | 846    |
| 25. |                               | ARI.mp. [mp=abstract, title, original title, broad terms, heading words, identifiers, cabicodes]                                | 846    |
| 26. |                               | acute respiratory infections.mp. [mp=abstract, title, original title, broad terms, heading words, identifiers, cabicodes]       | 985    |
| 27. |                               | acute respiratory tract infections.mp. [mp=abstract, title, original title, broad terms, heading words, identifiers, cabicodes] | 368    |
| 28. |                               | ARTI.mp. [mp=abstract, title, original title, broad terms, heading words, identifiers, cabicodes]                               | 149    |
| 29. |                               | acute respiratory tract infections.mp. [mp=abstract, title, original title, broad terms, heading words, identifiers, cabicodes] | 368    |
| 30. |                               | respiratory illness*.mp. [mp=abstract, title, original title, broad terms, heading words, identifiers, cabicodes]               | 2031   |
| 31. |                               | respiratory illnesses*.mp. [mp=abstract, title, original title, broad terms, heading words, identifiers, cabicodes]             | 577    |
| 32. |                               | 19 or 20 or 21 or 22 or 23 or 24 or 25 or 26 or 27 or 28 or 29 or 30 or 31                                                      | 31692  |
| 33. | children under 5 years of age | child.mp. [mp=abstract, title, original title, broad terms, heading words, identifiers, cabicodes]                              | 55244  |
| 34. |                               | children.mp. [mp=abstract, title, original title, broad terms, heading words, identifiers, cabicodes]                           | 209960 |
| 35. |                               | infant.mp. [mp=abstract, title, original title, broad terms, heading words, identifiers, cabicodes]                             | 34055  |
| 36. |                               | infants.mp. [mp=abstract, title, original title, broad terms, heading words, identifiers, cabicodes]                            | 65307  |
| 37. |                               | pediatric.mp. [mp=abstract, title, original title, broad terms, heading words, identifiers, cabicodes]                          | 22238  |

|     |                               |                                                                                                                       |        |
|-----|-------------------------------|-----------------------------------------------------------------------------------------------------------------------|--------|
| 38. |                               | pediatrics.mp. [mp=abstract, title, original title, broad terms, heading words, identifiers, cabicodes]               | 4805   |
| 39. |                               | paediatric.mp. [mp=abstract, title, original title, broad terms, heading words, identifiers, cabicodes]               | 8904   |
| 40. |                               | paediatrics.mp. [mp=abstract, title, original title, broad terms, heading words, identifiers, cabicodes]              | 3341   |
| 41. |                               | 33 or 34 or 35 or 36 or 37 or 38 or 39 or 40                                                                          | 263930 |
| 42. | Low and Middle Income Country | Afghanistan.mp. [mp=abstract, title, original title, broad terms, heading words, identifiers, cabicodes]              | 1515   |
| 43. |                               | Albania.mp. [mp=abstract, title, original title, broad terms, heading words, identifiers, cabicodes]                  | 735    |
| 44. |                               | Albania.mp. [mp=abstract, title, original title, broad terms, heading words, identifiers, cabicodes]                  | 735    |
| 45. |                               | American Samoa.mp. [mp=abstract, title, original title, broad terms, heading words, identifiers, cabicodes]           | 112    |
| 46. |                               | Angola.mp. [mp=abstract, title, original title, broad terms, heading words, identifiers, cabicodes]                   | 672    |
| 47. |                               | Armenia.mp. [mp=abstract, title, original title, broad terms, heading words, identifiers, cabicodes]                  | 326    |
| 48. |                               | Azerbaijan.mp. [mp=abstract, title, original title, broad terms, heading words, identifiers, cabicodes]               | 546    |
| 49. |                               | Bangladesh.mp. [mp=abstract, title, original title, broad terms, heading words, identifiers, cabicodes]               | 7717   |
| 50. |                               | Belarus.mp. [mp=abstract, title, original title, broad terms, heading words, identifiers, cabicodes]                  | 568    |
| 51. |                               | Belize.mp. [mp=abstract, title, original title, broad terms, heading words, identifiers, cabicodes]                   | 181    |
| 52. |                               | Benin.mp. [mp=abstract, title, original title, broad terms, heading words, identifiers, cabicodes]                    | 2179   |
| 53. |                               | Bhutan.mp. [mp=abstract, title, original title, broad terms, heading words, identifiers, cabicodes]                   | 417    |
| 54. |                               | Bolivia.mp. [mp=abstract, title, original title, broad terms, heading words, identifiers, cabicodes]                  | 1276   |
| 55. |                               | (Bosnia and Herzegovina).mp. [mp=abstract, title, original title, broad terms, heading words, identifiers, cabicodes] | 578    |
| 56. |                               | Botswana.mp. [mp=abstract, title, original title, broad terms, heading words, identifiers, cabicodes]                 | 1097   |
| 57. |                               | Brazil.mp. [mp=abstract, title, original title, broad terms, heading words, identifiers, cabicodes]                   | 57836  |
| 58. |                               | Bulgaria.mp. [mp=abstract, title, original title, broad terms, heading words, identifiers, cabicodes]                 | 3181   |
| 59. |                               | Burkina Faso.mp. [mp=abstract, title, original title, broad terms, heading words, identifiers, cabicodes]             | 2593   |
| 60. |                               | Burundi.mp. [mp=abstract, title, original title, broad terms, heading words, identifiers, cabicodes]                  | 291    |

|     |                                                                                                                                                             |        |
|-----|-------------------------------------------------------------------------------------------------------------------------------------------------------------|--------|
| 61. | Cabo Verde.mp. [mp=abstract, title, original title, broad terms, heading words, identifiers, cabicodes]                                                     | 17     |
| 62. | Cambodia.mp. [mp=abstract, title, original title, broad terms, heading words, identifiers, cabicodes]                                                       | 2188   |
| 63. | Cameroon.mp. [mp=abstract, title, original title, broad terms, heading words, identifiers, cabicodes]                                                       | 3674   |
| 64. | Central African Republic.mp. [mp=abstract, title, original title, broad terms, heading words, identifiers, cabicodes]                                       | 398    |
| 65. | Chad.mp. [mp=abstract, title, original title, broad terms, heading words, identifiers, cabicodes]                                                           | 501    |
| 66. | China.mp. [mp=abstract, title, original title, broad terms, heading words, identifiers, cabicodes]                                                          | 140022 |
| 67. | Colombia.mp. [mp=abstract, title, original title, broad terms, heading words, identifiers, cabicodes]                                                       | 6489   |
| 68. | Comoros.mp. [mp=abstract, title, original title, broad terms, heading words, identifiers, cabicodes]                                                        | 168    |
| 69. | (Democratic Republic of Congo or DR Congo or DRC or the Congo).mp. [mp=abstract, title, original title, broad terms, heading words, identifiers, cabicodes] | 4453   |
| 70. | Congo.mp. [mp=abstract, title, original title, broad terms, heading words, identifiers, cabicodes]                                                          | 4298   |
| 71. | Costa Rica.mp. [mp=abstract, title, original title, broad terms, heading words, identifiers, cabicodes]                                                     | 1257   |
| 72. | Ivory Coast.mp. [mp=abstract, title, original title, broad terms, heading words, identifiers, cabicodes]                                                    | 1864   |
| 73. | Cuba.mp. [mp=abstract, title, original title, broad terms, heading words, identifiers, cabicodes]                                                           | 2711   |
| 74. | Djibouti.mp. [mp=abstract, title, original title, broad terms, heading words, identifiers, cabicodes]                                                       | 159    |
| 75. | Dominica.mp. [mp=abstract, title, original title, broad terms, heading words, identifiers, cabicodes]                                                       | 148    |
| 76. | Dominican Republic.mp. [mp=abstract, title, original title, broad terms, heading words, identifiers, cabicodes]                                             | 598    |
| 77. | Ecuador.mp. [mp=abstract, title, original title, broad terms, heading words, identifiers, cabicodes]                                                        | 1523   |
| 78. | Egypt.mp. [mp=abstract, title, original title, broad terms, heading words, identifiers, cabicodes]                                                          | 8075   |
| 79. | El Salvador.mp. [mp=abstract, title, original title, broad terms, heading words, identifiers, cabicodes]                                                    | 471    |
| 80. | Equatorial Guinea.mp. [mp=abstract, title, original title, broad terms, heading words, identifiers, cabicodes]                                              | 201    |
| 81. | Eritrea.mp. [mp=abstract, title, original title, broad terms, heading words, identifiers, cabicodes]                                                        | 227    |
| 82. | Ethiopia.mp. [mp=abstract, title, original title, broad terms, heading words, identifiers, cabicodes]                                                       | 7844   |

|      |                                                                                                                              |       |
|------|------------------------------------------------------------------------------------------------------------------------------|-------|
| 83.  | Fiji.mp. [mp=abstract, title, original title, broad terms, heading words, identifiers, cabcodes]                             | 382   |
| 84.  | Gabon.mp. [mp=abstract, title, original title, broad terms, heading words, identifiers, cabcodes]                            | 777   |
| 85.  | Gambia.mp. [mp=abstract, title, original title, broad terms, heading words, identifiers, cabcodes]                           | 948   |
| 86.  | Georgia.mp. [mp=abstract, title, original title, broad terms, heading words, identifiers, cabcodes]                          | 3603  |
| 87.  | Ghana.mp. [mp=abstract, title, original title, broad terms, heading words, identifiers, cabcodes]                            | 5846  |
| 88.  | Grenada.mp. [mp=abstract, title, original title, broad terms, heading words, identifiers, cabcodes]                          | 134   |
| 89.  | Guatemala.mp. [mp=abstract, title, original title, broad terms, heading words, identifiers, cabcodes]                        | 1227  |
| 90.  | (Guinea-Bissau or Guinea Bissau).mp. [mp=abstract, title, original title, broad terms, heading words, identifiers, cabcodes] | 414   |
| 91.  | Guyana.mp. [mp=abstract, title, original title, broad terms, heading words, identifiers, cabcodes]                           | 281   |
| 92.  | Haiti.mp. [mp=abstract, title, original title, broad terms, heading words, identifiers, cabcodes]                            | 1216  |
| 93.  | Honduras.mp. [mp=abstract, title, original title, broad terms, heading words, identifiers, cabcodes]                         | 518   |
| 94.  | India.mp. [mp=abstract, title, original title, broad terms, heading words, identifiers, cabcodes]                            | 71629 |
| 95.  | Indonesia.mp. [mp=abstract, title, original title, broad terms, heading words, identifiers, cabcodes]                        | 6099  |
| 96.  | Iran.mp. [mp=abstract, title, original title, broad terms, heading words, identifiers, cabcodes]                             | 39859 |
| 97.  | Iraq.mp. [mp=abstract, title, original title, broad terms, heading words, identifiers, cabcodes]                             | 2448  |
| 98.  | Jamaica.mp. [mp=abstract, title, original title, broad terms, heading words, identifiers, cabcodes]                          | 819   |
| 99.  | Jordan.mp. [mp=abstract, title, original title, broad terms, heading words, identifiers, cabcodes]                           | 2043  |
| 100. | Kazakhstan.mp. [mp=abstract, title, original title, broad terms, heading words, identifiers, cabcodes]                       | 806   |
| 101. | Kenya.mp. [mp=abstract, title, original title, broad terms, heading words, identifiers, cabcodes]                            | 8859  |
| 102. | Kiribati.mp. [mp=abstract, title, original title, broad terms, heading words, identifiers, cabcodes]                         | 70    |
| 103. | Korea.mp. [mp=abstract, title, original title, broad terms, heading words, identifiers, cabcodes]                            | 19978 |
| 104. | Kosovo.mp. [mp=abstract, title, original title, broad terms, heading words, identifiers, cabcodes]                           | 400   |
| 105. | Kyrgyz.mp. [mp=abstract, title, original title, broad terms, heading words, identifiers, cabcodes]                           | 47    |



|      |                                                                                                              |       |
|------|--------------------------------------------------------------------------------------------------------------|-------|
| 106. | Lao.mp. [mp=abstract, title, original title, broad terms, heading words, identifiers, cabcodes]              | 1180  |
| 107. | Lebanon.mp. [mp=abstract, title, original title, broad terms, heading words, identifiers, cabcodes]          | 1592  |
| 108. | Lesotho.mp. [mp=abstract, title, original title, broad terms, heading words, identifiers, cabcodes]          | 369   |
| 109. | Liberia.mp. [mp=abstract, title, original title, broad terms, heading words, identifiers, cabcodes]          | 694   |
| 110. | Libya.mp. [mp=abstract, title, original title, broad terms, heading words, identifiers, cabcodes]            | 575   |
| 111. | Macedonia.mp. [mp=abstract, title, original title, broad terms, heading words, identifiers, cabcodes]        | 849   |
| 112. | Madagascar.mp. [mp=abstract, title, original title, broad terms, heading words, identifiers, cabcodes]       | 1400  |
| 113. | Malawi.mp. [mp=abstract, title, original title, broad terms, heading words, identifiers, cabcodes]           | 3882  |
| 114. | Malaysia.mp. [mp=abstract, title, original title, broad terms, heading words, identifiers, cabcodes]         | 8375  |
| 115. | Maldives.mp. [mp=abstract, title, original title, broad terms, heading words, identifiers, cabcodes]         | 109   |
| 116. | Mali.mp. [mp=abstract, title, original title, broad terms, heading words, identifiers, cabcodes]             | 1738  |
| 117. | Marshall Islands.mp. [mp=abstract, title, original title, broad terms, heading words, identifiers, cabcodes] | 87    |
| 118. | Mauritania.mp. [mp=abstract, title, original title, broad terms, heading words, identifiers, cabcodes]       | 231   |
| 119. | Mauritius.mp. [mp=abstract, title, original title, broad terms, heading words, identifiers, cabcodes]        | 327   |
| 120. | Mexico.mp. [mp=abstract, title, original title, broad terms, heading words, identifiers, cabcodes]           | 13948 |
| 121. | Micronesia.mp. [mp=abstract, title, original title, broad terms, heading words, identifiers, cabcodes]       | 469   |
| 122. | Moldova.mp. [mp=abstract, title, original title, broad terms, heading words, identifiers, cabcodes]          | 349   |
| 123. | Mongolia.mp. [mp=abstract, title, original title, broad terms, heading words, identifiers, cabcodes]         | 1699  |
| 124. | Montenegro.mp. [mp=abstract, title, original title, broad terms, heading words, identifiers, cabcodes]       | 487   |
| 125. | Morocco.mp. [mp=abstract, title, original title, broad terms, heading words, identifiers, cabcodes]          | 4146  |
| 126. | Mozambique.mp. [mp=abstract, title, original title, broad terms, heading words, identifiers, cabcodes]       | 1877  |
| 127. | Myanmar.mp. [mp=abstract, title, original title, broad terms, heading words, identifiers, cabcodes]          | 2052  |
| 128. | Namibia.mp. [mp=abstract, title, original title, broad terms, heading words, identifiers, cabcodes]          | 601   |

|      |                                                                                                                                   |       |
|------|-----------------------------------------------------------------------------------------------------------------------------------|-------|
| 129. | Nauru.mp. [mp=abstract, title, original title, broad terms, heading words, identifiers, cabcodes]                                 | 44    |
| 130. | Nepal.mp. [mp=abstract, title, original title, broad terms, heading words, identifiers, cabcodes]                                 | 4514  |
| 131. | Nicaragua.mp. [mp=abstract, title, original title, broad terms, heading words, identifiers, cabcodes]                             | 732   |
| 132. | Niger.mp. [mp=abstract, title, original title, broad terms, heading words, identifiers, cabcodes]                                 | 7584  |
| 133. | Pakistan.mp. [mp=abstract, title, original title, broad terms, heading words, identifiers, cabcodes]                              | 11064 |
| 134. | Papua New Guinea.mp. [mp=abstract, title, original title, broad terms, heading words, identifiers, cabcodes]                      | 1144  |
| 135. | Paraguay.mp. [mp=abstract, title, original title, broad terms, heading words, identifiers, cabcodes]                              | 621   |
| 136. | Peru.mp. [mp=abstract, title, original title, broad terms, heading words, identifiers, cabcodes]                                  | 4376  |
| 137. | Philippines.mp. [mp=abstract, title, original title, broad terms, heading words, identifiers, cabcodes]                           | 2927  |
| 138. | Romania.mp. [mp=abstract, title, original title, broad terms, heading words, identifiers, cabcodes]                               | 5990  |
| 139. | Russia.mp. [mp=abstract, title, original title, broad terms, heading words, identifiers, cabcodes]                                | 7296  |
| 140. | Rwanda.mp. [mp=abstract, title, original title, broad terms, heading words, identifiers, cabcodes]                                | 1357  |
| 141. | Samoa.mp. [mp=abstract, title, original title, broad terms, heading words, identifiers, cabcodes]                                 | 277   |
| 142. | (Timor-Liste or Timor Liste or Timor).mp. [mp=abstract, title, original title, broad terms, heading words, identifiers, cabcodes] | 286   |
| 143. | Senegal.mp. [mp=abstract, title, original title, broad terms, heading words, identifiers, cabcodes]                               | 2443  |
| 144. | Serbia.mp. [mp=abstract, title, original title, broad terms, heading words, identifiers, cabcodes]                                | 3061  |
| 145. | Sierra Leone.mp. [mp=abstract, title, original title, broad terms, heading words, identifiers, cabcodes]                          | 999   |
| 146. | Solomon Islands.mp. [mp=abstract, title, original title, broad terms, heading words, identifiers, cabcodes]                       | 263   |
| 147. | Somalia.mp. [mp=abstract, title, original title, broad terms, heading words, identifiers, cabcodes]                               | 644   |
| 148. | South Africa.mp. [mp=abstract, title, original title, broad terms, heading words, identifiers, cabcodes]                          | 17163 |
| 149. | South Sudan.mp. [mp=abstract, title, original title, broad terms, heading words, identifiers, cabcodes]                           | 386   |
| 150. | Sri Lanka.mp. [mp=abstract, title, original title, broad terms, heading words, identifiers, cabcodes]                             | 2841  |
| 151. | Saint Lucia.mp. [mp=abstract, title, original title, broad terms, heading words, identifiers, cabcodes]                           | 65    |

|      |                                                                                                                          |       |
|------|--------------------------------------------------------------------------------------------------------------------------|-------|
| 152. | (Vincent and the Grenadines).mp. [mp=abstract, title, original title, broad terms, heading words, identifiers, cabcodes] | 44    |
| 153. | Sudan.mp. [mp=abstract, title, original title, broad terms, heading words, identifiers, cabcodes]                        | 3106  |
| 154. | Suriname.mp. [mp=abstract, title, original title, broad terms, heading words, identifiers, cabcodes]                     | 279   |
| 155. | Swaziland.mp. [mp=abstract, title, original title, broad terms, heading words, identifiers, cabcodes]                    | 501   |
| 156. | Syria.mp. [mp=abstract, title, original title, broad terms, heading words, identifiers, cabcodes]                        | 820   |
| 157. | Tajikistan.mp. [mp=abstract, title, original title, broad terms, heading words, identifiers, cabcodes]                   | 278   |
| 158. | Tanzania.mp. [mp=abstract, title, original title, broad terms, heading words, identifiers, cabcodes]                     | 6627  |
| 159. | Thailand.mp. [mp=abstract, title, original title, broad terms, heading words, identifiers, cabcodes]                     | 13856 |
| 160. | Timor-Leste.mp. [mp=abstract, title, original title, broad terms, heading words, identifiers, cabcodes]                  | 173   |
| 161. | Togo.mp. [mp=abstract, title, original title, broad terms, heading words, identifiers, cabcodes]                         | 707   |
| 162. | Tonga.mp. [mp=abstract, title, original title, broad terms, heading words, identifiers, cabcodes]                        | 132   |
| 163. | Tunisia.mp. [mp=abstract, title, original title, broad terms, heading words, identifiers, cabcodes]                      | 3836  |
| 164. | Turkey.mp. [mp=abstract, title, original title, broad terms, heading words, identifiers, cabcodes]                       | 25147 |
| 165. | Turkmenistan.mp. [mp=abstract, title, original title, broad terms, heading words, identifiers, cabcodes]                 | 90    |
| 166. | Tuvalu.mp. [mp=abstract, title, original title, broad terms, heading words, identifiers, cabcodes]                       | 29    |
| 167. | Uganda.mp. [mp=abstract, title, original title, broad terms, heading words, identifiers, cabcodes]                       | 7227  |
| 168. | Ukraine.mp. [mp=abstract, title, original title, broad terms, heading words, identifiers, cabcodes]                      | 1415  |
| 169. | Uzbekistan.mp. [mp=abstract, title, original title, broad terms, heading words, identifiers, cabcodes]                   | 337   |
| 170. | Vanuatu.mp. [mp=abstract, title, original title, broad terms, heading words, identifiers, cabcodes]                      | 211   |
| 171. | Venezuela.mp. [mp=abstract, title, original title, broad terms, heading words, identifiers, cabcodes]                    | 2273  |
| 172. | Vietnam.mp. [mp=abstract, title, original title, broad terms, heading words, identifiers, cabcodes]                      | 5464  |
| 173. | (West Bank and Gaza).mp. [mp=abstract, title, original title, broad terms, heading words, identifiers, cabcodes]         | 101   |
| 174. | Yemen.mp. [mp=abstract, title, original title, broad terms, heading words, identifiers, cabcodes]                        | 916   |

|      |  |                                                                                                                                                                                                                                                                                                                                                                                                                                                                                                                                                                                                                                                                                                                                                                                                                                                                                                                     |        |
|------|--|---------------------------------------------------------------------------------------------------------------------------------------------------------------------------------------------------------------------------------------------------------------------------------------------------------------------------------------------------------------------------------------------------------------------------------------------------------------------------------------------------------------------------------------------------------------------------------------------------------------------------------------------------------------------------------------------------------------------------------------------------------------------------------------------------------------------------------------------------------------------------------------------------------------------|--------|
| 175. |  | Zambia.mp. [mp=abstract, title, original title, broad terms, heading words, identifiers, cabcodes]                                                                                                                                                                                                                                                                                                                                                                                                                                                                                                                                                                                                                                                                                                                                                                                                                  | 2634   |
| 176. |  | Zimbabwe.mp. [mp=abstract, title, original title, broad terms, heading words, identifiers, cabcodes]                                                                                                                                                                                                                                                                                                                                                                                                                                                                                                                                                                                                                                                                                                                                                                                                                | 2171   |
| 177. |  | 42 or 43 or 44 or 45 or 46 or 47 or 48 or 49 or 50 or 51 or 52 or 53 or 54 or 55 or 56 or 57 or 58 or 59 or 60 or 61 or 62 or 63 or 64 or 65 or 66 or 67 or 68 or 69 or 70 or 71 or 72 or 73 or 74 or 75 or 76 or 77 or 78 or 79 or 80 or 81 or 82 or 83 or 84 or 85 or 86 or 87 or 88 or 89 or 90 or 91 or 92 or 93 or 94 or 95 or 96 or 97 or 98 or 99 or 100 or 101 or 102 or 103 or 104 or 105 or 106 or 107 or 108 or 109 or 110 or 111 or 112 or 113 or 114 or 115 or 116 or 117 or 118 or 119 or 120 or 121 or 122 or 123 or 124 or 125 or 126 or 127 or 128 or 129 or 130 or 131 or 132 or 133 or 134 or 135 or 136 or 137 or 138 or 139 or 140 or 141 or 142 or 143 or 144 or 145 or 146 or 147 or 148 or 149 or 150 or 151 or 152 or 153 or 154 or 155 or 156 or 157 or 158 or 159 or 160 or 161 or 162 or 163 or 164 or 165 or 166 or 167 or 168 or 169 or 170 or 171 or 172 or 173 or 174 or 175 or 176 | 569993 |
| 178. |  | developing countr*.mp. [mp=abstract, title, original title, broad terms, heading words, identifiers, cabcodes]                                                                                                                                                                                                                                                                                                                                                                                                                                                                                                                                                                                                                                                                                                                                                                                                      | 567746 |
| 179. |  | low-and middle income countr*.mp. [mp=abstract, title, original title, broad terms, heading words, identifiers, cabcodes]                                                                                                                                                                                                                                                                                                                                                                                                                                                                                                                                                                                                                                                                                                                                                                                           | 5367   |
| 180. |  | LMIC*.mp. [mp=abstract, title, original title, broad terms, heading words, identifiers, cabcodes]                                                                                                                                                                                                                                                                                                                                                                                                                                                                                                                                                                                                                                                                                                                                                                                                                   | 1389   |
| 181. |  | low income countr*.mp. [mp=abstract, title, original title, broad terms, heading words, identifiers, cabcodes]                                                                                                                                                                                                                                                                                                                                                                                                                                                                                                                                                                                                                                                                                                                                                                                                      | 2855   |
| 182. |  | middle income countr*.mp. [mp=abstract, title, original title, broad terms, heading words, identifiers, cabcodes]                                                                                                                                                                                                                                                                                                                                                                                                                                                                                                                                                                                                                                                                                                                                                                                                   | 6787   |
| 183. |  | lower middle income countr*.mp. [mp=abstract, title, original title, broad terms, heading words, identifiers, cabcodes]                                                                                                                                                                                                                                                                                                                                                                                                                                                                                                                                                                                                                                                                                                                                                                                             | 285    |
| 184. |  | upper middle income countr*.mp. [mp=abstract, title, original title, broad terms, heading words, identifiers, cabcodes]                                                                                                                                                                                                                                                                                                                                                                                                                                                                                                                                                                                                                                                                                                                                                                                             | 143    |
| 185. |  | 178 or 179 or 180 or 181 or 182 or 183 or 184                                                                                                                                                                                                                                                                                                                                                                                                                                                                                                                                                                                                                                                                                                                                                                                                                                                                       | 570617 |
| 186. |  | 177 or 185                                                                                                                                                                                                                                                                                                                                                                                                                                                                                                                                                                                                                                                                                                                                                                                                                                                                                                          | 623022 |
| 187. |  | 18 and 32 and 41 and 186                                                                                                                                                                                                                                                                                                                                                                                                                                                                                                                                                                                                                                                                                                                                                                                                                                                                                            | 130    |

Final search output

### Search Summary-4

Name of the database

Cochrane (Advanced)

Date of search

30 September, 2021

Timeline

Not applicable

Search Language

| Line # | Theme      | Search Language                                                                                                                                                                                                                                                                                                                                                          | Output # |
|--------|------------|--------------------------------------------------------------------------------------------------------------------------------------------------------------------------------------------------------------------------------------------------------------------------------------------------------------------------------------------------------------------------|----------|
| 1      | Hypoxaemia | hypoxemia                                                                                                                                                                                                                                                                                                                                                                | 3,210    |
| 2      |            | hypoxaemia                                                                                                                                                                                                                                                                                                                                                               | 3,210    |
| 3      |            | anoxia                                                                                                                                                                                                                                                                                                                                                                   | 264      |
| 4      |            | hypoxia                                                                                                                                                                                                                                                                                                                                                                  | 7,110    |
| 5      |            | oximetry                                                                                                                                                                                                                                                                                                                                                                 | 4,239    |
| 6      |            | oximeter                                                                                                                                                                                                                                                                                                                                                                 | 1,611    |
| 7      |            | oximetre                                                                                                                                                                                                                                                                                                                                                                 | 10       |
| 8      |            | oxymetry                                                                                                                                                                                                                                                                                                                                                                 | 212      |
| 9      |            | oxymeter                                                                                                                                                                                                                                                                                                                                                                 | 126      |
| 10     |            | oxymetre                                                                                                                                                                                                                                                                                                                                                                 | 1        |
| 11     |            | blood oxygen saturation                                                                                                                                                                                                                                                                                                                                                  | 7,914    |
| 12     |            | arterial oxygen saturation                                                                                                                                                                                                                                                                                                                                               | 5,098    |
| 13     |            | blood gas monitoring                                                                                                                                                                                                                                                                                                                                                     | 1,513    |
| 14     |            | blood gas analysis                                                                                                                                                                                                                                                                                                                                                       | 5,573    |
| 15     |            | analysis blood gas                                                                                                                                                                                                                                                                                                                                                       | 5,573    |
| 16     |            | SpO2                                                                                                                                                                                                                                                                                                                                                                     | 4,599    |
| 17     |            | SPO2                                                                                                                                                                                                                                                                                                                                                                     | 4,599    |
| 18     |            | 1 or 2 or 3 or 4 or 5 or 6 or 7 or 8 or 9 or 10 or 11 or 12 or 13 or 14 or 15 or 16 or 17<br>hypoxemia OR hypoxaemia OR anoxia OR hypoxia OR oximetry OR oximeter OR oximetre OR oxymetry OR oxymeter OR oxymetre OR (blood oxygen saturation) OR (arterial oxygen saturation) OR (blood gas monitoring) OR (blood gas analysis) OR (analysis blood gas) OR SpO2 OR SPO2 | 27,530   |
| 19     | Pneumonia  | pneumonia                                                                                                                                                                                                                                                                                                                                                                | 18,602   |
| 20     |            | severe pneumonia                                                                                                                                                                                                                                                                                                                                                         | 4,571    |
| 21     |            | severe disease                                                                                                                                                                                                                                                                                                                                                           | 49,561   |
| 22     |            | very severe disease                                                                                                                                                                                                                                                                                                                                                      | 8,482    |

|    |                                        |                                                                                                                                                                                                                                                                                                                                                                                                                                                                                                                                                                                                                                                                                                                                                                                                                                                 |         |
|----|----------------------------------------|-------------------------------------------------------------------------------------------------------------------------------------------------------------------------------------------------------------------------------------------------------------------------------------------------------------------------------------------------------------------------------------------------------------------------------------------------------------------------------------------------------------------------------------------------------------------------------------------------------------------------------------------------------------------------------------------------------------------------------------------------------------------------------------------------------------------------------------------------|---------|
| 23 |                                        | bronchiolitis                                                                                                                                                                                                                                                                                                                                                                                                                                                                                                                                                                                                                                                                                                                                                                                                                                   | 1,648   |
| 24 |                                        | acute respiratory infection                                                                                                                                                                                                                                                                                                                                                                                                                                                                                                                                                                                                                                                                                                                                                                                                                     | 5,442   |
| 25 |                                        | ARI                                                                                                                                                                                                                                                                                                                                                                                                                                                                                                                                                                                                                                                                                                                                                                                                                                             | 6,581   |
| 26 |                                        | acute respiratory infections                                                                                                                                                                                                                                                                                                                                                                                                                                                                                                                                                                                                                                                                                                                                                                                                                    | 4,112   |
| 27 |                                        | acute respiratory tract infection                                                                                                                                                                                                                                                                                                                                                                                                                                                                                                                                                                                                                                                                                                                                                                                                               | 2,953   |
| 28 |                                        | ARTI                                                                                                                                                                                                                                                                                                                                                                                                                                                                                                                                                                                                                                                                                                                                                                                                                                            | 116     |
| 29 |                                        | acute respiratory tract infections                                                                                                                                                                                                                                                                                                                                                                                                                                                                                                                                                                                                                                                                                                                                                                                                              | 2,394   |
| 30 |                                        | respiratory illness*                                                                                                                                                                                                                                                                                                                                                                                                                                                                                                                                                                                                                                                                                                                                                                                                                            | 6,484   |
| 31 |                                        | respiratory illnesses*                                                                                                                                                                                                                                                                                                                                                                                                                                                                                                                                                                                                                                                                                                                                                                                                                          | 997     |
| 32 |                                        | 19 or 20 or 21 or 22 or 23 or 24 or 25 or 26 or 27 or 28 or 29 or 30 or 31<br>pneumonia OR (severe pneumonia) OR (severe disease) OR (very severe disease) OR bronchiolitis OR (acute respiratory infection) OR ari OR (acute respiratory infections) OR (acute respiratory tract infection) OR arti OR (acute respiratory tract infections) OR (respiratory illness*) OR (respiratory illnesses*)                                                                                                                                                                                                                                                                                                                                                                                                                                              | 77,649  |
| 33 | children<br>under 5<br>years of age    | child                                                                                                                                                                                                                                                                                                                                                                                                                                                                                                                                                                                                                                                                                                                                                                                                                                           | 176,881 |
| 34 |                                        | children                                                                                                                                                                                                                                                                                                                                                                                                                                                                                                                                                                                                                                                                                                                                                                                                                                        | 176,879 |
| 35 |                                        | infant                                                                                                                                                                                                                                                                                                                                                                                                                                                                                                                                                                                                                                                                                                                                                                                                                                          | 53,917  |
| 36 |                                        | infants                                                                                                                                                                                                                                                                                                                                                                                                                                                                                                                                                                                                                                                                                                                                                                                                                                         | 35,995  |
| 37 |                                        | pediatric                                                                                                                                                                                                                                                                                                                                                                                                                                                                                                                                                                                                                                                                                                                                                                                                                                       | 55,900  |
| 38 |                                        | pediatrics                                                                                                                                                                                                                                                                                                                                                                                                                                                                                                                                                                                                                                                                                                                                                                                                                                      | 28,695  |
| 39 |                                        | paediatric                                                                                                                                                                                                                                                                                                                                                                                                                                                                                                                                                                                                                                                                                                                                                                                                                                      | 55,893  |
| 40 |                                        | paediatrics                                                                                                                                                                                                                                                                                                                                                                                                                                                                                                                                                                                                                                                                                                                                                                                                                                     | 28,695  |
| 41 |                                        | 33 or 34 or 35 or 36 or 37 or 38 or 39 or 40<br>Child* OR children* OR infant* OR infants* OR pediatric* OR pediatrics* OR paediatric* OR paediatrics*                                                                                                                                                                                                                                                                                                                                                                                                                                                                                                                                                                                                                                                                                          | 226,372 |
| 42 | <b>low and middle income countries</b> | Albania OR Algeria OR Angola OR American Samoa OR Armenia OR Azerbaijan OR Bangladesh OR Benin OR Belarus OR Belize OR Bhutan OR Bolivia OR "Bosnia and Herzegovina" OR Botswana OR Brazil OR Bulgaria OR "Burkina Faso" OR Burundi OR Cambodia OR Cameroon OR "Cape Verde" OR "Central African Republic" OR Chad OR China OR Colombia OR Comoros OR "Congo, Dem. Rep" OR "Congo, Rep." OR "Costa Rica" OR "Cote d'Ivoire" OR Cuba OR Djibouti OR Dominica OR "Dominican Republic" OR "Ecuador" OR " Egypt, Arab Rep." OR "El Salvador" OR Eritrea OR Ethiopia OR Ethiopia OR Fiji OR Gabon OR "Gambia, The" OR Georgia OR Ghana OR Grenada OR Guatemala OR Guinea OR Guyana OR "Guinea-Bissau " OR Haiti OR Honduras OR India OR Maldives OR Indonesia OR "Iran, Islamic Rep." OR Iraq OR Jamaica OR Jordan OR Kazakhstan OR Kenya OR Kiribati | 184,808 |

|    |  |                                                                                                                                                                                                                                                                                                                                                                                                                                                                                                                                                                                                                                                                                                                                                                                                                                                                                                                                                                                                                                                                                                                                                                                                                                                                            |     |
|----|--|----------------------------------------------------------------------------------------------------------------------------------------------------------------------------------------------------------------------------------------------------------------------------------------------------------------------------------------------------------------------------------------------------------------------------------------------------------------------------------------------------------------------------------------------------------------------------------------------------------------------------------------------------------------------------------------------------------------------------------------------------------------------------------------------------------------------------------------------------------------------------------------------------------------------------------------------------------------------------------------------------------------------------------------------------------------------------------------------------------------------------------------------------------------------------------------------------------------------------------------------------------------------------|-----|
|    |  | OR "Korea, Dem. People's Rep." OR Kosovo OR "Kyrgyz Republic" OR "Lao PDR" OR Lebanon OR Lesotho OR Liberia OR Libya OR "Macedonia, FYR" OR Madagascar OR Malaysia OR Malawi OR Mali OR "Marshall Islands" OR Mauritania OR Mauritius OR Mexico OR "Micronesia, Fed. Sts." OR Moldova OR Mongolia OR Montenegro OR Morocco OR Mozambique OR Myanmar OR Namibia OR Nepal OR Nauru OR Nicaragua OR Niger OR Nigeria OR Pakistan OR "Papua New Guinea" OR Paraguay OR Peru OR Philippines OR Romania OR "Russian Federation" OR Rwanda OR Samoa OR " São Tomé and Príncipe" OR Senegal OR Serbia OR " Sierra Leone" OR Somalia OR Grenadines OR "Samoan Islands" OR " South Africa" OR "St. Lucia" OR "St. Vincent and the Grenadines" OR Sudan OR Suriname OR Swaziland OR " Syrian Arab Republic" OR "Sri Lanka" OR Tajikistan OR Tanzania OR Thailand OR Togo OR Tonga OR Tunisia OR Turkey OR Turkmenistan OR Tuvalu OR "Timor-Leste" OR Uganda OR Ukraine OR Uzbekistan OR Vanuatu OR Venezuela, RB OR Vietnam OR "West Bank and Gaza" OR "Yemen, Rep." OR Zambia OR Zimbabwe OR (developing countr*) OR (low-and middle income countr*) OR (LMIC*) OR (low income countr*) OR (middle income countr*) OR (lower middle income countr*) OR (upper middle income countr*) |     |
| 43 |  | 18 AND 32 AND 41 AND 42                                                                                                                                                                                                                                                                                                                                                                                                                                                                                                                                                                                                                                                                                                                                                                                                                                                                                                                                                                                                                                                                                                                                                                                                                                                    | 153 |

Final search output: 153

## Search Summary 5

Name of the database

Clinicaltrials.gov

Date of search

30 September, 2021

Timeline

Not applicable

Search Language

| Line # | Theme      | hypoxemia                    | Output #                                                                                                                                                                                                                                                                                                                                                       |
|--------|------------|------------------------------|----------------------------------------------------------------------------------------------------------------------------------------------------------------------------------------------------------------------------------------------------------------------------------------------------------------------------------------------------------------|
| 1      | Hypoxaemia | hypoxemia                    | 884                                                                                                                                                                                                                                                                                                                                                            |
| 2      |            | hypoxaemia                   | 884                                                                                                                                                                                                                                                                                                                                                            |
| 3      |            | anoxia                       | 35                                                                                                                                                                                                                                                                                                                                                             |
| 4      |            | hypoxia                      | 2383                                                                                                                                                                                                                                                                                                                                                           |
| 5      |            | oximetry                     | 1978                                                                                                                                                                                                                                                                                                                                                           |
| 6      |            | oximeter                     | 960                                                                                                                                                                                                                                                                                                                                                            |
| 7      |            | oximetre                     | 0                                                                                                                                                                                                                                                                                                                                                              |
| 8      |            | oxymetry                     | 1978                                                                                                                                                                                                                                                                                                                                                           |
| 9      |            | oxymeter                     | 41                                                                                                                                                                                                                                                                                                                                                             |
| 10     |            | oxymetre                     | 2                                                                                                                                                                                                                                                                                                                                                              |
| 11     |            | blood oxygen saturation      | 2514                                                                                                                                                                                                                                                                                                                                                           |
| 12     |            | arterial oxygen saturation   | 4182                                                                                                                                                                                                                                                                                                                                                           |
| 13     |            | blood gas monitoring         | 198                                                                                                                                                                                                                                                                                                                                                            |
| 14     |            | blood gas analysis           | 1433                                                                                                                                                                                                                                                                                                                                                           |
| 15     |            | analysis blood gas           | 1413                                                                                                                                                                                                                                                                                                                                                           |
| 16     |            | spo2                         | 1883                                                                                                                                                                                                                                                                                                                                                           |
| 17     |            | spo2                         | 1883                                                                                                                                                                                                                                                                                                                                                           |
| 18     |            |                              | 1 or 2 or 3 or 4 or 5 or 6 or 7 or 8 or 9 or 10 or 11 or 12 or 13 or 14 or 15 or 16 or 17<br>hypoxemia OR hypoxaemia OR anoxia OR hypoxia OR oximetry OR oximeter OR oximetre OR oxymetry OR oxymeter OR oxymetre OR blood oxygen saturation OR arterial oxygen saturation OR blood gas monitoring OR blood gas analysis OR analysis blood gas OR spo2 OR spo2 |
| 19     | Pneumonia  | pneumonia                    | 10129                                                                                                                                                                                                                                                                                                                                                          |
| 20     |            | "severe pneumonia"           | 1707                                                                                                                                                                                                                                                                                                                                                           |
| 21     |            | "severe disease"             | 40422                                                                                                                                                                                                                                                                                                                                                          |
| 22     |            | "very severe disease"        | 6447                                                                                                                                                                                                                                                                                                                                                           |
| 23     |            | bronchiolitis                | 447                                                                                                                                                                                                                                                                                                                                                            |
| 24     |            | acute respiratory infection  | 2159                                                                                                                                                                                                                                                                                                                                                           |
| 25     |            | ari                          | 406                                                                                                                                                                                                                                                                                                                                                            |
| 26     |            | acute respiratory infections | 2159                                                                                                                                                                                                                                                                                                                                                           |



|    |                                     |                                                                                                                                                                                                                                                                                                                                                                                                                                                                                                                                                                                                                                                                                                                                                                                                                                                                                                                                                                                                           |         |
|----|-------------------------------------|-----------------------------------------------------------------------------------------------------------------------------------------------------------------------------------------------------------------------------------------------------------------------------------------------------------------------------------------------------------------------------------------------------------------------------------------------------------------------------------------------------------------------------------------------------------------------------------------------------------------------------------------------------------------------------------------------------------------------------------------------------------------------------------------------------------------------------------------------------------------------------------------------------------------------------------------------------------------------------------------------------------|---------|
| 27 |                                     | acute respiratory tract infection                                                                                                                                                                                                                                                                                                                                                                                                                                                                                                                                                                                                                                                                                                                                                                                                                                                                                                                                                                         | 2335    |
| 28 |                                     | arti                                                                                                                                                                                                                                                                                                                                                                                                                                                                                                                                                                                                                                                                                                                                                                                                                                                                                                                                                                                                      | 63      |
| 29 |                                     | acute respiratory tract infections                                                                                                                                                                                                                                                                                                                                                                                                                                                                                                                                                                                                                                                                                                                                                                                                                                                                                                                                                                        | 2335    |
| 30 |                                     | respiratory illness                                                                                                                                                                                                                                                                                                                                                                                                                                                                                                                                                                                                                                                                                                                                                                                                                                                                                                                                                                                       | 1233    |
| 31 |                                     | respiratory illnesses                                                                                                                                                                                                                                                                                                                                                                                                                                                                                                                                                                                                                                                                                                                                                                                                                                                                                                                                                                                     | 1233    |
| 32 |                                     | 19 or 20 or 21 or 22 or 23 or 24 or 25 or 26 or 27 or 28 or 29 or 30 or 31<br>pneumonia OR "severe pneumonia" OR "severe disease"<br>OR "very severe disease" OR bronchiolitis OR acute<br>respiratory infection OR ari OR acute respiratory<br>infections OR acute respiratory tract infection OR arti OR<br>acute respiratory tract infections OR respiratory illness OR<br>respiratory illnesses                                                                                                                                                                                                                                                                                                                                                                                                                                                                                                                                                                                                       | 9,179   |
| 33 | children<br>under 5<br>years of age | child                                                                                                                                                                                                                                                                                                                                                                                                                                                                                                                                                                                                                                                                                                                                                                                                                                                                                                                                                                                                     | 85169   |
| 34 |                                     | children                                                                                                                                                                                                                                                                                                                                                                                                                                                                                                                                                                                                                                                                                                                                                                                                                                                                                                                                                                                                  | 85169   |
| 35 |                                     | infant                                                                                                                                                                                                                                                                                                                                                                                                                                                                                                                                                                                                                                                                                                                                                                                                                                                                                                                                                                                                    | 14246   |
| 36 |                                     | infants                                                                                                                                                                                                                                                                                                                                                                                                                                                                                                                                                                                                                                                                                                                                                                                                                                                                                                                                                                                                   | 14246   |
| 37 |                                     | pediatric                                                                                                                                                                                                                                                                                                                                                                                                                                                                                                                                                                                                                                                                                                                                                                                                                                                                                                                                                                                                 | 15308   |
| 38 |                                     | pediatrics                                                                                                                                                                                                                                                                                                                                                                                                                                                                                                                                                                                                                                                                                                                                                                                                                                                                                                                                                                                                | 6618    |
| 39 |                                     | paediatric                                                                                                                                                                                                                                                                                                                                                                                                                                                                                                                                                                                                                                                                                                                                                                                                                                                                                                                                                                                                | 6609    |
| 40 |                                     | paediatrics                                                                                                                                                                                                                                                                                                                                                                                                                                                                                                                                                                                                                                                                                                                                                                                                                                                                                                                                                                                               | 6618    |
| 41 |                                     | 33 or 34 or 35 or 36 or 37 or 38 or 39 or 40<br>child OR children OR infant OR infants OR pediatric OR<br>pediatrics OR paediatric OR paediatrics                                                                                                                                                                                                                                                                                                                                                                                                                                                                                                                                                                                                                                                                                                                                                                                                                                                         | 89244   |
| 42 |                                     | developing country OR developing countries OR low-and<br>middle income country OR low-and middle income<br>countries OR LMIC OR LMICs OR low income country OR<br>low income countries OR middle income country OR<br>middle income countries OR lower middle income country<br>OR lower middle income countries OR upper middle<br>income country OR upper middle income countries OR<br>Afghanistan OR Albania OR Albania OR American Samoa<br>OR Angola OR Armenia OR Azerbaijan OR Bangladesh OR<br>Belarus OR Belize OR Benin OR Bhutan OR Bolivia OR<br>Bosnia and Herzegovina OR Botswana OR Brazil OR<br>Bulgaria OR Burkina Faso OR Burundi OR Cabo Verde OR<br>Cambodia OR Cameroon OR Central African Republic OR<br>Chad OR China OR Colombia OR Comoros OR DRC OR<br>Congo OR Costa Rica OR Ivory Coast OR Cuba OR Djibouti<br>OR Dominica OR Dominican Republic OR Ecuador OR<br>Egypt OR El Salvador OR Guinea OR Eritrea OR Ethiopia OR<br>Fiji OR Gabon OR Gambia OR Georgia OR Ghana OR | 154,847 |

|    |  |                                                                                                                                                                                                                                                                                                                                                                                                                                                                                                                                                                                                                                                                                                                                                                                                                                                                                                                                                                                                                                                                                                                                     |    |
|----|--|-------------------------------------------------------------------------------------------------------------------------------------------------------------------------------------------------------------------------------------------------------------------------------------------------------------------------------------------------------------------------------------------------------------------------------------------------------------------------------------------------------------------------------------------------------------------------------------------------------------------------------------------------------------------------------------------------------------------------------------------------------------------------------------------------------------------------------------------------------------------------------------------------------------------------------------------------------------------------------------------------------------------------------------------------------------------------------------------------------------------------------------|----|
|    |  | <p>Grenada OR Guatemala OR Guinea OR Guinea-Bissau OR Guyana OR Haiti OR Honduras OR India OR Indonesia OR Iran OR Iraq OR Jamaica OR Jordan OR Kazakhstan OR Kenya OR Kiribati OR Korea OR Kosovo OR Kyrgyz OR Lao OR Lebanon OR Lesotho OR Liberia OR Libya OR Macedonia, FYR OR Madagascar OR Malawi OR Malaysia OR Maldives OR Mali OR Marshall Islands OR Mauritania OR Mauritius OR Mexico OR Micronesia OR Moldova OR Mongolia OR Montenegro OR Morocco OR Mozambique OR Myanmar OR Namibia OR Nauru OR Nepal OR Nicaragua OR Niger OR Nigeria OR Pakistan OR Papua New Guinea OR Paraguay OR Peru OR Philippines OR Romania OR Russia OR Rwanda OR Samoa OR Timor OR Timor-Leste OR Senegal OR Serbia OR Sierra Leone OR Solomon Islands OR Somalia OR South Africa OR Sudan OR Sri Lanka OR Saint Lucia OR St. Vincent and the Grenadines OR Sudan OR Suriname OR Swaziland OR Syria OR Tajikistan OR Tanzania OR Thailand OR Timor-Leste OR Togo OR Tonga OR Tunisia OR Turkey OR Turkmenistan OR Tuvalu OR Uganda OR Ukraine OR Uzbekistan OR Vanuatu OR Venezuela OR Vietnam OR Gaza OR Yemen OR Zambia OR Zimbabwe</p> |    |
| 43 |  | <p>18 AND 32 AND 41 AND 42<br/> (hypoxemia OR hypoxaemia OR anoxia OR hypoxia OR oximetry OR oximeter OR oximetre OR oxymetry OR oxymeter OR oxymetre OR blood oxygen saturation OR arterial oxygen saturation OR blood gas monitoring OR blood gas analysis OR analysis blood gas OR spo2 OR spo2) AND (pneumonia OR "severe pneumonia" OR "severe disease" OR "very severe disease" OR bronchiolitis OR acute respiratory infection OR ari OR acute respiratory infections OR acute respiratory tract infection OR arti OR acute respiratory tract infections OR respiratory illness OR respiratory illnesses) AND (child OR children OR infant OR infants OR pediatric OR pediatrics OR paediatric OR paediatrics) AND (developing country OR Developing countries OR low-and middle income country OR low-and middle income countries OR LMIC OR LMICs OR low income country OR low income countries OR middle income country OR middle income countries OR lower middle income country OR lower middle income countries</p>                                                                                                    | 85 |

|  |  |                                                                                                                                                                                                                                                                                                                                                                                                                                                                                                                                                                                                                                                                                                                                                                                                                                                                                                                                                                                                                                                                                                                                                                                                                                                                                                                                                                                                                                                                                                                                                                                                                                                                                                                                                                                             |  |
|--|--|---------------------------------------------------------------------------------------------------------------------------------------------------------------------------------------------------------------------------------------------------------------------------------------------------------------------------------------------------------------------------------------------------------------------------------------------------------------------------------------------------------------------------------------------------------------------------------------------------------------------------------------------------------------------------------------------------------------------------------------------------------------------------------------------------------------------------------------------------------------------------------------------------------------------------------------------------------------------------------------------------------------------------------------------------------------------------------------------------------------------------------------------------------------------------------------------------------------------------------------------------------------------------------------------------------------------------------------------------------------------------------------------------------------------------------------------------------------------------------------------------------------------------------------------------------------------------------------------------------------------------------------------------------------------------------------------------------------------------------------------------------------------------------------------|--|
|  |  | <p>OR upper middle income country OR upper middle income countries OR Afghanistan OR Albania OR Albania OR “American Samoa” OR Angola OR Armenia OR Azerbaijan OR Bangladesh OR Belarus OR Belize OR Benin OR Bhutan OR Bolivia OR Bosnia and Herzegovina OR Botswana OR Brazil OR Bulgaria OR Burkina Faso OR Burundi OR Cabo Verde OR Cambodia OR Cameroon OR Central African Republic OR Chad OR China OR Colombia OR Comoros OR DRC OR Congo OR Costa Rica OR Ivory Coast OR Cuba OR Djibouti OR Dominica OR Dominican Republic OR Ecuador OR Egypt OR El Salvador OR Guinea OR Eritrea OR Ethiopia OR Fiji OR Gabon OR Gambia OR Georgia OR Ghana OR Grenada OR Guatemala OR Guinea OR Guinea-Bissau OR Guyana OR Haiti OR Honduras OR India OR Indonesia OR Iran OR Iraq OR Jamaica OR Jordan OR Kazakhstan OR Kenya OR Kiribati OR Korea OR Kosovo OR Kyrgyz OR Lao OR Lebanon OR Lesotho OR Liberia OR Libya OR Macedonia, FYR OR Madagascar OR Malawi OR Malaysia OR Maldives OR Mali OR Marshall Islands OR Mauritania OR Mauritius OR Mexico OR Micronesia OR Moldova OR Mongolia OR Montenegro OR Morocco OR Mozambique OR Myanmar OR Namibia OR Nauru OR Nepal OR Nicaragua OR Niger OR Nigeria OR Pakistan OR Papua New Guinea OR Paraguay OR Peru OR Philippines OR Romania OR Russia OR Rwanda OR Samoa OR Timor OR Timor-Leste OR Senegal OR Serbia OR Sierra Leone OR Solomon Islands OR Somalia OR South Africa OR Sudan OR Sri Lanka OR Saint Lucia OR St. Vincent and the Grenadines OR Sudan OR Suriname OR Swaziland OR Syria OR Tajikistan OR Tanzania OR Thailand OR Timor-Leste OR Togo OR Tonga OR Tunisia OR Turkey OR Turkmenistan OR Tuvalu OR Uganda OR Ukraine OR Uzbekistan OR Vanuatu OR Venezuela OR Vietnam OR Gaza OR Yemen OR Zambia OR Zimbabwe)</p> |  |
|--|--|---------------------------------------------------------------------------------------------------------------------------------------------------------------------------------------------------------------------------------------------------------------------------------------------------------------------------------------------------------------------------------------------------------------------------------------------------------------------------------------------------------------------------------------------------------------------------------------------------------------------------------------------------------------------------------------------------------------------------------------------------------------------------------------------------------------------------------------------------------------------------------------------------------------------------------------------------------------------------------------------------------------------------------------------------------------------------------------------------------------------------------------------------------------------------------------------------------------------------------------------------------------------------------------------------------------------------------------------------------------------------------------------------------------------------------------------------------------------------------------------------------------------------------------------------------------------------------------------------------------------------------------------------------------------------------------------------------------------------------------------------------------------------------------------|--|

Final search output: 85

## Search Summary 6

Name of the database

SCOPUS (Advanced)

Date of search

29 September, 2021

Timeline

Not applicable

Search Language

| Line # | Theme      | Search Language                                                                                                                                                                                                                                                                                                                                                                                                                                              | Output # |
|--------|------------|--------------------------------------------------------------------------------------------------------------------------------------------------------------------------------------------------------------------------------------------------------------------------------------------------------------------------------------------------------------------------------------------------------------------------------------------------------------|----------|
| 1      | Hypoxaemia | hypoxemia                                                                                                                                                                                                                                                                                                                                                                                                                                                    | 77,572   |
| 2      |            | hypoxaemia                                                                                                                                                                                                                                                                                                                                                                                                                                                   | 18,843   |
| 3      |            | anoxia                                                                                                                                                                                                                                                                                                                                                                                                                                                       | 126,145  |
| 4      |            | hypoxia                                                                                                                                                                                                                                                                                                                                                                                                                                                      | 703,759  |
| 5      |            | oximetry                                                                                                                                                                                                                                                                                                                                                                                                                                                     | 58,162   |
| 6      |            | oximeter                                                                                                                                                                                                                                                                                                                                                                                                                                                     | 15,210   |
| 7      |            | oximetre                                                                                                                                                                                                                                                                                                                                                                                                                                                     | 1        |
| 8      |            | oxymetry                                                                                                                                                                                                                                                                                                                                                                                                                                                     | 2,156    |
| 9      |            | oxymeter                                                                                                                                                                                                                                                                                                                                                                                                                                                     | 400      |
| 10     |            | oxymetre                                                                                                                                                                                                                                                                                                                                                                                                                                                     | 93       |
| 11     |            | "blood oxygen saturation"                                                                                                                                                                                                                                                                                                                                                                                                                                    | 5,699    |
| 12     |            | "arterial oxygen saturation"                                                                                                                                                                                                                                                                                                                                                                                                                                 | 16,179   |
| 13     |            | "blood gas monitoring"                                                                                                                                                                                                                                                                                                                                                                                                                                       | 3,389    |
| 14     |            | "blood gas analysis"                                                                                                                                                                                                                                                                                                                                                                                                                                         | 38,710   |
| 15     |            | "analysis blood gas"                                                                                                                                                                                                                                                                                                                                                                                                                                         | 23       |
| 16     |            | SpO2                                                                                                                                                                                                                                                                                                                                                                                                                                                         | 9,072    |
| 17     |            | SPO2                                                                                                                                                                                                                                                                                                                                                                                                                                                         | 9,072    |
| 18     |            | 1 or 2 or 3 or 4 or 5 or 6 or 7 or 8 or 9 or 10 or 11 or 12 or 13 or 14 or 15 or 16 or 17<br>( hypoxemia ) OR ( hypoxaemia ) OR ( anoxia ) OR ( hypoxia )<br>OR ( oximetry ) OR ( oximeter ) OR ( oximetre ) OR ( oxymetr<br>y ) OR ( oxymeter ) OR ( oxymetre ) OR ( "blood oxygen<br>saturation" ) OR ( "arterial oxygen saturation" ) OR ( "blood<br>gas monitoring" ) OR ( "blood gas analysis" ) OR ( "analysis<br>blood gas" ) OR ( spo2 ) OR ( spo2 ) | 910,266  |
| 19     | Pneumonia  | pneumonia                                                                                                                                                                                                                                                                                                                                                                                                                                                    | 608,133  |
| 20     |            | "severe pneumonia"                                                                                                                                                                                                                                                                                                                                                                                                                                           | 15,974   |
| 21     |            | "severe disease"                                                                                                                                                                                                                                                                                                                                                                                                                                             | 43,407   |
| 22     |            | "very severe disease"                                                                                                                                                                                                                                                                                                                                                                                                                                        | 302      |

|    |                                          |                                                                                                                                                                                                                                                                                                                                                                                                                                                                                                                                                                                                                                                                                                                                                                           |                                                                                                                                                                                        |
|----|------------------------------------------|---------------------------------------------------------------------------------------------------------------------------------------------------------------------------------------------------------------------------------------------------------------------------------------------------------------------------------------------------------------------------------------------------------------------------------------------------------------------------------------------------------------------------------------------------------------------------------------------------------------------------------------------------------------------------------------------------------------------------------------------------------------------------|----------------------------------------------------------------------------------------------------------------------------------------------------------------------------------------|
| 23 |                                          | bronchiolitis                                                                                                                                                                                                                                                                                                                                                                                                                                                                                                                                                                                                                                                                                                                                                             | 51,454                                                                                                                                                                                 |
| 24 |                                          | "acute respiratory infection"                                                                                                                                                                                                                                                                                                                                                                                                                                                                                                                                                                                                                                                                                                                                             | 28,443                                                                                                                                                                                 |
| 25 |                                          | ARI                                                                                                                                                                                                                                                                                                                                                                                                                                                                                                                                                                                                                                                                                                                                                                       | 176,104                                                                                                                                                                                |
| 26 |                                          | "acute respiratory infections"                                                                                                                                                                                                                                                                                                                                                                                                                                                                                                                                                                                                                                                                                                                                            | 28,443                                                                                                                                                                                 |
| 27 |                                          | "acute respiratory tract infection"                                                                                                                                                                                                                                                                                                                                                                                                                                                                                                                                                                                                                                                                                                                                       | 13,820                                                                                                                                                                                 |
| 28 |                                          | ARTI                                                                                                                                                                                                                                                                                                                                                                                                                                                                                                                                                                                                                                                                                                                                                                      | 30,077                                                                                                                                                                                 |
| 29 |                                          | "acute respiratory tract infections"                                                                                                                                                                                                                                                                                                                                                                                                                                                                                                                                                                                                                                                                                                                                      | 13,820                                                                                                                                                                                 |
| 30 |                                          | "respiratory illness*"                                                                                                                                                                                                                                                                                                                                                                                                                                                                                                                                                                                                                                                                                                                                                    | 38,309                                                                                                                                                                                 |
| 31 |                                          | "respiratory illnesses*"                                                                                                                                                                                                                                                                                                                                                                                                                                                                                                                                                                                                                                                                                                                                                  | 9,267                                                                                                                                                                                  |
| 32 |                                          | 19 or 20 or 21 or 22 or 23 or 24 or 25 or 26 or 27 or 28 or 29 or 30 or 31<br>( pneumonia ) OR ( "severe pneumonia" ) OR ( "severe disease" ) OR ( "very severe disease" ) OR ( bronchiolitis ) OR ( "acute respiratory infection" ) OR ( ari ) OR ( "acute respiratory infections" ) OR ( "acute respiratory infections" ) OR ( "acute respiratory tract infection" ) OR ( arti ) OR ( "acute respiratory tract infections" ) OR ( "respiratory illness*" ) OR ( "respiratory illnesses*" )                                                                                                                                                                                                                                                                              | 910,802                                                                                                                                                                                |
| 33 | children<br>under 5<br>years of age      | Child*                                                                                                                                                                                                                                                                                                                                                                                                                                                                                                                                                                                                                                                                                                                                                                    | 7,610,183                                                                                                                                                                              |
| 34 |                                          | Children*                                                                                                                                                                                                                                                                                                                                                                                                                                                                                                                                                                                                                                                                                                                                                                 | 5,027,116                                                                                                                                                                              |
| 35 |                                          | Infant*                                                                                                                                                                                                                                                                                                                                                                                                                                                                                                                                                                                                                                                                                                                                                                   | 2,626,853                                                                                                                                                                              |
| 36 |                                          | Infants*                                                                                                                                                                                                                                                                                                                                                                                                                                                                                                                                                                                                                                                                                                                                                                  | 1,074,853                                                                                                                                                                              |
| 37 |                                          | Pediatric*                                                                                                                                                                                                                                                                                                                                                                                                                                                                                                                                                                                                                                                                                                                                                                | 3,941,378                                                                                                                                                                              |
| 38 |                                          | Pediatrics*                                                                                                                                                                                                                                                                                                                                                                                                                                                                                                                                                                                                                                                                                                                                                               | 2,339,629                                                                                                                                                                              |
| 39 |                                          | Paediatric*                                                                                                                                                                                                                                                                                                                                                                                                                                                                                                                                                                                                                                                                                                                                                               | 985,834                                                                                                                                                                                |
| 40 |                                          | Paediatrics*                                                                                                                                                                                                                                                                                                                                                                                                                                                                                                                                                                                                                                                                                                                                                              | 437,141                                                                                                                                                                                |
| 41 |                                          |                                                                                                                                                                                                                                                                                                                                                                                                                                                                                                                                                                                                                                                                                                                                                                           | 33 or 34 or 35 or 36 or 37 or 38 or 39 or 40<br>( child* ) OR ( children* ) OR ( infant* ) OR ( infants* ) OR ( pediatric* ) OR ( pediatrics* ) OR ( paediatric* ) OR ( paediatrics* ) |
| 42 | low and<br>middle<br>income<br>countries | Albania OR Algeria OR Angola OR American Samoa OR Armenia OR Azerbaijan OR Bangladesh OR Benin OR Belarus OR Belize OR Bhutan OR Bolivia OR "Bosnia and Herzegovina" OR Botswana OR Brazil OR Bulgaria OR "Burkina Faso" OR Burundi OR Cambodia OR Cameroon OR "Cape Verde" OR "Central African Republic" OR Chad OR China OR Colombia OR Comoros OR "Congo, Dem. Rep" OR "Congo, Rep." OR "Costa Rica" OR "Cote d'Ivoire" OR Cuba OR Djibouti OR Dominica OR "Dominican Republic" OR "Ecuador" OR " Egypt, Arab Rep." OR "El Salvador" OR Eritrea OR Ethiopia OR Ethiopia OR Fiji OR Gabon OR "Gambia, The" OR Georgia OR Ghana OR Grenada OR Guatemala OR Guinea OR Guyana OR "Guinea-Bissau " OR Haiti OR Honduras OR India OR Maldives OR Indonesia OR "Iran, Islamic | 758,189                                                                                                                                                                                |

|    |  |                                                                                                                                                                                                                                                                                                                                                                                                                                                                                                                                                                                                                                                                                                                                                                                                                                                                                                                                                                                                                                                                                                                                                                                                                                                                                                                                                            |     |
|----|--|------------------------------------------------------------------------------------------------------------------------------------------------------------------------------------------------------------------------------------------------------------------------------------------------------------------------------------------------------------------------------------------------------------------------------------------------------------------------------------------------------------------------------------------------------------------------------------------------------------------------------------------------------------------------------------------------------------------------------------------------------------------------------------------------------------------------------------------------------------------------------------------------------------------------------------------------------------------------------------------------------------------------------------------------------------------------------------------------------------------------------------------------------------------------------------------------------------------------------------------------------------------------------------------------------------------------------------------------------------|-----|
|    |  | Rep." OR Iraq OR Jamaica OR Jordan OR Kazakhstan OR Kenya OR Kiribati OR "Korea, Dem. People's Rep." OR Kosovo OR "Kyrgyz Republic" OR "Lao PDR" OR Lebanon OR Lesotho OR Liberia OR Libya OR "Macedonia, FYR" OR Madagascar OR Malaysia OR Malawi OR Mali OR "Marshall Islands" OR Mauritania OR Mauritius OR Mexico OR "Micronesia, Fed. Sts." OR Moldova OR Mongolia OR Montenegro OR Morocco OR Mozambique OR Myanmar OR Namibia OR Nepal OR Nauru OR Nicaragua OR Niger OR Nigeria OR Pakistan OR "Papua New Guinea" OR Paraguay OR Peru OR Philippines OR Romania OR "Russian Federation" OR Rwanda OR Samoa OR " São Tomé and Príncipe" OR Senegal OR Serbia OR " Sierra Leone" OR Somalia OR Grenadines OR "Samoan Islands" OR " South Africa" OR "St. Lucia" OR "St. Vincent and the Grenadines" OR Sudan OR Suriname OR Swaziland OR " Syrian Arab Republic" OR "Sri Lanka" OR Tajikistan OR Tanzania OR Thailand OR Togo OR Tonga OR Tunisia OR Turkey OR Turkmenistan OR Tuvalu OR "Timor-Leste" OR Uganda OR Ukraine OR Uzbekistan OR Vanuatu OR Venezuela, RB OR Vietnam OR "West Bank and Gaza" OR "Yemen, Rep." OR Zambia OR Zimbabwe OR (developing countr*) OR ("low-and middle income countr*") OR (LMIC*) OR ("low income countr*") OR ("middle income countr*") OR ("lower middle income countr*") OR ("upper middle income countr*") |     |
| 43 |  | 18 AND 32 AND 41 AND 42<br>(with filter<br>NURSING, MEDICINE-Limit to<br>HUMAN, HUMANS- Limit to<br>JOURNAL- Limit to)                                                                                                                                                                                                                                                                                                                                                                                                                                                                                                                                                                                                                                                                                                                                                                                                                                                                                                                                                                                                                                                                                                                                                                                                                                     | 665 |

Final search output : 665

### Search Summary 7

Name of the database

CINHAL

Date of search

30 September, 2021

Timeline

Not applicable

Search Language

| Line # | Theme      | Search Language                                                                                                                                                                                                                                                                                                                                                          | Output # |
|--------|------------|--------------------------------------------------------------------------------------------------------------------------------------------------------------------------------------------------------------------------------------------------------------------------------------------------------------------------------------------------------------------------|----------|
| 1      | Hypoxaemia | hypoxemia                                                                                                                                                                                                                                                                                                                                                                | 3,895    |
| 2      |            | hypoxaemia                                                                                                                                                                                                                                                                                                                                                               | 678      |
| 3      |            | anoxia                                                                                                                                                                                                                                                                                                                                                                   | 7,135    |
| 4      |            | hypoxia                                                                                                                                                                                                                                                                                                                                                                  | 14,894   |
| 5      |            | oximetry                                                                                                                                                                                                                                                                                                                                                                 | 6,768    |
| 6      |            | oximeter                                                                                                                                                                                                                                                                                                                                                                 | 3,134    |
| 7      |            | oximetre                                                                                                                                                                                                                                                                                                                                                                 | 0        |
| 8      |            | oxymetry                                                                                                                                                                                                                                                                                                                                                                 | 47       |
| 9      |            | oxymeter                                                                                                                                                                                                                                                                                                                                                                 | 19       |
| 10     |            | oxymetre                                                                                                                                                                                                                                                                                                                                                                 | 4        |
| 11     |            | blood oxygen saturation                                                                                                                                                                                                                                                                                                                                                  | 1,351    |
| 12     |            | arterial oxygen saturation                                                                                                                                                                                                                                                                                                                                               | 990      |
| 13     |            | blood gas monitoring                                                                                                                                                                                                                                                                                                                                                     | 645      |
| 14     |            | blood gas analysis                                                                                                                                                                                                                                                                                                                                                       | 5,354    |
| 15     |            | analysis blood gas                                                                                                                                                                                                                                                                                                                                                       | 1,293    |
| 16     |            | SpO2                                                                                                                                                                                                                                                                                                                                                                     | 1,718    |
| 17     |            | SPO2                                                                                                                                                                                                                                                                                                                                                                     | 1,718    |
| 18     |            | 1 or 2 or 3 or 4 or 5 or 6 or 7 or 8 or 9 or 10 or 11 or 12 or 13 or 14 or 15 or 16 or 17<br>hypoxemia OR hypoxaemia OR anoxia OR hypoxia OR oximetry OR oximeter OR oximetre OR oxymetry OR oxymeter OR oxymetre OR (blood oxygen saturation) OR (arterial oxygen saturation) OR (blood gas monitoring) OR (blood gas analysis) OR (analysis blood gas) OR SpO2 OR SPO2 | 33,731   |
| 19     | Pneumonia  | pneumonia                                                                                                                                                                                                                                                                                                                                                                | 46,202   |
| 20     |            | severe pneumonia                                                                                                                                                                                                                                                                                                                                                         | 786      |
| 21     |            | severe disease                                                                                                                                                                                                                                                                                                                                                           | 3,915    |
| 22     |            | very severe disease                                                                                                                                                                                                                                                                                                                                                      | 45       |

|    |                                                    |                                                                                                                                                                                                                                                                                                                                                                                                                                                                                                                                                                                                                                                                                                                                                                                                                                                                                                                                                                                             |         |
|----|----------------------------------------------------|---------------------------------------------------------------------------------------------------------------------------------------------------------------------------------------------------------------------------------------------------------------------------------------------------------------------------------------------------------------------------------------------------------------------------------------------------------------------------------------------------------------------------------------------------------------------------------------------------------------------------------------------------------------------------------------------------------------------------------------------------------------------------------------------------------------------------------------------------------------------------------------------------------------------------------------------------------------------------------------------|---------|
| 23 |                                                    | bronchiolitis                                                                                                                                                                                                                                                                                                                                                                                                                                                                                                                                                                                                                                                                                                                                                                                                                                                                                                                                                                               | 3,219   |
| 24 |                                                    | acute respiratory infection                                                                                                                                                                                                                                                                                                                                                                                                                                                                                                                                                                                                                                                                                                                                                                                                                                                                                                                                                                 | 1,114   |
| 25 |                                                    | ARI                                                                                                                                                                                                                                                                                                                                                                                                                                                                                                                                                                                                                                                                                                                                                                                                                                                                                                                                                                                         | 4,183   |
| 26 |                                                    | acute respiratory infections                                                                                                                                                                                                                                                                                                                                                                                                                                                                                                                                                                                                                                                                                                                                                                                                                                                                                                                                                                | 1,114   |
| 27 |                                                    | acute respiratory tract infection                                                                                                                                                                                                                                                                                                                                                                                                                                                                                                                                                                                                                                                                                                                                                                                                                                                                                                                                                           | 386     |
| 28 |                                                    | ARTI                                                                                                                                                                                                                                                                                                                                                                                                                                                                                                                                                                                                                                                                                                                                                                                                                                                                                                                                                                                        | 6,416   |
| 29 |                                                    | acute respiratory tract infections                                                                                                                                                                                                                                                                                                                                                                                                                                                                                                                                                                                                                                                                                                                                                                                                                                                                                                                                                          | 386     |
| 30 |                                                    | respiratory illness*                                                                                                                                                                                                                                                                                                                                                                                                                                                                                                                                                                                                                                                                                                                                                                                                                                                                                                                                                                        | 4,802   |
| 31 |                                                    | respiratory illnesses*                                                                                                                                                                                                                                                                                                                                                                                                                                                                                                                                                                                                                                                                                                                                                                                                                                                                                                                                                                      | 627     |
| 32 |                                                    | 19 or 20 or 21 or 22 or 23 or 24 or 25 or 26 or 27 or 28 or 29 or 30 or 31<br>pneumonia OR (severe pneumonia) OR (severe disease)<br>OR (very severe disease) OR bronchiolitis OR (acute<br>respiratory infection) OR ari OR (acute respiratory<br>infections) OR (acute respiratory tract infection) OR arti<br>OR (acute respiratory tract infections) OR (respiratory<br>illness*) OR (respiratory illnesses*)                                                                                                                                                                                                                                                                                                                                                                                                                                                                                                                                                                           | 67,715  |
| 33 | children<br>under 5<br>years of age                | Child*                                                                                                                                                                                                                                                                                                                                                                                                                                                                                                                                                                                                                                                                                                                                                                                                                                                                                                                                                                                      | 848,219 |
| 34 |                                                    | Children*                                                                                                                                                                                                                                                                                                                                                                                                                                                                                                                                                                                                                                                                                                                                                                                                                                                                                                                                                                                   | 401,406 |
| 35 |                                                    | Infant*                                                                                                                                                                                                                                                                                                                                                                                                                                                                                                                                                                                                                                                                                                                                                                                                                                                                                                                                                                                     | 314,473 |
| 36 |                                                    | Infants*                                                                                                                                                                                                                                                                                                                                                                                                                                                                                                                                                                                                                                                                                                                                                                                                                                                                                                                                                                                    | 76,280  |
| 37 |                                                    | Pediatric*                                                                                                                                                                                                                                                                                                                                                                                                                                                                                                                                                                                                                                                                                                                                                                                                                                                                                                                                                                                  | 182,754 |
| 38 |                                                    | Pediatrics*                                                                                                                                                                                                                                                                                                                                                                                                                                                                                                                                                                                                                                                                                                                                                                                                                                                                                                                                                                                 | 33,177  |
| 39 |                                                    | Paediatric*                                                                                                                                                                                                                                                                                                                                                                                                                                                                                                                                                                                                                                                                                                                                                                                                                                                                                                                                                                                 | 27,335  |
| 40 |                                                    | Paediatrics*                                                                                                                                                                                                                                                                                                                                                                                                                                                                                                                                                                                                                                                                                                                                                                                                                                                                                                                                                                                | 12,813  |
| 41 |                                                    | 33 or 34 or 35 or 36 or 37 or 38 or 39 or 40<br>Child* OR children* OR infant* OR infants* OR pediatric*<br>OR pediatrics* OR paediatric* OR paediatrics*                                                                                                                                                                                                                                                                                                                                                                                                                                                                                                                                                                                                                                                                                                                                                                                                                                   | 998,872 |
| 42 | <b>low and<br/>middle<br/>income<br/>countries</b> | Albania OR Algeria OR Angola OR American Samoa OR<br>Armenia OR Azerbaijan OR Bangladesh OR Benin OR<br>Belarus OR Belize OR Bhutan OR Bolivia OR "Bosnia and<br>Herzegovina" OR Botswana OR Brazil OR Bulgaria OR<br>"Burkina Faso" OR Burundi OR Cambodia OR Cameroon<br>OR "Cape Verde" OR "Central African Republic" OR Chad<br>OR China OR Colombia OR Comoros OR "Congo, Dem.<br>Rep" OR "Congo, Rep." OR "Costa Rica" OR "Cote<br>d'Ivoire" OR Cuba OR Djibouti OR Dominica OR<br>"Dominican Republic" OR "Ecuador" OR " Egypt, Arab<br>Rep." OR "El Salvador" OR Eritrea OR Ethiopia OR<br>Ethiopia OR Fiji OR Gabon OR "Gambia, The" OR Georgia<br>OR Ghana OR Grenada OR Guatemala OR Guinea OR<br>Guyana OR "Guinea-Bissau " OR Haiti OR Honduras OR<br>India OR Maldives OR Indonesia OR "Iran, Islamic Rep."<br>OR Iraq OR Jamaica OR Jordan OR Kazakhstan OR Kenya<br>OR Kiribati OR "Korea, Dem. People's Rep." OR Kosovo<br>OR "Kyrgyz Republic" OR "Lao PDR" OR Lebanon OR | 438,431 |



|    |  |                                                                                                                                                                                                                                                                                                                                                                                                                                                                                                                                                                                                                                                                                                                                                                                                                                                                                                                                                                                                                                                                                                                                                                                         |    |
|----|--|-----------------------------------------------------------------------------------------------------------------------------------------------------------------------------------------------------------------------------------------------------------------------------------------------------------------------------------------------------------------------------------------------------------------------------------------------------------------------------------------------------------------------------------------------------------------------------------------------------------------------------------------------------------------------------------------------------------------------------------------------------------------------------------------------------------------------------------------------------------------------------------------------------------------------------------------------------------------------------------------------------------------------------------------------------------------------------------------------------------------------------------------------------------------------------------------|----|
|    |  | <p>Lesotho OR Liberia OR Libya OR "Macedonia, FYR" OR Madagascar OR Malaysia OR Malawi OR Mali OR "Marshall Islands" OR Mauritania OR Mauritius OR Mexico OR "Micronesia, Fed. Sts." OR Moldova OR Mongolia OR Montenegro OR Morocco OR Mozambique OR Myanmar OR Namibia OR Nepal OR Nauru OR Nicaragua OR Niger OR Nigeria OR Pakistan OR "Papua New Guinea" OR Paraguay OR Peru OR Philippines OR Romania OR "Russian Federation" OR Rwanda OR Samoa OR " São Tomé and Príncipe" OR Senegal OR Serbia OR " Sierra Leone" OR Somalia OR Grenadines OR "Samoa Islands" OR " South Africa" OR "St. Lucia" OR "St. Vincent and the Grenadines" OR Sudan OR Suriname OR Swaziland OR " Syrian Arab Republic" OR "Sri Lanka" OR Tajikistan OR Tanzania OR Thailand OR Togo OR Tonga OR Tunisia OR Turkey OR Turkmenistan OR Tuvalu OR "Timor-Leste" OR Uganda OR Ukraine OR Uzbekistan OR Vanuatu OR Venezuela, RB OR Vietnam OR "West Bank and Gaza" OR "Yemen, Rep." OR Zambia OR Zimbabwe OR (developing countr*) OR (low-and middle income countr*) OR (LMIC*) OR (low income countr*) OR (middle income countr*) OR (lower middle income countr*) OR (upper middle income countr*)</p> |    |
| 43 |  | 18 AND 32 AND 41 AND 42                                                                                                                                                                                                                                                                                                                                                                                                                                                                                                                                                                                                                                                                                                                                                                                                                                                                                                                                                                                                                                                                                                                                                                 | 66 |

Final search output : 66

### Search Summary 8

Name of the database

PubMed (Advanced)

Date of search

29 September, 2021

Timeline

Not applicable

Search Language

| Line # | Theme      | Search Language            | Output #                                                                                                                                                                                                                                                                                                    |
|--------|------------|----------------------------|-------------------------------------------------------------------------------------------------------------------------------------------------------------------------------------------------------------------------------------------------------------------------------------------------------------|
| 1      | Hypoxaemia | hypoxemia                  | 181,951                                                                                                                                                                                                                                                                                                     |
| 2      |            | hypoxaemia                 | 181,951                                                                                                                                                                                                                                                                                                     |
| 3      |            | anoxia                     | 174,123                                                                                                                                                                                                                                                                                                     |
| 4      |            | hypoxia                    | 170,128                                                                                                                                                                                                                                                                                                     |
| 5      |            | oximetry                   | 20,991                                                                                                                                                                                                                                                                                                      |
| 6      |            | oximeter                   | 4,324                                                                                                                                                                                                                                                                                                       |
| 7      |            | oximetre                   | 0                                                                                                                                                                                                                                                                                                           |
| 8      |            | oxymetry                   | 21,276                                                                                                                                                                                                                                                                                                      |
| 9      |            | oxymeter                   | 157                                                                                                                                                                                                                                                                                                         |
| 10     |            | oxymetre                   | 11                                                                                                                                                                                                                                                                                                          |
| 11     |            | blood oxygen saturation    | 37,918                                                                                                                                                                                                                                                                                                      |
| 12     |            | arterial oxygen saturation | 17,275                                                                                                                                                                                                                                                                                                      |
| 13     |            | blood gas monitoring       | 13,164                                                                                                                                                                                                                                                                                                      |
| 14     |            | blood gas analysis         | 60,188                                                                                                                                                                                                                                                                                                      |
| 15     |            | analysis blood gas         | 60,188                                                                                                                                                                                                                                                                                                      |
| 16     |            | SpO2                       | 7,221                                                                                                                                                                                                                                                                                                       |
| 17     |            | SPO2                       | 7,221                                                                                                                                                                                                                                                                                                       |
| 18     |            |                            | Search (((((((((((((((((((hypoxemia) OR hypoxaemia) OR anoxia) OR hypoxia) OR oximetry) OR oximeter) OR oximetre) OR oxymetry) OR oxymeter) OR oxymetre) OR blood oxygen saturation) OR arterial oxygen saturation) OR blood gas monitoring) OR blood gas analysis) OR analysis blood gas) OR SpO2) OR SPO2 |
| 19     | Pneumonia  | pneumonia                  | 335,840                                                                                                                                                                                                                                                                                                     |
| 20     |            | severe pneumonia           | 64,569                                                                                                                                                                                                                                                                                                      |
| 21     |            | severe disease             | 763,868                                                                                                                                                                                                                                                                                                     |
| 22     |            | very severe disease        | 763,868                                                                                                                                                                                                                                                                                                     |
| 23     |            | bronchiolitis              | 14,288                                                                                                                                                                                                                                                                                                      |

|    |                                        |                                                                                                                                                                                                                                                                                                                                                                                                                                                                                                                                                                                                                                                                                                                                                                                                                                                                                                                                                                             |           |
|----|----------------------------------------|-----------------------------------------------------------------------------------------------------------------------------------------------------------------------------------------------------------------------------------------------------------------------------------------------------------------------------------------------------------------------------------------------------------------------------------------------------------------------------------------------------------------------------------------------------------------------------------------------------------------------------------------------------------------------------------------------------------------------------------------------------------------------------------------------------------------------------------------------------------------------------------------------------------------------------------------------------------------------------|-----------|
| 24 |                                        | acute respiratory infection                                                                                                                                                                                                                                                                                                                                                                                                                                                                                                                                                                                                                                                                                                                                                                                                                                                                                                                                                 | 86,480    |
| 25 |                                        | ARI                                                                                                                                                                                                                                                                                                                                                                                                                                                                                                                                                                                                                                                                                                                                                                                                                                                                                                                                                                         | 7,231     |
| 26 |                                        | acute respiratory infections                                                                                                                                                                                                                                                                                                                                                                                                                                                                                                                                                                                                                                                                                                                                                                                                                                                                                                                                                | 80,388    |
| 27 |                                        | acute respiratory tract infection                                                                                                                                                                                                                                                                                                                                                                                                                                                                                                                                                                                                                                                                                                                                                                                                                                                                                                                                           | 73,381    |
| 28 |                                        | ARTI                                                                                                                                                                                                                                                                                                                                                                                                                                                                                                                                                                                                                                                                                                                                                                                                                                                                                                                                                                        | 2,155     |
| 29 |                                        | acute respiratory tract infections                                                                                                                                                                                                                                                                                                                                                                                                                                                                                                                                                                                                                                                                                                                                                                                                                                                                                                                                          | 71,954    |
| 30 |                                        | respiratory illness*                                                                                                                                                                                                                                                                                                                                                                                                                                                                                                                                                                                                                                                                                                                                                                                                                                                                                                                                                        | 47,137    |
| 31 |                                        | respiratory illnesses*                                                                                                                                                                                                                                                                                                                                                                                                                                                                                                                                                                                                                                                                                                                                                                                                                                                                                                                                                      | 6,388     |
| 32 |                                        | Search (((((((((((pneumonia) OR severe pneumonia) OR severe disease) OR very severe disease) OR bronchiolitis) OR acute respiratory infection) OR ARI) OR acute respiratory infections) OR acute respiratory tract infection) OR ARTI) OR acute respiratory tract infections) OR respiratory illness*) OR respiratory illnesses*                                                                                                                                                                                                                                                                                                                                                                                                                                                                                                                                                                                                                                            | 1,122,148 |
| 33 | children                               | Child*                                                                                                                                                                                                                                                                                                                                                                                                                                                                                                                                                                                                                                                                                                                                                                                                                                                                                                                                                                      | 2,960,040 |
| 34 | under 5                                | Children*                                                                                                                                                                                                                                                                                                                                                                                                                                                                                                                                                                                                                                                                                                                                                                                                                                                                                                                                                                   | 1,515,039 |
| 35 | years of age                           | Infant*                                                                                                                                                                                                                                                                                                                                                                                                                                                                                                                                                                                                                                                                                                                                                                                                                                                                                                                                                                     | 1,351,126 |
| 36 |                                        | Infants*                                                                                                                                                                                                                                                                                                                                                                                                                                                                                                                                                                                                                                                                                                                                                                                                                                                                                                                                                                    | 282,393   |
| 37 |                                        | Pediatric*                                                                                                                                                                                                                                                                                                                                                                                                                                                                                                                                                                                                                                                                                                                                                                                                                                                                                                                                                                  | 988,382   |
| 38 |                                        | Pediatrics*                                                                                                                                                                                                                                                                                                                                                                                                                                                                                                                                                                                                                                                                                                                                                                                                                                                                                                                                                                 | 524,507   |
| 39 |                                        | Paediatric*                                                                                                                                                                                                                                                                                                                                                                                                                                                                                                                                                                                                                                                                                                                                                                                                                                                                                                                                                                 | 187,928   |
| 40 |                                        | Paediatrics*                                                                                                                                                                                                                                                                                                                                                                                                                                                                                                                                                                                                                                                                                                                                                                                                                                                                                                                                                                | 79,099    |
| 41 |                                        | Search (((((((Child*) OR Children*) OR Infant*) OR Infants*) OR Pediatric*) OR Pediatrics*) OR Paediatric*) OR Paediatrics*                                                                                                                                                                                                                                                                                                                                                                                                                                                                                                                                                                                                                                                                                                                                                                                                                                                 | 3,722,177 |
| 42 | <b>low and middle income countries</b> | Search (Albania OR Algeria OR Angola OR American Samoa OR Armenia OR Azerbaijan OR Bangladesh OR Benin OR Belarus OR Belize OR Bhutan OR Bolivia OR "Bosnia and Herzegovina" OR Botswana OR Brazil OR Bulgaria OR "Burkina Faso" OR Burundi OR Cambodia OR Cameroon OR "Cape Verde" OR "Central African Republic" OR Chad OR China OR Colombia OR Comoros OR "Congo, Dem. Rep" OR "Congo, Rep." OR "Costa Rica" OR "Cote d'Ivoire" OR Cuba OR Djibouti OR Dominica OR "Dominican Republic" OR "Ecuador" OR "Egypt, Arab Rep." OR "El Salvador" OR Eritrea OR Ethiopia OR Ethiopia OR Fiji OR Gabon OR "Gambia, The" OR Georgia OR Ghana OR Grenada OR Guatemala OR Guinea OR Guyana OR "Guinea-Bissau " OR Haiti OR Honduras OR India OR Maldives OR Indonesia OR "Iran, Islamic Rep." OR Iraq OR Jamaica OR Jordan OR Kazakhstan OR Kenya OR Kiribati OR "Korea, Dem. People's Rep." OR Kosovo OR "Kyrgyz Republic" OR "Lao PDR" OR Lebanon OR Lesotho OR Liberia OR Libya | 5,178,516 |

|    |  |                                                                                                                                                                                                                                                                                                                                                                                                                                                                                                                                                                                                                                                                                                                                                                                                                                                                                                                                                                                                                                                                                                                                                                                         |     |
|----|--|-----------------------------------------------------------------------------------------------------------------------------------------------------------------------------------------------------------------------------------------------------------------------------------------------------------------------------------------------------------------------------------------------------------------------------------------------------------------------------------------------------------------------------------------------------------------------------------------------------------------------------------------------------------------------------------------------------------------------------------------------------------------------------------------------------------------------------------------------------------------------------------------------------------------------------------------------------------------------------------------------------------------------------------------------------------------------------------------------------------------------------------------------------------------------------------------|-----|
|    |  | <p>OR "Macedonia, FYR" OR Madagascar OR Malaysia OR Malawi OR Mali OR "Marshall Islands" OR Mauritania OR Mauritius OR Mexico OR "Micronesia, Fed. Sts." OR Moldova OR Mongolia OR Montenegro OR Morocco OR Mozambique OR Myanmar OR Namibia OR Nepal OR Nauru OR Nicaragua OR Niger OR Nigeria OR Pakistan OR "Papua New Guinea" OR Paraguay OR Peru OR Philippines OR Romania OR "Russian Federation" OR Rwanda OR Samoa OR " São Tomé and Príncipe" OR Senegal OR Serbia OR " Sierra Leone" OR Somalia OR Grenadines OR "Samoan Islands" OR " South Africa" OR "St. Lucia" OR "St. Vincent and the Grenadines" OR Sudan OR Suriname OR Swaziland OR " Syrian Arab Republic" OR "Sri Lanka" OR Tajikistan OR Tanzania OR Thailand OR Togo OR Tonga OR Tunisia OR Turkey OR Turkmenistan OR Tuvalu OR "Timor-Leste" OR Uganda OR Ukraine OR Uzbekistan OR Vanuatu OR Venezuela, RB OR Vietnam OR "West Bank and Gaza" OR "Yemen, Rep." OR Zambia OR Zimbabwe OR (developing countr*) OR (low-and middle income countr*) OR (LMIC*) OR (low income countr*) OR (middle income countr*) OR (lower middle income countr*) OR (upper middle income countr*))</p>                           |     |
| 43 |  | <p>18 AND 32 AND 41 AND 42<br/> ((((((((((((((((((((hypoxemia) OR hypoxaemia) OR anoxia) OR hypoxia) OR oximetry) OR oximeter) OR oximetry) OR oxymetry) OR oximeter) OR oxymetry) OR blood oxygen saturation) OR arterial oxygen saturation) OR blood gas monitoring) OR blood gas analysis) OR analysis blood gas) OR SpO2) OR SPO2)) AND<br/> ((((((((((((((((((((pneumonia) OR severe pneumonia) OR severe disease) OR very severe disease) OR bronchiolitis) OR acute respiratory infection) OR ARI) OR acute respiratory infections) OR acute respiratory tract infection) OR arti) OR acute respiratory tract infections) OR respiratory illness*) OR respiratory illnesses*)) AND (((((((Child*) OR Children*) OR Infant*) OR Infants*) OR Pediatric*) OR Pediatrics*) OR Paediatric*) OR Paediatrics*)) AND ((albania OR algeria OR angola OR american samoa OR armenia OR azerbaijan OR bangladesh OR benin OR belarus OR belize OR bhutan OR bolivia OR "Bosnia and Herzegovina" OR botswana OR brazil OR bulgaria OR "Burkina Faso" OR burundi OR cambodia OR cameroon OR "Cape Verde" OR "Central African Republic" OR chad OR china OR colombia OR comoros OR "Congo,</p> | 907 |

|  |  |                                                                                                                                                                                                                                                                                                                                                                                                                                                                                                                                                                                                                                                                                                                                                                                                                                                                                                                                                                                                                                                                                                                                                                                                                                                                                                                                                                                                                                                                                                                                                                                                                                                                                                                                                                 |  |
|--|--|-----------------------------------------------------------------------------------------------------------------------------------------------------------------------------------------------------------------------------------------------------------------------------------------------------------------------------------------------------------------------------------------------------------------------------------------------------------------------------------------------------------------------------------------------------------------------------------------------------------------------------------------------------------------------------------------------------------------------------------------------------------------------------------------------------------------------------------------------------------------------------------------------------------------------------------------------------------------------------------------------------------------------------------------------------------------------------------------------------------------------------------------------------------------------------------------------------------------------------------------------------------------------------------------------------------------------------------------------------------------------------------------------------------------------------------------------------------------------------------------------------------------------------------------------------------------------------------------------------------------------------------------------------------------------------------------------------------------------------------------------------------------|--|
|  |  | <p>Dem. Rep" OR "Congo, Rep." OR "Costa Rica" OR "Cote d'Ivoire" OR cuba OR djibouti OR dominica OR "Dominican Republic" OR "Ecuador" OR "Egypt, Arab Rep." OR "El Salvador" OR eritrea OR ethiopia OR ethiopia OR fiji OR gabon OR "Gambia, The" OR georgia OR ghana OR grenada OR guatemala OR guinea OR guyana OR "Guinea-Bissau " OR haiti OR honduras OR india OR maldives OR indonesia OR "Iran, Islamic Rep." OR iraq OR jamaica OR jordan OR kazakhstan OR kenya OR kiribati OR "Korea, Dem. People's Rep." OR kosovo OR "Kyrgyz Republic" OR "Lao PDR" OR lebanon OR lesotho OR liberia OR libya OR "Macedonia, FYR" OR madagascar OR malaysia OR malawi OR mali OR "Marshall Islands" OR mauritania OR mauritius OR mexico OR "Micronesia, Fed. Sts." OR moldova OR mongolia OR montenegro OR morocco OR mozambique OR myanmar OR namibia OR nepal OR nauru OR nicaragua OR niger OR nigeria OR pakistan OR "Papua New Guinea" OR paraguay OR peru OR philippines OR romania OR "Russian Federation" OR rwnda OR samoa OR "Sao Tome and Principe" OR senegal OR serbia OR "Sierra Leone" OR somalia OR grenadines OR "Samoan Islands" OR "South Africa" OR "St. Lucia" OR "St. Vincent and the Grenadines" OR sudan OR suriname OR swaziland OR "Syrian Arab Republic" OR "Sri Lanka" OR tajikistan OR tanzania OR thailand OR togo OR tonga OR tunisia OR turkey OR turkmenistan OR tuvalu OR "Timor-Leste" OR uganda OR ukraine OR uzbekistan OR vanuatu OR venezuela, rb OR vietnam OR "West Bank and Gaza" OR "Yemen, Rep." OR zambia OR zimbabwe OR (developing countr*) OR (low-and middle income countr*) OR (LMIC*) OR (low income countr*) OR (middle income countr*) OR (lower middle income countr*) OR (upper middle income countr*))</p> |  |
|--|--|-----------------------------------------------------------------------------------------------------------------------------------------------------------------------------------------------------------------------------------------------------------------------------------------------------------------------------------------------------------------------------------------------------------------------------------------------------------------------------------------------------------------------------------------------------------------------------------------------------------------------------------------------------------------------------------------------------------------------------------------------------------------------------------------------------------------------------------------------------------------------------------------------------------------------------------------------------------------------------------------------------------------------------------------------------------------------------------------------------------------------------------------------------------------------------------------------------------------------------------------------------------------------------------------------------------------------------------------------------------------------------------------------------------------------------------------------------------------------------------------------------------------------------------------------------------------------------------------------------------------------------------------------------------------------------------------------------------------------------------------------------------------|--|

Final search output: 907

## Search Summary 9

Name of the database

Global Index Medicus (WHO)

- African Index Medicus (AFRO)
- literature of Latin America and the Caribbean (AMRO/Pan American Health Organizaton)
- The Index Medicus for the Estern Mediterranean Region (IMEMR/ EMRO)
- The Index Medicus for South- East Asia Region (IMSEAR/ SEARO)
- Western Pacific Region Index Medicus (WPRIM/ WPRO)

Date of search

30 September, 2021

Timeline

Not applicable

Search Language

| Line # | Theme      | Search Language                                                                                                                                                                                  | Output # |
|--------|------------|--------------------------------------------------------------------------------------------------------------------------------------------------------------------------------------------------|----------|
| 1      | Hypoxaemia | tw:(hypoxemia) AND (instance:"ghl")                                                                                                                                                              | 3.987    |
| 2      |            | tw:(hypoxaemia) AND (instance:"ghl")                                                                                                                                                             | 101      |
| 3      |            | tw:(anoxia) AND (instance:"ghl")                                                                                                                                                                 | 4,848    |
| 4      |            | tw:(hypoxia) AND (instance:"ghl")                                                                                                                                                                | 9.655    |
| 5      |            | tw:(oximetry) AND (instance:"ghl")                                                                                                                                                               | 1.034    |
| 6      |            | tw:(oximeter) AND (instance:"ghl")                                                                                                                                                               | 297      |
| 7      |            | oximetre                                                                                                                                                                                         | 0        |
| 8      |            | tw:(oxymetry) AND (instance:"ghl")                                                                                                                                                               | 83       |
| 9      |            | tw:(oxymeter) AND (instance:"ghl")                                                                                                                                                               | 37       |
| 10     |            | oxymetre                                                                                                                                                                                         | 0        |
| 11     |            | tw:(blood oxygen saturation ) AND (instance:"ghl")                                                                                                                                               | 2.152    |
| 12     |            | tw:(arterial oxygen saturation) AND (instance:"ghl")                                                                                                                                             | 1.616    |
| 13     |            | tw:(blood gas monitoring ) AND (instance:"ghl")                                                                                                                                                  | 620      |
| 14     |            | tw:(blood gas analysis ) AND (instance:"ghl")                                                                                                                                                    | 3.715    |
| 15     |            | tw:(analysis blood gas ) AND (instance:"ghl")                                                                                                                                                    | 3.715    |
| 16     |            | tw:(spo2) AND (instance:"ghl")                                                                                                                                                                   | 1.095    |
| 17     |            | tw:(spo2) AND (instance:"ghl")                                                                                                                                                                   | 1.095    |
| 18     |            | 1 or 2 or 3 or 4 or 5 or 6 or 7 or 8 or 9 or 10 or 11 or 12 or 13 or 14 or 15 or 16 or 17<br>tw:(hypoxemia OR hypoxaemia OR anoxia OR hypoxia OR oximetry OR oximeter OR oximetre OR oxymetry OR | 18,269   |

|    |                                     |                                                                                                                                                                                                                                                                                                                                                                                                                               |         |
|----|-------------------------------------|-------------------------------------------------------------------------------------------------------------------------------------------------------------------------------------------------------------------------------------------------------------------------------------------------------------------------------------------------------------------------------------------------------------------------------|---------|
|    |                                     | oxymeter OR oxymetre OR (blood oxygen saturation) OR (arterial oxygen saturation) OR (blood gas monitoring) OR (blood gas analysis) OR (analysis blood gas) OR spo2 OR spo2) AND (instance:"ghl")                                                                                                                                                                                                                             |         |
| 19 | Pneumonia                           | tw:(pneumonia) AND (instance:"ghl")                                                                                                                                                                                                                                                                                                                                                                                           | 22.597  |
| 20 |                                     | tw:(severe pneumonia) AND (instance:"ghl")                                                                                                                                                                                                                                                                                                                                                                                    | 4.682   |
| 21 |                                     | tw:(severe disease ) AND (instance:"ghl")                                                                                                                                                                                                                                                                                                                                                                                     | 41.648  |
| 22 |                                     | tw:(very severe disease ) AND (instance:"ghl")                                                                                                                                                                                                                                                                                                                                                                                | 2.533   |
| 23 |                                     | tw:(bronchiolitis) AND (instance:"ghl")                                                                                                                                                                                                                                                                                                                                                                                       | 1.540   |
| 24 |                                     | tw:(acute respiratory infection) AND (instance:"ghl")                                                                                                                                                                                                                                                                                                                                                                         | 6.270   |
| 25 |                                     | tw:(ari) AND (instance:"ghl")                                                                                                                                                                                                                                                                                                                                                                                                 | 703     |
| 26 |                                     | tw:(acute respiratory infections) AND (instance:"ghl")                                                                                                                                                                                                                                                                                                                                                                        | 5.168   |
| 27 |                                     | tw:(acute respiratory tract infection) AND (instance:"ghl")                                                                                                                                                                                                                                                                                                                                                                   | 2.266   |
| 28 |                                     | tw:(arti) AND (instance:"ghl")                                                                                                                                                                                                                                                                                                                                                                                                | 140     |
| 29 |                                     | tw:(acute respiratory tract infections) AND (instance:"ghl")                                                                                                                                                                                                                                                                                                                                                                  | 2.084   |
| 30 |                                     | tw:(respiratory illness*) AND (instance:"ghl")                                                                                                                                                                                                                                                                                                                                                                                | 3.477   |
| 31 |                                     | tw:(respiratory illnesses*) AND (instance:"ghl")                                                                                                                                                                                                                                                                                                                                                                              | 1.398   |
| 32 |                                     | 19 or 20 or 21 or 22 or 23 or 24 or 25 or 26 or 27 or 28 or 29 or 30 or 31<br>tw:(pneumonia OR (severe pneumonia) OR (severe disease) OR (very severe disease) OR bronchiolitis OR (acute respiratory infection) OR ari OR (acute respiratory infections) OR (acute respiratory tract infection) OR arti OR (acute respiratory tract infections) OR (respiratory illness*) OR (respiratory illnesses*) ) AND (instance:"ghl") | 68.111  |
| 33 | children<br>under 5<br>years of age | tw:(child* ) AND (instance:"ghl")                                                                                                                                                                                                                                                                                                                                                                                             | 253.850 |
| 34 |                                     | tw:(children*) AND (instance:"ghl")                                                                                                                                                                                                                                                                                                                                                                                           | 212.838 |
| 35 |                                     | tw:(infant*) AND (instance:"ghl")                                                                                                                                                                                                                                                                                                                                                                                             | 169.620 |
| 36 |                                     | tw:(infants*) AND (instance:"ghl")                                                                                                                                                                                                                                                                                                                                                                                            | 92.959  |
| 37 |                                     | tw:(pediatric*) AND (instance:"ghl")                                                                                                                                                                                                                                                                                                                                                                                          | 56.773  |
| 38 |                                     | tw:(pediatrics* ) AND (instance:"ghl")                                                                                                                                                                                                                                                                                                                                                                                        | 13.240  |
| 39 |                                     | tw:(paediatric*) AND (instance:"ghl")                                                                                                                                                                                                                                                                                                                                                                                         | 4.003   |
| 40 |                                     | tw:(paediatrics*) AND (instance:"ghl")                                                                                                                                                                                                                                                                                                                                                                                        | 669     |
| 41 |                                     | 33 or 34 or 35 or 36 or 37 or 38 or 39 or 40<br>tw:(child* OR children* OR infant* OR infants* OR pediatric* OR pediatrics* OR paediatric* OR paediatrics*) AND (instance:"ghl")                                                                                                                                                                                                                                              | 327.748 |
| 42 |                                     | 18 AND 32 AND 41                                                                                                                                                                                                                                                                                                                                                                                                              | 376     |

### Search Summary 10

Name of the database

IndMed (Advanced)

Date of search

29 January 2019

Timeline

Not applicable

Search Language

| Line # | Theme                         | Search Language                                                                                                                                                                                                                                                                                  | Output # |
|--------|-------------------------------|--------------------------------------------------------------------------------------------------------------------------------------------------------------------------------------------------------------------------------------------------------------------------------------------------|----------|
| 1      | Hypoxaemia                    | hypoxemia OR hypoxaemia OR anoxia OR hypoxia OR oximetry OR oximeter OR oximetre OR oxymetry OR oxymeter OR oxymetre OR blood oxygen saturation OR arterial oxygen saturation OR blood gas monitoring OR blood gas analysis OR analysis blood gas OR SpO2 OR SPO2                                | 685      |
| 2      | Pneumonia                     | pneumonia OR severe pneumonia OR severe disease OR very severe disease OR bronchiolitis OR acute respiratory infection OR ARI OR acute respiratory infections OR acute respiratory tract infection OR ARTI OR acute respiratory tract infections OR respiratory illness OR respiratory illnesses | 3081     |
| 3      | children under 5 years of age | child OR children OR infant OR infants OR pediatric OR pediatrics OR paediatric OR paediatrics                                                                                                                                                                                                   | 15800    |
| 4      |                               | 1 AND 2 AND 3                                                                                                                                                                                                                                                                                    | 33       |

Final search output :33



### Search Summary 11

Name of the database

Web of Science (Advanced)

Date of search

29 September, 2021

Timeline

Not applicable

Search Language

| Line # | Theme      | Search Language                                                                                            | Output # |
|--------|------------|------------------------------------------------------------------------------------------------------------|----------|
| 1      | Hypoxaemia | TS=( Hypoxemia)                                                                                            | 19,563   |
| 2      |            | TS=(hypoxaemia)                                                                                            | 2,790    |
| 3      |            | TS=(anoxia)                                                                                                | 14,241   |
| 4      |            | TS=(hypoxia)                                                                                               | 164,284  |
| 5      |            | TS=(oximetry)                                                                                              | 14,422   |
| 6      |            | TS=(oximeter)                                                                                              | 4,006    |
| 7      |            | TS=( oximetre)                                                                                             | 2        |
| 8      |            | TS=( oxymetry)                                                                                             | 502      |
| 9      |            | TS=(oxymeter)                                                                                              | 155      |
| 10     |            | TS=(oxymetre)                                                                                              | 0        |
| 11     |            | TS=(blood oxygen saturation)                                                                               | 16,069   |
| 12     |            | TS=(arterial oxygen saturation)                                                                            | 10,510   |
| 13     |            | TS=(blood gas monitoring)                                                                                  | 6,075    |
| 14     |            | TS=(blood gas analysis)                                                                                    | 15,105   |
| 15     |            | TS=(analysis blood gas)                                                                                    | 15,105   |
| 16     |            | TS=(SpO2)                                                                                                  | 1,910    |
| 17     |            | TS=(SPO2)                                                                                                  | 1,910    |
| 18     |            | #17 OR #16 OR #15 OR #14 OR #13 OR #12 OR #11 OR #10 OR #9 OR #8 OR #7 OR #6 OR #5 OR #4 OR #3 OR #2 OR #1 | 233,989  |
| 19     | Pneumonia  | TS= (Pneumonia)                                                                                            | 144,419  |
| 20     |            | TS=(severe pneumonia)                                                                                      | 25,168   |
| 21     |            | TS=(severe disease)                                                                                        | 336,104  |
| 22     |            | TS=(very severe disease)                                                                                   | 21,394   |
| 23     |            | TS=(bronchiolitis)                                                                                         | 16,072   |
| 24     |            | TS=(acute respiratory infection)                                                                           | 42,365   |
| 25     |            | TS=(acute respiratory infections)                                                                          | 42,365   |
| 26     |            | TS=(ARI)                                                                                                   | 4,984    |

|    |                               |                                                                                                                                                                                                                                                                                                                                                                                                                                                                                                                                                                                                                                                                                                                                                                                                                                                                                                                                                                                                                                                                                                                                                                                                                                                                                                                                                                                                                                                                         |            |
|----|-------------------------------|-------------------------------------------------------------------------------------------------------------------------------------------------------------------------------------------------------------------------------------------------------------------------------------------------------------------------------------------------------------------------------------------------------------------------------------------------------------------------------------------------------------------------------------------------------------------------------------------------------------------------------------------------------------------------------------------------------------------------------------------------------------------------------------------------------------------------------------------------------------------------------------------------------------------------------------------------------------------------------------------------------------------------------------------------------------------------------------------------------------------------------------------------------------------------------------------------------------------------------------------------------------------------------------------------------------------------------------------------------------------------------------------------------------------------------------------------------------------------|------------|
| 27 |                               | TS=(acute respiratory tract infection)                                                                                                                                                                                                                                                                                                                                                                                                                                                                                                                                                                                                                                                                                                                                                                                                                                                                                                                                                                                                                                                                                                                                                                                                                                                                                                                                                                                                                                  | 11,598     |
| 28 |                               | TS=(acute respiratory tract infections)                                                                                                                                                                                                                                                                                                                                                                                                                                                                                                                                                                                                                                                                                                                                                                                                                                                                                                                                                                                                                                                                                                                                                                                                                                                                                                                                                                                                                                 | 11,598     |
| 29 |                               | TS=(ARTI)                                                                                                                                                                                                                                                                                                                                                                                                                                                                                                                                                                                                                                                                                                                                                                                                                                                                                                                                                                                                                                                                                                                                                                                                                                                                                                                                                                                                                                                               | 705        |
| 30 |                               | TS=(respiratory illness*)                                                                                                                                                                                                                                                                                                                                                                                                                                                                                                                                                                                                                                                                                                                                                                                                                                                                                                                                                                                                                                                                                                                                                                                                                                                                                                                                                                                                                                               | 25,705     |
| 31 |                               | TS=( respiratory illnesses*)                                                                                                                                                                                                                                                                                                                                                                                                                                                                                                                                                                                                                                                                                                                                                                                                                                                                                                                                                                                                                                                                                                                                                                                                                                                                                                                                                                                                                                            | 5,564      |
| 32 |                               | #31 OR #30 OR #29 OR #28 OR #27 OR #26 OR #25 OR #24 OR #23 OR #22 OR #21 OR #20 OR #19                                                                                                                                                                                                                                                                                                                                                                                                                                                                                                                                                                                                                                                                                                                                                                                                                                                                                                                                                                                                                                                                                                                                                                                                                                                                                                                                                                                 | 517,330    |
| 33 | Children under 5 years of age | TS=(child*)                                                                                                                                                                                                                                                                                                                                                                                                                                                                                                                                                                                                                                                                                                                                                                                                                                                                                                                                                                                                                                                                                                                                                                                                                                                                                                                                                                                                                                                             | 2,013,398  |
| 34 |                               | TS=(children*)                                                                                                                                                                                                                                                                                                                                                                                                                                                                                                                                                                                                                                                                                                                                                                                                                                                                                                                                                                                                                                                                                                                                                                                                                                                                                                                                                                                                                                                          | 1,585,570  |
| 35 |                               | TS=(infant*)                                                                                                                                                                                                                                                                                                                                                                                                                                                                                                                                                                                                                                                                                                                                                                                                                                                                                                                                                                                                                                                                                                                                                                                                                                                                                                                                                                                                                                                            | 474,019    |
| 36 |                               | TS=(infants*s)                                                                                                                                                                                                                                                                                                                                                                                                                                                                                                                                                                                                                                                                                                                                                                                                                                                                                                                                                                                                                                                                                                                                                                                                                                                                                                                                                                                                                                                          | 7          |
| 37 |                               | TS=( pediatric*)                                                                                                                                                                                                                                                                                                                                                                                                                                                                                                                                                                                                                                                                                                                                                                                                                                                                                                                                                                                                                                                                                                                                                                                                                                                                                                                                                                                                                                                        | 379,321    |
| 38 |                               | TS=(pediatrics*)                                                                                                                                                                                                                                                                                                                                                                                                                                                                                                                                                                                                                                                                                                                                                                                                                                                                                                                                                                                                                                                                                                                                                                                                                                                                                                                                                                                                                                                        | 44,193     |
| 39 |                               | TS=(paediatric*)                                                                                                                                                                                                                                                                                                                                                                                                                                                                                                                                                                                                                                                                                                                                                                                                                                                                                                                                                                                                                                                                                                                                                                                                                                                                                                                                                                                                                                                        | 75,210     |
| 40 |                               | TS=(paediatrics*)                                                                                                                                                                                                                                                                                                                                                                                                                                                                                                                                                                                                                                                                                                                                                                                                                                                                                                                                                                                                                                                                                                                                                                                                                                                                                                                                                                                                                                                       | 8,380      |
| 41 |                               | #40 OR #39 OR #38 OR #37 OR #36 OR #35 OR #34 OR #33                                                                                                                                                                                                                                                                                                                                                                                                                                                                                                                                                                                                                                                                                                                                                                                                                                                                                                                                                                                                                                                                                                                                                                                                                                                                                                                                                                                                                    | 2,472,694  |
| 42 | Low and Middle Income Country | CU=(Afghanistan) OR CU=(Albania) OR CU=(Algeria) OR CU=(Angola) OR CU=(American Samoa) OR CU=(Armenia) OR CU=(Azerbaijan) OR CU=(Bangladesh) OR CU=(Benin) OR CU=(Belarus) OR CU=(Belize) OR CU=(Bhutan) OR CU=(Bolivia) OR CU=(Bosnia and Herzegovina) OR CU=(Botswana) OR CU=(Brazil) OR CU=(Bulgaria) OR CU=( "Burkina Faso") OR CU=(Burundi) OR CU=(Cambodia) OR CU=(Cameroon) OR CU=( "Cape Verde") OR CU=(Central African Republic) OR CU=(Chad) OR CU=(China) OR CU=(Colombia) OR CU=(Comoros) OR CU=(Congo, Dem. Rep) OR CU=(Congo, Rep.) OR CU=( "Costa Rica") OR CU=( "Cote d'Ivoire") OR CU=(Cuba) OR CU=(Djibouti) OR CU=(Dominica) OR CU=(Dominican Republic) OR CU=(Ecuador) OR CU=(Egypt) OR CU=( "El Salvador") OR CU=(Eritrea) OR CU=(Ethiopia) OR CU=(Ethiopia) OR CU=(Fiji) OR CU=(Gabon) OR CU=(Gambia) OR CU=(Georgia) OR CU=(Ghana) OR CU=(Grenada) OR CU=(Guatemala) OR CU=(Guinea) OR CU=(Guyana) OR CU=( "Guinea-Bissau") OR CU=(Haiti) OR CU=(Honduras) OR CU=(India) OR CU=(Maldives) OR CU=(Indonesia) OR CU=(Iran) OR CU=(Iraq) OR CU=(Jamaica) OR CU=(Jordan) OR CU=(Kazakhstan) OR CU=(Kenya) OR CU=(Kiribati) OR CU=(Korea) OR CU=(Kosovo) OR CU=(Kyrgyz Republic) OR CU=(Lao PDR) OR CU=(Lebanon) OR CU=(Lesotho) OR CU=(Liberia) OR CU=(Libya) OR CU=(Macedonia, FYR) OR CU=(Madagascar) OR CU=(Malaysia) OR CU=(Malawi) OR CU=(Mali) OR TS=(Marshall Islands) OR CU=(Mauritania) OR CU=(Mauritius) OR CU=(Mexico) OR CU=(Micronesia) | 17,062,517 |

|    |  |                                                                                                                                                                                                                                                                                                                                                                                                                                                                                                                                                                                                                                                                                                                                                                                                                                                                                                                                                                                                                                                                                                                                                                                                       |     |
|----|--|-------------------------------------------------------------------------------------------------------------------------------------------------------------------------------------------------------------------------------------------------------------------------------------------------------------------------------------------------------------------------------------------------------------------------------------------------------------------------------------------------------------------------------------------------------------------------------------------------------------------------------------------------------------------------------------------------------------------------------------------------------------------------------------------------------------------------------------------------------------------------------------------------------------------------------------------------------------------------------------------------------------------------------------------------------------------------------------------------------------------------------------------------------------------------------------------------------|-----|
|    |  | OR CU=(Moldova) OR CU=(Mongolia) OR CU=(Montenegro) OR CU=(Morocco) OR CU=(Mozambique) OR CU=(Myanmar) OR CU=(Namibia) OR CU=(Nepal) OR CU=(Nauru) OR CU=(Nicaragua) OR CU=(Niger) OR CU=(Nigeria) OR CU=(Pakistan) OR CU=(Papua New Guinea) OR CU=(Paraguay) OR CU=(Peru) OR CU=(Philippines) OR CU=(Romania) OR CU=(Russia) OR CU=(Rwanda) OR CU=(Samoa) OR CU=(Senegal) OR CU=(Serbia) OR CU=("Sierra Leone") OR CU=(Somalia) OR CU=(Grenadines) OR CU=(Samoan Islands) OR CU=("South Africa") OR CU=(St. Lucia) OR CU=(St. Vincent and the Grenadines) OR CU=(Sudan) OR CU=(Suriname) OR CU=(Swaziland) OR CU=(Syrian) OR CU=("Sri Lanka") OR CU=(Tajikistan) OR CU=(Tanzania) OR CU=(Thailand) OR CU=(Togo) OR CU=(Tonga) OR CU=(Tunisia) OR CU=(Turkey) OR CU=(Turkmenistan) OR CU=(Tuvalu) OR CU=(Timor-Leste) OR CU=(Uganda) OR CU=(Ukraine) OR CU=(Uzbekistan) OR CU=(Vanuatu) OR CU=(Venezuela) OR CU=(Vietnam) OR CU=(Gaza*) OR CU=(Yemen) OR CU=(Zambia) OR CU=(Zimbabwe) OR CU=(developing countr*) OR CU=(low-and middle income countr*) OR CU=(LMIC*) OR CU=(low income countr*) OR CU=(middle income countr*) OR CU=(lower middle income countr*) OR CU=(upper middle income countr*) |     |
| 43 |  | #42 AND #41 AND #32 AND #18                                                                                                                                                                                                                                                                                                                                                                                                                                                                                                                                                                                                                                                                                                                                                                                                                                                                                                                                                                                                                                                                                                                                                                           | 628 |

Final search output : 628

**Supplementary table 2: List of low- and middle-income countries**

| Serial No | County         |
|-----------|----------------|
| 1.        | Afghanistan    |
| 2.        | Albania        |
| 3.        | Albania        |
| 4.        | American Samoa |
| 5.        | Angola         |
| 6.        | Armenia        |
| 7.        | Azerbaijan     |
| 8.        | Bangladesh     |
| 9.        | Belarus        |
| 10.       | Belize         |
| 11.       | Benin          |
| 12.       | Bhutan         |

|     |                                                              |
|-----|--------------------------------------------------------------|
| 13. | Bolivia                                                      |
| 14. | Bosnia and Herzegovina                                       |
| 15. | Botswana                                                     |
| 16. | Brazil                                                       |
| 17. | Bulgaria                                                     |
| 18. | Burkina Faso                                                 |
| 19. | Burundi                                                      |
| 20. | Cabo Verde                                                   |
| 21. | Cambodia                                                     |
| 22. | Cameroon                                                     |
| 23. | Central African Republic                                     |
| 24. | Chad                                                         |
| 25. | China                                                        |
| 26. | Colombia                                                     |
| 27. | Comoros                                                      |
| 28. | Democratic Republic of Congo OR DR Congo OR DRC OR the Congo |
| 29. | Congo, Rep.                                                  |
| 30. | Costa Rica                                                   |
| 31. | Côte d'Ivoire OR Ivory Coast                                 |
| 32. | Cuba                                                         |
| 33. | Djibouti                                                     |
| 34. | Dominica                                                     |
| 35. | Dominican Republic                                           |
| 36. | Ecuador                                                      |
| 37. | Egypt, Arab Rep.                                             |
| 38. | El Salvador                                                  |
| 39. | Equatorial Guinea                                            |
| 40. | Eritrea                                                      |
| 41. | Ethiopia                                                     |
| 42. | Fiji                                                         |
| 43. | Gabon                                                        |
| 44. | The Gambia                                                   |
| 45. | Georgia                                                      |
| 46. | Ghana                                                        |
| 47. | Grenada                                                      |
| 48. | Guatemala                                                    |
| 49. | Guinea                                                       |
| 50. | Guinea-Bissau or Guinea Bissau                               |
| 51. | Guyana                                                       |

|     |                           |
|-----|---------------------------|
| 52. | Haiti                     |
| 53. | Honduras                  |
| 54. | India                     |
| 55. | Indonesia                 |
| 56. | Iran, Islamic Rep.        |
| 57. | Iraq                      |
| 58. | Jamaica                   |
| 59. | Jordan                    |
| 60. | Kazakhstan                |
| 61. | Kenya                     |
| 62. | Kiribati                  |
| 63. | Korea, Dem. People's Rep. |
| 64. | Kosovo                    |
| 65. | Kyrgyz Republic           |
| 66. | Lao PDR                   |
| 67. | Lebanon                   |
| 68. | Lesotho                   |
| 69. | Liberia                   |
| 70. | Libya                     |
| 71. | Macedonia, FYR            |
| 72. | Madagascar                |
| 73. | Malawi                    |
| 74. | Malaysia                  |
| 75. | Maldives                  |
| 76. | Mali                      |
| 77. | Marshall Islands          |
| 78. | Mauritania                |
| 79. | Mauritius                 |
| 80. | Mexico                    |
| 81. | Micronesia, Fed. Sts.     |
| 82. | Moldova                   |
| 83. | Mongolia                  |
| 84. | Montenegro                |
| 85. | Morocco                   |
| 86. | Mozambique                |
| 87. | Myanmar                   |
| 88. | Namibia                   |
| 89. | Nauru                     |
| 90. | Nepal                     |

|      |                                                              |
|------|--------------------------------------------------------------|
| 91.  | Nicaragua                                                    |
| 92.  | Niger                                                        |
| 93.  | Nigeria                                                      |
| 94.  | Pakistan                                                     |
| 95.  | Papua New Guinea                                             |
| 96.  | Paraguay                                                     |
| 97.  | Peru                                                         |
| 98.  | Philippines                                                  |
| 99.  | Romania                                                      |
| 100. | Russian Federation                                           |
| 101. | Rwanda                                                       |
| 102. | Samoa                                                        |
| 103. | São Tomé and Príncipe OR Timor OR Timor-Liste OR Timor Liste |
| 104. | Senegal                                                      |
| 105. | Serbia                                                       |
| 106. | Sierra Leone                                                 |
| 107. | Solomon Islands                                              |
| 108. | Somalia                                                      |
| 109. | South Africa                                                 |
| 110. | South Sudan                                                  |
| 111. | Sri Lanka                                                    |
| 112. | Saint Lucia                                                  |
| 113. | Vincent and the Grenadines                                   |
| 114. | Sudan                                                        |
| 115. | Suriname                                                     |
| 116. | Swaziland                                                    |
| 117. | Syrian Arab Republic                                         |
| 118. | Tajikistan                                                   |
| 119. | Tanzania                                                     |
| 120. | Thailand                                                     |
| 121. | Timor-Leste                                                  |
| 122. | Togo                                                         |
| 123. | Tonga                                                        |
| 124. | Tunisia                                                      |
| 125. | Turkey                                                       |
| 126. | Turkmenistan                                                 |
| 127. | Tuvalu                                                       |
| 128. | Uganda                                                       |

|      |                    |
|------|--------------------|
| 129. | Ukraine            |
| 130. | Uzbekistan         |
| 131. | Vanuatu            |
| 132. | Venezuela, RB      |
| 133. | Vietnam            |
| 134. | West Bank and Gaza |
| 135. | Yemen, Rep.        |
| 136. | Zambia             |
| 137. | Zimbabwe           |

**Supplementary table 3: Structured screening form for abstracts**

|                                       |                                             |                                                                 |    |                       |
|---------------------------------------|---------------------------------------------|-----------------------------------------------------------------|----|-----------------------|
| Reviewer Code                         |                                             |                                                                 |    |                       |
| Abstract ID                           |                                             |                                                                 |    |                       |
| Name of the journal                   |                                             |                                                                 |    |                       |
| Title                                 |                                             |                                                                 |    |                       |
| First Author                          |                                             |                                                                 |    |                       |
| Last Author                           |                                             |                                                                 |    |                       |
| Language                              | 1.English<br>2. French<br>3.Chinese         | 4.Spanish<br>5. German<br>6. -----                              |    |                       |
| Study design                          | 1. Cross sectional study<br>2. Cohort study | 3. Non -randomized control trial<br>4. Randomized control trial |    |                       |
| Inclusion Criteria                    |                                             |                                                                 |    |                       |
| Population                            | Children under the age of five years        | Yes                                                             | No | N/A                   |
|                                       | Classified as pneumonia                     | Yes                                                             | No | N/A                   |
| Outcome                               | SpO2 status measured with pulse oximetry    | Yes                                                             | No | N/A                   |
| Context                               | Low and middle income countries             | Yes                                                             | No | N/A                   |
| Year of publication                   | Any study published by Dec 2018             | Yes                                                             | No | N/A                   |
| Exclusion Criteria                    |                                             |                                                                 |    |                       |
| Sample size                           | Less than hundred                           | Yes                                                             | No | N/A                   |
| Use of pulse oximeter                 | To identify a particular illness            | Yes                                                             | No | N/A                   |
| Screening result                      |                                             |                                                                 |    |                       |
|                                       | Included for data extraction                | Yes                                                             | No | Need full text review |
| If not included, reason for exclusion |                                             |                                                                 |    |                       |
| Additional comments (if any)          |                                             |                                                                 |    |                       |



**Supplementary table 4: Extraction of data from selected articles after screening**

| Sl # | Item                             | Option                      |     |    |
|------|----------------------------------|-----------------------------|-----|----|
| 1    | Study ID                         |                             |     |    |
| 2    | Study Title                      |                             |     |    |
| 3    | First Author Last Name           |                             |     |    |
| 4    | Last Author Last Name            |                             |     |    |
| 5    | Year of Publication              |                             |     |    |
| 6    | Name of the Journal              |                             |     |    |
| 7    | Type of Study                    | Cross Sectional             |     |    |
|      |                                  | Case Control                |     |    |
|      |                                  | Cohort                      |     |    |
|      |                                  | Individual RTC              |     |    |
|      |                                  | Cluster RCT                 |     |    |
|      |                                  | Quasi-Experimental          |     |    |
| 8    | Study Settings-Region            | Asia                        |     |    |
|      |                                  | Europe                      |     |    |
|      |                                  | Africa                      |     |    |
|      |                                  | South America               |     |    |
|      |                                  | North America               |     |    |
| 9    | Study Settings-Clinical          | Referral Hospital           |     |    |
|      |                                  | Non-Referral Health Centres |     |    |
|      |                                  | Community                   |     |    |
| 10   | Age group                        | 2-11 months                 | Yes | No |
|      |                                  | 11-59 months                | Yes | No |
|      |                                  | >59 Months                  | Yes | No |
| 11   | Specific Classification Reported |                             | Yes | No |
| 12   | Type of Classification Reported  | Pneumonia                   | Yes | No |
|      |                                  | Severe Pneumonia            | Yes | No |
|      |                                  | ARI                         | Yes | No |
|      |                                  | Others, specify             | Yes | No |
| 13   | PO use Reported                  |                             | Yes | No |
| 14   | Type of PO Used, specify         |                             |     |    |
| 15   | Hypoxaemia Reported              |                             | Yes | No |
| 16   | Prevalence of Hypoxaemia in %    | Overall                     |     |    |
|      |                                  | 2-11 months                 |     |    |
|      |                                  | 11-59 months                |     |    |
|      |                                  | >59 Months                  |     |    |
|      |                                  | Pneumonia                   |     |    |
|      |                                  | Severe Pneumonia            |     |    |

|               |                                                           |                             |     |    |
|---------------|-----------------------------------------------------------|-----------------------------|-----|----|
|               |                                                           | ARI                         |     |    |
|               |                                                           | Others, specify             |     |    |
|               |                                                           | Referral Hospital           |     |    |
|               |                                                           | Non-Referral Health Centres |     |    |
|               |                                                           | Community                   |     |    |
|               |                                                           | Asia                        |     |    |
|               |                                                           | Europe                      |     |    |
|               |                                                           | Africa                      |     |    |
|               |                                                           | South America               |     |    |
|               |                                                           | North America               |     |    |
| 17            | Specific SpO2 Measurement Available                       |                             | Yes | No |
| 18            | SpO2 Status in %                                          | Overall                     |     |    |
|               |                                                           | 2-11 months                 |     |    |
|               |                                                           | 11-59 months                |     |    |
|               |                                                           | >59 Months                  |     |    |
|               |                                                           | Pneumonia                   |     |    |
|               |                                                           | Severe Pneumonia            |     |    |
|               |                                                           | ARI                         |     |    |
|               |                                                           | Others Classification       |     |    |
|               |                                                           | Referral Hospital           |     |    |
|               |                                                           | Non-Referral Health Centres |     |    |
|               |                                                           | Community                   |     |    |
|               |                                                           | Asia                        |     |    |
|               |                                                           | Europe                      |     |    |
|               |                                                           | Africa                      |     |    |
| South America |                                                           |                             |     |    |
| North America |                                                           |                             |     |    |
| 19            | Type of Health Care Worker measuring SpO2 reported        |                             | Yes | No |
| 20            | Type of Health Care Worker                                | Doctors                     | Yes | No |
|               |                                                           | Nurses                      | Yes | No |
|               |                                                           | Paramedics                  | Yes | No |
|               |                                                           | Community Health Worker     | Yes | No |
| 21            | Oxygen Given for Hypoxaemia Reported                      |                             | Yes | No |
| 22            | Type of Oxygen Given                                      | High Flow                   |     |    |
|               |                                                           | Low Flow                    |     |    |
| 23            | Other Intervention Given for Hypoxaemia Reported          |                             | Yes | No |
| 24            | Other Intervention Given for Hypoxaemia Reported, specify |                             |     |    |

| 25            | Case Fatality Rate Reported among Hypoxaemia Cases (without intervention) Reported |                             | Yes | No |
|---------------|------------------------------------------------------------------------------------|-----------------------------|-----|----|
| 26            | Case Fatality Rate (death) among Hypoxaemia Cases (without intervention) in %      | Overall                     |     |    |
|               |                                                                                    | 2-11 months                 |     |    |
|               |                                                                                    | 11-59 months                |     |    |
|               |                                                                                    | >59 Months                  |     |    |
|               |                                                                                    | Pneumonia                   |     |    |
|               |                                                                                    | Severe Pneumonia            |     |    |
|               |                                                                                    | ARI                         |     |    |
|               |                                                                                    | Others, specify             |     |    |
|               |                                                                                    | Referral Hospital           |     |    |
|               |                                                                                    | Non-Referral Health Centres |     |    |
|               |                                                                                    | Community                   |     |    |
|               |                                                                                    | Asia                        |     |    |
|               |                                                                                    | Europe                      |     |    |
|               |                                                                                    | Africa                      |     |    |
| South America |                                                                                    |                             |     |    |
| North America |                                                                                    |                             |     |    |
| 27            | Other Outcome Reported                                                             |                             | Yes | No |
| 28            | Other Outcome Reported, please specific                                            |                             |     |    |

**Supplementary Table 5: Overview of the studies reporting the prevalence of hypoxaemia among WHO-classified pneumonia**

| Author              | Year | Journal                                  | Region             | Country                                                                    | Altitude | Pneumonia classification        | SpO2 | Pulse oximetry (maker and model)                    |
|---------------------|------|------------------------------------------|--------------------|----------------------------------------------------------------------------|----------|---------------------------------|------|-----------------------------------------------------|
| Alwadhi et al.      | 2017 | Indian Pediatrics                        | Asia               | India                                                                      | Low      | Very severe or severe pneumonia | 90   | Ohmeda Biox 3700e pulse oximeter                    |
| Asghar et al.       | 2008 | BMJ Open                                 | Multiple Continent | Bangladesh, Ecuador, India, Mexico, Pakistan, Yemen and Zambia             | Low      | Very severe or severe pneumonia | 90   | Not mentioned                                       |
| Ashraf et al.       | 2008 | Archives of Disease in Childhood, BMJ    | Asia               | Bangladesh                                                                 | Low      | Very severe or severe pneumonia | 95   | Not mentioned                                       |
| Ashraf et al.       | 2010 | Pediatrics                               | Asia               | Bangladesh                                                                 | Low      | Very severe or severe pneumonia | 95   | Not mentioned                                       |
| Basnet et al.       | 2015 | PLoS ONE                                 | Asia               | Nepal                                                                      | High     | Very severe or severe pneumonia | 90   | Nellcor Puritan Bennett NPB-40, Pleasanton, CA, USA |
| Bassat et al.       | 2016 | Tropical Medicine & International Health | Africa             | Southern Mozambique                                                        | Low      | Very severe or severe pneumonia | 90   | Nellcor, Boulder, CO                                |
| Breiman et al.      | 2015 | BMC Infectious Diseases                  | Africa             | Kenya                                                                      | Low      | Very severe or severe pneumonia | 90   | Not mentioned                                       |
| Chisti et al.       | 2011 | PLoS ONE                                 | Asia               | Bangladesh                                                                 | Low      | Very severe or severe pneumonia | 90   | Not mentioned                                       |
| Dembele et al.      | 2019 | Bmj Open                                 | Asia               | Phillipines                                                                | Low      | Very severe or severe pneumonia | 90   | Handheld Pulse Oximeter PalmSAT 2500A with Finger   |
| Fancourt et al.     | 2017 | Clinical Infectious Disease              | Multiple Continent | Kenya, The Gambia, Mali, Zambia, South Africa, Thailand, Bangladesh        | Low      | Very severe or severe pneumonia | 92   | Not mentioned                                       |
| Gallagher et al.    | 2020 | Clinical Infectious Diseases             | Multiple Continent | Asia and Africa                                                            | Mixed    | Very severe or severe pneumonia | 92   | Not mentioned                                       |
| Graham et al.       | 2020 | EClinicalMedicine                        | Africa             | Nigeria                                                                    | Low      | Very severe or severe pneumonia | 90   | Not mentioned                                       |
| Izadnegahdar et al. | 2012 | Journal of Pediatric Infectious Diseases | Multiple Continent | Colombia, Ghana, India, Mexico, Pakistan, South Africa, Vietnam and Zambia | Low      | Very severe or severe pneumonia | 92   | Nellcor N-20E, N-25 secors, Pleasanton, CA, USA     |
| Jain et al.         | 2013 | Indian Pediatrics                        | Asia               | India                                                                      | Low      | Very severe or severe pneumonia | 90   | Not mentioned                                       |
| Kuti et al.         | 2013 | ISRN Pediatrics                          | Africa             | Gambia                                                                     | Low      | Very severe or severe pneumonia | 90   | Nellcor N-200, USA                                  |

|                    |      |                                                      |               |                  |     |                                 |    |                                                                                                |
|--------------------|------|------------------------------------------------------|---------------|------------------|-----|---------------------------------|----|------------------------------------------------------------------------------------------------|
| Ma et al.          | 2019 | American Journal of Tropical Medicine and Hygiene    | Africa        | Uganda           | Low | Very severe or severe pneumonia | 90 | Not mentioned                                                                                  |
| McCollum et al.    | 2019 | Lancet Respir Med                                    | Africa        | Malawi           | Low | Very severe or severe pneumonia | 90 | Rad5 Masimo, Irvine, CA, USA                                                                   |
| Nantanda et al.    | 2008 | Annals of Tropical Paediatrics                       | Africa        | Uganda           | Low | Very severe or severe pneumonia | 92 | Not mentioned                                                                                  |
| Sigauque et al.    | 2009 | Journal of Tropical Pediatrics                       | Africa        | Mozambican       | Low | Very severe or severe pneumonia | 90 | Nellcor                                                                                        |
| Sempertegui et al. | 2014 | American Journal of Clinical Nutrition               | South America | Ecuador          | Low | Very severe or severe pneumonia | 90 | OxiMax N-65; Nellcor                                                                           |
| Srinivasan et al.  | 2012 | BMC medicine                                         | Africa        | Uganda           | Low | Very severe or severe pneumonia | 92 | Ohmeda Biox 3700<br>Ohmeda GE healthcare,<br>Pollards Wood Chalfont St. Giles Bucks HP8 4SP UK |
| Tesfaye et al.     | 2020 | Bmj Open                                             | Africa        | Ethiopia         | Low | Very severe or severe pneumonia | 90 | ADC Adimals 2150                                                                               |
| Tiewsoh et al.     | 2009 | BMC Pediatrics                                       | Asia          | India            | Low | Very severe or severe pneumonia | 90 | Not mentioned                                                                                  |
| Webb et al.        | 2012 | Journal of Pediatric Infectious Diseases             | Africa        | Kenya            | Low | Very severe or severe pneumonia | 90 | Neclor USA                                                                                     |
| Blanc et al.       | 2019 | PLoS One                                             | Africa        | PNG              | Low | Unclassified pneumonia          | 90 | Nellcor Pulse OxyMax N-20PA                                                                    |
| Chisti et al.      | 2012 | Tropical Medicine & International Health             | Asia          | Bangladesh       | Low | Unclassified pneumonia          | 90 | OxiMax N-600; Nellcor, Boulder, CO, USA                                                        |
| Duke et al.        | 2008 | Lancet                                               | Africa        | Papua New Guinea | Low | Unclassified pneumonia          | 90 | Not mentioned                                                                                  |
| Hooli et al.       | 2020 | American Journal of Tropical Medicine and Hygiene    | Africa        | Malawi           | Low | Unclassified pneumonia          | 90 | Lifebox                                                                                        |
| Janabi et al.      | 2009 | Iraqi Postgrad. Med. J.                              | Asia          | Iraq             | Low | Unclassified pneumonia          | 90 | Kontron Medical B.P:7845                                                                       |
| Kelly et al.       | 2014 | Journal of the Pediatric Infectious Diseases Society | Africa        | Bostwana         | Low | Unclassified pneumonia          | 90 | Not mentioned                                                                                  |
| Kurade et al.      | 2018 | Journal of Tropical Pediatrics                       | Asia          | India            | Low | Unclassified pneumonia          | 90 | Not mentioned                                                                                  |
| Laghari et al.     | 2019 | Cureus                                               | Asia          | Pakistan         | Low | Unclassified pneumonia          | 92 | Not mentioned                                                                                  |
| Lima et al.        | 2015 | Pediatric Health, Medicine, and Therapeutics         | South America | Brazil           | Low | Unclassified pneumonia          | 92 | Not mentioned                                                                                  |
| Ma et al.          | 2019 | American Journal of Tropical Medicine and Hygiene    | Africa        | Uganda           | Low | Unclassified pneumonia          | 90 | Not mentioned                                                                                  |

|                   |      |                                                                    |               |              |      |                        |    |                                                                                        |
|-------------------|------|--------------------------------------------------------------------|---------------|--------------|------|------------------------|----|----------------------------------------------------------------------------------------|
| Mackenzie et al.  | 2017 | Lancet Infectious Disease                                          | Africa        | Gambia       | Low  | Unclassified pneumonia | 92 | Nellcor N-65, Covidian, Boulder, CO, USA                                               |
| Mathisen et al.   | 2010 | Pediatric Infectious Disease Journal                               | Asia          | Nepal        | High | Unclassified pneumonia | 93 | Siemens MicroO2, Siemens Medical Systems Inc, Danvers, MA with Nellcor, Pleasanton, CA |
| McCollum et al.   | 2017 | Plos One                                                           | Africa        | Malawi       | Low  | Unclassified pneumonia | 90 | Masimo (R) Hospitals or Lifebox (R)                                                    |
| McCollum et al.   | 2016 | Bulletin of the World Health Organization                          | Africa        | Malawi       | Low  | Unclassified pneumonia | 90 | Lifebox                                                                                |
| McCracken et al.  | 2013 | The Journal of Infectious Diseases                                 | South America | Guatemala    | High | Unclassified pneumonia | 90 | Not mentioned                                                                          |
| Orimadegun et al. | 2013 | Transactions of the Royal Society of Tropical Medicine and Hygiene | Africa        | Nigeria      | Low  | Unclassified pneumonia | 90 | True Colour OLED fingertip oximeters                                                   |
| Rao et al.        | 2012 | World Journal of Pediatrics                                        | Asia          | India        | Low  | Unclassified pneumonia | 90 | Nellcor Puritan Bennett NPB-40                                                         |
| Shrestha et al.   | 2020 | Plos One                                                           | Asia          | Nepal        | High | Unclassified pneumonia | 90 | Mini SPO2, Criticare Systems, USA                                                      |
| Smith et al.      | 2011 | Lancet                                                             | South America | Guatemala    | High | Unclassified pneumonia | 87 | Not mentioned                                                                          |
| Thomas et al.     | 2015 | Tropical Medicine & International Health                           | Asia          | Philippines  | Low  | Unclassified pneumonia | 90 | Not mentioned                                                                          |
| Tran et al.       | 2016 | Epidemiol Infect.                                                  | Asia          | Vietnam      | Low  | Unclassified pneumonia | 92 | Siemens Micro Oe, Siemens Medical Systems Inc, USA                                     |
| Tran et al.       | 2014 | Journal of Medical Virology                                        | Asia          | Vietnam      | Low  | Unclassified pneumonia | 92 | Not mentioned                                                                          |
| Yalçın et al.     | 2018 | Indian Journal of Pediatrics                                       | Asia          | Turkey       | Low  | Unclassified pneumonia | 93 | PM-60, Mindray, China                                                                  |
| Oktaria et al.    | 2021 | PLoS One                                                           | Asia          | Indonesia    | Low  | Unclassified pneumonia | 90 | Not mentioned                                                                          |
| Roux et al.       | 2021 | PLoS One                                                           | Africa        | South Africa | low  | Unclassified pneumonia | 92 | Not mentioned                                                                          |
| Saleh et al.      | 2021 | Padiatric Research                                                 | Africa        | Egypt        | Low  | Unclassified pneumonia | 94 | Not mentioned                                                                          |

|                    |      |                                           |        |                  |     |                      |    |                                         |
|--------------------|------|-------------------------------------------|--------|------------------|-----|----------------------|----|-----------------------------------------|
| Rahman et al.      | 2021 | Journal of Global Health                  | Asia   | Bangladesh       | low | Severe pneumonia     | 90 | OxiMax N-600; Nellcor, Boulder, CO, USA |
| Muro et al.        | 2020 | PLOS ONE                                  | Africa | Tanzania         | Low | Severe pneumonia     | 90 | Not mentioned                           |
| Lenahan et al.     | 2020 | Erj Open Research                         | Africa | Malawi           | Low | Non-severe pneumonia | 90 | Not mentioned                           |
| Morre et al.       | 2019 | Journal of Tropical Pediatrics            | Africa | Papua New Guinea | Low | Non-severe pneumonia | 90 | Not mentioned                           |
| Mwaniki et al.     | 2009 | Bulletin of the World Health Organization | Africa | Kenya            | Low | Non-severe pneumonia | 90 | Nellcor Puritan Bennett NPB-40, USA     |
| Nemani et al.      | 2016 | Clinical Epidemiology and Global health   | Asia   | India            | Low | Non-severe pneumonia | 92 | SHO 3002, Harsons, India                |
| Puumalainen et al. | 2008 | BMC Infectious Diseases                   | Asia   | Philippines      | Low | Non-severe pneumonia | 90 | BCI 3303 ximeter (Waukeha, USA)         |









**Supplementary Table 7: I<sup>2</sup> and  $\tau^2$  value for measure of heterogeneity across studies**

| Categories                   | Sub-categories                           | Heterogeneity statistic | DF | P-value | I <sup>2</sup> | $\tau^2$ |
|------------------------------|------------------------------------------|-------------------------|----|---------|----------------|----------|
| Region                       | Asia                                     | 2722.26                 | 23 | 0       | 99.16%         | 0.16     |
|                              | Africa                                   | 6815.26                 | 27 | 0       | 99.60%         | 0.13     |
|                              | South America                            | 1163.17                 | 4  | 0       | 99.66%         | 0.32     |
|                              | Multiple continent                       | 649.64                  | 3  | 0       | 99.54%         | 0.12     |
| Altitude                     | High                                     | 736.45                  | 5  | 0       | 99.32%         | 0.13     |
|                              | Low                                      | 13687.19                | 53 | 0       | 99.61%         | 0.17     |
| Facility type                | Tertiary level referral facilities       | 3886.90                 | 31 | 0       | 99.20%         | 0.21     |
|                              | Primary or secondary referral facilities | 1109.11                 | 12 | 0       | 98.92%         | 0.11     |
|                              | Health centres                           | 604.13                  | 5  | 0       | 99.17%         | 0.17     |
|                              | Mixed setting                            | 1794.99                 | 5  | 0       | 99.72%         | 0.2      |
| Type of patients             | Emergency                                | 476.44                  | 7  | 0       | 98.53%         | 0.25     |
|                              | Inpatient                                | 4935.40                 | 34 | 0       | 99.31%         | 0.15     |
|                              | Outpatient                               | 2270                    | 12 | 0       | 99.47%         | 0.16     |
|                              | Mixed                                    | 931.8                   | 4  | 0       | 99.57%         | 0.04     |
| Hospitalisation status       | Hospitalised                             | 6166.21                 | 42 | 0       | 99.32%         | 0.18     |
|                              | Non-hospitalised                         | 2515.64                 | 12 | 0       | 99.52%         | 0.19     |
|                              | Mixed                                    | 918.55                  | 3  | 0       | 99.67%         | 0.04     |
| Clinical severity            | Non-severe pneumonia                     | 108.07                  | 4  | 0       | 96.30%         | 0.06     |
|                              | Unclassified pneumonia                   | 5496.68                 | 27 | 0       | 99.51%         | 0.1      |
|                              | Very severe or severe pneumonia          | 5013.99                 | 27 | 0       | 99.46%         | 0.18     |
| Assessor                     | Doctor                                   | 2674.06                 | 15 | 0       | 99.44%         | 0.32     |
|                              | Nurse/paramedics                         | 3691.52                 | 12 | 0       | 99.67%         | 0.08     |
| WHO IMCI 2014 classification | Pre                                      | 13470.43                | 47 | 0       | 99.65%         | 0.16     |
|                              | Post                                     | 1261.32                 | 12 | 0       | 99.05%         | 0.25     |
| Publication Year             | Before 2015                              | 4087.45                 | 27 | 0       | 99.34%         | 0.20     |
|                              | 2015 and after                           | 9981.15                 | 32 | 0       | 99.68%         | 0.15     |
| SpO <sub>2</sub> Cut off     | 90%                                      | 10525.38                | 41 | 0       | 99.61%         | 0.18     |
|                              | Others                                   | 5108.22                 | 18 | 0       | 99.65%         | 0.24     |

**Supplementary table 8: Number of articles using different database**

| Database           | #   |
|--------------------|-----|
| MEDLINE            | 425 |
| EMBASE             | 807 |
| GLOBAL HEALTH      | 130 |
| Cochrane           | 153 |
| Clinicaltrials.gov | 85  |

|                            |      |
|----------------------------|------|
| SCOPUS                     | 665  |
| CINHAL                     | 66   |
| PubMed                     | 907  |
| Global Index Medicus (WHO) | 376  |
| IndMed (Advanced)          | 33   |
| Web of Science (Advanced)  | 628  |
|                            | 4275 |

**Supplementary table 9: Number of studies across sub-groups among WHO classified pneumonia**

| Categories             | Sub-categories                           | Number of Studies (#57) |
|------------------------|------------------------------------------|-------------------------|
| Region                 | Asia                                     | 23                      |
|                        | Africa                                   | 26                      |
|                        | South America                            | 4                       |
|                        | Multiple continent                       | 4                       |
| Altitude               | High                                     | 5                       |
|                        | Low                                      | 51                      |
|                        | Mixed                                    | 1                       |
| Facility type          | Tertiary level referral facilities       | 30                      |
|                        | Primary or secondary referral facilities | 12                      |
|                        | Health centres                           | 5                       |
|                        | Mixed setting                            | 6                       |
|                        | Not reported                             | 3                       |
| Type of patients       | Emergency                                | 8                       |
|                        | Inpatient                                | 32                      |
|                        | Outpatient                               | 12                      |
|                        | Mixed                                    | 5                       |
| Hospitalisation status | Hospitalised                             | 40                      |
|                        | Non-hospitalised                         | 12                      |
|                        | Mixed                                    | 4                       |
|                        | Not reported                             | 1                       |
| Assessor               | Doctor                                   | 15                      |
|                        | Nurse/paramedics                         | 12                      |
|                        | Doctors/nurses/paramedics                | 2                       |
|                        | Non clinical                             | 2                       |
|                        | Not mentioned                            | 23                      |
| PO type mentioned      | Yes                                      | 29                      |
|                        | No                                       | 28                      |
| PO probe type          | Adult                                    | 1                       |
|                        | Paediatric                               | 13                      |
|                        | Not reported                             | 43                      |
| SpO2 cut off           | 87%                                      | 1                       |
|                        | 90%                                      | 38                      |

|  |        |    |
|--|--------|----|
|  | 92%    | 12 |
|  | 93%    | 2  |
|  | 94%    | 1  |
|  | 95%    | 2  |
|  | 90-93% | 1  |

**Supplementary table 10: Prevalence of hypoxaemia among WHO -classified pneumonia before and after the change in pneumonia classification in 2014**

| Pneumonia classification | IMCI                    | Prevalence of hypoxaemia | Lower limit | Upper limit |
|--------------------------|-------------------------|--------------------------|-------------|-------------|
| Very severe or severe    | Pre 2014 (n = 24)       | 41                       | 32          | 50          |
|                          | 2014 and after (n = 4)  | 40                       | 37          | 43          |
| Non-severe               | Pre 2014 (n = 3)        | 10                       | 2           | 24          |
|                          | 2014 and after (n = 2)  | 7                        | 5           | 10          |
| Unclassified             | Pre 2014 (n = 21)       | 23                       | 18          | 29          |
|                          | 2014 and after (n = 7)  | 32                       | 9           | 60          |
| Overall                  | Pre 2014 (n = 48)       | 31                       | 26          | 36          |
|                          | 2014 and after (n = 13) | 29                       | 17          | 42          |

**Supplementary table 11: Hypoxaemia prevalence (presented in %) among children with WHO -classified pneumonia, comparison between random-effects pooled estimate (95% confidence interval) and median (with interquartile range) across different subgroups**

|        |                              | Random Effects pooled estimate | 95% Confidence Interval |             | Median | Q1 | Q3 |
|--------|------------------------------|--------------------------------|-------------------------|-------------|--------|----|----|
|        |                              |                                | Lower limit             | Upper limit |        |    |    |
|        | Overall Pooled WHO Pneumonia | 31                             | 26                      | 36          | 29     | 14 | 49 |
| Region | Asia                         | 31                             | 24                      | 39          | 32     | 16 | 54 |
|        | Africa                       | 28                             | 22                      | 34          | 27     | 9  | 40 |
|        | South America                | 38                             | 16                      | 62          | 28     | 26 | 51 |
|        | Multiple continent           | 36                             | 21                      | 54          | 34     | 24 | 50 |

|                                     |                                |    |    |    |    |    |    |
|-------------------------------------|--------------------------------|----|----|----|----|----|----|
| <b>Altitude</b>                     | High                           | 33 | 20 | 47 | 29 | 26 | 58 |
|                                     | Low                            | 30 | 25 | 35 | 28 | 14 | 49 |
| <b>Facility Type</b>                | Referral - Tertiary            | 29 | 22 | 36 | 28 | 15 | 44 |
|                                     | Referral - Primary / Secondary | 42 | 33 | 51 | 40 | 28 | 57 |
|                                     | Health Centre                  | 25 | 12 | 40 | 26 | 9  | 44 |
|                                     | Mixed setting                  | 39 | 23 | 57 | 36 | 13 | 65 |
| <b>Type of patients</b>             | Emergency                      | 47 | 30 | 64 | 50 | 33 | 60 |
|                                     | Inpatient                      | 32 | 26 | 38 | 32 | 18 | 42 |
|                                     | Outpatient                     | 23 | 15 | 33 | 26 | 7  | 35 |
|                                     | Mixed                          | 17 | 11 | 24 | 16 | 8  | 18 |
| <b>Hospitalisation Status</b>       | Hospitalised                   | 33 | 27 | 39 | 32 | 18 | 49 |
|                                     | Non-hospitalised               | 29 | 19 | 40 | 30 | 9  | 51 |
|                                     | Mixed                          | 17 | 10 | 24 | 12 | 6  | 34 |
| <b>Clinical severity</b>            | Very severe or severe          | 41 | 33 | 49 | 39 | 27 | 57 |
|                                     | Unclassified                   | 25 | 20 | 31 | 26 | 9  | 38 |
|                                     | Non-severe                     | 8  | 3  | 16 | 8  | 4  | 14 |
| <b>Assessor</b>                     | Doctor                         | 41 | 28 | 55 | 39 | 23 | 58 |
|                                     | Nurse / paramedics             | 16 | 10 | 23 | 9  | 5  | 28 |
| <b>WHO IMCI 2014 classification</b> | Pre                            | 31 | 26 | 36 | 28 | 15 | 51 |
|                                     | Post                           | 29 | 17 | 42 | 32 | 14 | 42 |
| <b>Publication Year</b>             | Before 2015                    | 33 | 25 | 41 | 30 | 18 | 54 |
|                                     | 2015 and after                 | 29 | 23 | 35 | 28 | 13 | 42 |
| <b>SpO2 Cut off</b>                 | ≤90%                           | 32 | 26 | 38 | 30 | 14 | 55 |
|                                     | Others                         | 27 | 18 | 38 | 29 | 18 | 36 |

**Supplementary table 12: List of articles dropped with reason**

| ID | Title                                                                                                                                                                                                                                              | Reason for exclusion |
|----|----------------------------------------------------------------------------------------------------------------------------------------------------------------------------------------------------------------------------------------------------|----------------------|
| 1  | Nasal continuous positive airway pressure combined midazolam for micro pump infusion for severe pneumonia in infants                                                                                                                               | Full text not found  |
| 2  | Accuracy of selected devices for the detection of pneumonia symptoms-results from laboratory testing and field evaluations of respiratory rate counters and pulse oximeters with frontline health workers in sub-Saharan Africa and Southeast Asia | Full text not found  |
| 3  | Non-invasive positive pressure ventilation to reduce childhood mortality from acute respiratory failure in rural Ghana                                                                                                                             | Full text not found  |
| 4  | Clinical predictors of hypoxemia in children with acute respiratory tract infection admitted in pediatric department of Southe Valley university hospital                                                                                          | Full text not found  |
| 5  | Cost illness of RSV infection in Colombia                                                                                                                                                                                                          | Full text not found  |
| 6  | Discrimination of pneumonia from other lower respiratory tract infections (LRTI) in children aged 0 to 5 years living at high altitude in Peru                                                                                                     | Full text not found  |
| 7  | Viral and bacterial causes of severe acute respiratory illness among children aged less than 5 years in a high malaria prevalence area of Western Kenya, 2007-2010                                                                                 | Full text not found  |
| 8  | Pneumocystis jirovecii pneumonia among HIV-exposed, uninfected children in Botswana                                                                                                                                                                | Full text not found  |
| 9  | Can we distinguish pneumonia from wheezy diseases in tachypnoeic children under low-resource conditions? A prospective observational study in four Indian hospitals                                                                                | Full text not found  |
| 10 | Impact of Human Immunodeficiency Virus Infection on the Etiology and Outcome of Severe Pneumonia in Malawian Children                                                                                                                              | Full text not found  |
| 11 | The combination of CRP, myocardial enzymes measurement and blood gas analysis in neonatal pneumonia                                                                                                                                                | Full text not found  |
| 12 | Detection of myocardial enzymes, cardiac troponin T and hepatic and renal function in the diagnosis and treatment of severe pneumonia in children                                                                                                  | Full text not found  |
| 13 | Value of lung ultrasound on diagnosing transient tachypnea of newborn                                                                                                                                                                              | Full text not found  |
| 14 | Clinical characteristics of Mycoplasma pneumoniae pneumonia with different imaging changes in children                                                                                                                                             | Full text not found  |
| 15 | Effect of Tanreqing injection assisted Ganciclovir on children with respiratory syncytial virus pneumonia                                                                                                                                          | Full text not found  |
| 16 | [Nasal continuous positive airway pressure ventilation in children with community-acquired pneumonia under five years of age: a prospective, multi-center clinical study]                                                                          | Full text not found  |
| 17 | Role of zinc in severe pneumonia                                                                                                                                                                                                                   | Full text not found  |
| 18 | Performance of the world health organization diagnostic criteria for pneumonia in hospitalized Malawian infants with exposure to human immunodeficiency virus                                                                                      | Full text not found  |
| 19 | Assessment of pneumonia in children in resource-limited settings                                                                                                                                                                                   | Full text not found  |
| 20 | Stunting predicts poor outcome in children with severe pneumonia                                                                                                                                                                                   | Full text not found  |
| 21 | Blood oxygen saturation levels associated with respiratory viruses in children hospitalized with pneumonia in Guatemala, 2008-2011                                                                                                                 | Full text not found  |
| 22 | Clinical and radiologic features of pneumonia caused by staphylococcus aureus and streptococcus pneumoniae                                                                                                                                         | Full text not found  |
| 23 | Obstructive respiratory disease complicating pneumonia in children; possible role of viruses in a resource poor setting                                                                                                                            | Full text not found  |
| 24 | An observational study of peripheral muscle oxygenation using nirs in a cohort of nourished and malnourished children with pneumonia                                                                                                               | Full text not found  |
| 25 | Predictors of treatment failure among infants with acute lower respiratory infection due to respiratory syncytial virus in Botswana                                                                                                                | Full text not found  |
| 26 | Lactate as a predictor of mortality in Malawian children with WHO-defined pneumonia                                                                                                                                                                | Full text not found  |
| 27 | Predictors of prolonged length of hospital stay for infants with bronchiolitis                                                                                                                                                                     | Full text not found  |
| 28 | Efficacy of Bronchodilators in Wheeze Associated Respiratory Tract Infections                                                                                                                                                                      | Full text not found  |
| 29 | Prevalence of hypoxemia in under-five children with pneumonia in an emergency pediatrics hospital in Sudan                                                                                                                                         | Full text not found  |
| 30 | [Analysis of clinical manifestations of 159 hospitalized children infected with 2009 novel influenza A (H1N1) virus]. [Chinese]                                                                                                                    | Full text not found  |
| 31 | Prevalence of human coronavirus infection in children with acute lower respiratory tract infection                                                                                                                                                 | Full text not found  |
| 32 | Barriers to pediatric inpatient care guideline adherence: A mixed method assessment of eight hospitals in Asia and Africa                                                                                                                          | Full text not found  |
| 33 | Human rhinovirus infections in hospitalized children: clinical, epidemiological and virological features                                                                                                                                           | Full text not found  |

|    |                                                                                                                                                                                 |                                                      |
|----|---------------------------------------------------------------------------------------------------------------------------------------------------------------------------------|------------------------------------------------------|
| 34 | Viral and bacterial etiologies of community-acquired acute lower respiratory infections among hospitalized Cambodian patients                                                   | Full text not found                                  |
| 35 | Efficacy of mechanical expectoration combined with oxygen inhalation treatment of infant bronchiolitis                                                                          | Full text not found                                  |
| 36 | Interventional bronchoscopy via laryngeal mask airway (LMA) under general anesthesia in children using adult flexible bronchoscope                                              | Full text not found                                  |
| 37 | Mortality and morbidity of acute hypoxemic respiratory failure and acute respiratory distress syndrome in infants and young children                                            | Full text not found                                  |
| 38 | Response to oxygen therapy using oxygen concentrators run off solar power in children with respiratory distress in remote primary health facilities in Papua New Guinea         | Full text not found                                  |
| 39 | Clinical Profile and Predictors of Outcome of Pediatric Acute Respiratory Distress Syndrome in a PICU: A Prospective Observational Study                                        | Full text not found                                  |
| 40 | Determinants of Outcome among Under-Five Children Hospitalized with Pneumonia at a Tertiary Health Facility in South-West Nigeria                                               | Full text not found                                  |
| 41 | Efficacy of high flow nasal oxygen therapy in children with acute respiratory failure                                                                                           | Full text not found                                  |
| 42 | Clinical profile, severity pattern and socio-demographic risk factors of acute lower respiratory tract infection (Alrti) in children in Enugu, Nigeria                          | Full text not found                                  |
| 43 | Hypoxemia predicts death from severe falciparum malaria among children under 5 years of age in Nigeria: The need for pulse oximetry in case management                          | Hypoxaemia prevalence/denominator could not be found |
| 44 | Density of upper respiratory colonization with Streptococcus pneumoniae and its role in the diagnosis of pneumococcal pneumonia among children aged <5 years in the PERCH study | Hypoxaemia prevalence/denominator could not be found |
| 45 | Nutritional rickets and vitamin D deficiency - Association with the outcomes of childhood very severe pneumonia: A prospective cohort study                                     | Hypoxaemia prevalence/denominator could not be found |
| 46 | Zinc supplementation in severe acute lower respiratory tract infection in children: A triple-blind randomized placebo controlled trial                                          | Hypoxaemia prevalence/denominator could not be found |
| 47 | High Mortality Risk in Hypoglycemic and Dysglycemic Children Admitted at a Referral Hospital in a Non Malaria Tropical Setting of a Low Income Country                          | Hypoxaemia prevalence/denominator could not be found |
| 48 | Oil instillation pneumonia - A social evil                                                                                                                                      | Hypoxaemia prevalence/denominator could not be found |
| 49 | Child mortality after discharge from a health facility following suspected pneumonia, meningitis or septicaemia in rural Gambia: A cohort study                                 | Hypoxaemia prevalence/denominator could not be found |
| 50 | Predictors of death in under-five children with diarrhoea admitted to a critical care ward in an urban hospital in Bangladesh                                                   | Hypoxaemia prevalence/denominator could not be found |
| 51 | Bubble continuous positive airway pressure for children with severe pneumonia and hypoxaemia in Bangladesh: an open, randomised controlled trial                                | Hypoxaemia prevalence/denominator could not be found |
| 52 | Incidence and characteristics of early childhood wheezing, Dhaka, Bangladesh, 2004-2010                                                                                         | Hypoxaemia prevalence/denominator could not be found |
| 53 | Safety of induced sputum collection in children hospitalized with severe or very severe pneumonia                                                                               | Hypoxaemia prevalence/denominator could not be found |
| 54 | Humoral immune responses to Pneumocystis jirovecii antigens in HIV-infected and uninfected young children with Pneumocystis pneumonia                                           | Hypoxaemia prevalence/denominator could not be found |
| 55 | Utility and feasibility of integrating pulse oximetry into the routine assessment of young infants at primary care clinics in Karachi, Pakistan: A cross-sectional study        | Hypoxaemia prevalence/denominator could not be found |
| 56 | Early predictors of unresponsiveness to high-flow nasal cannula therapy in a pediatric emergency department                                                                     | Hypoxaemia prevalence/denominator could not be found |
| 57 | Altered regulatory cytokine profiles in cases of pediatric respiratory syncytial virus infection                                                                                | Hypoxaemia prevalence/denominator could not be found |
| 58 | Clinical predictors of chest radiographic abnormalities in young children hospitalized with bronchiolitis: a single center study                                                | Hypoxaemia prevalence/denominator could not be found |
| 59 | Improved oxygen systems in district hospitals in Lao PDR: a prospective field trial of the impact on outcomes for childhood pneumonia and equipment sustainability              | Hypoxaemia prevalence/denominator could not be found |
| 60 | Oral salbutamol for symptomatic relief in mild bronchiolitis a double blind randomized placebo controlled trial                                                                 | Hypoxaemia prevalence/denominator could not be found |
| 61 | Hypoxaemia in hospitalised under-five Nigerian children with pneumonia                                                                                                          | Hypoxaemia prevalence/denominator could not be found |
| 62 | Etiology of severe pneumonia in Ecuadorian children                                                                                                                             | Hypoxaemia prevalence/denominator could not be found |
| 63 | Pentraxin 3 as a clinical marker in children with lower respiratory tract infection                                                                                             | Hypoxaemia prevalence/denominator could not be found |
| 64 | Non-treatment of children with community health worker-diagnosed fast-breathing pneumonia in rural Malawi: Exploratory subanalysis of a prospective cohort study                | Hypoxaemia prevalence/denominator could not be found |
| 65 | Can we predict oral antibiotic treatment failure in children with fast-breathing pneumonia managed at the community level? A prospective cohort study in Malawi                 | Hypoxaemia prevalence/denominator could not be found |



|    |                                                                                                                                                                                       |                                                      |
|----|---------------------------------------------------------------------------------------------------------------------------------------------------------------------------------------|------------------------------------------------------|
| 66 | Comparing the efficacy of 7%, 3% and 0.9% saline in moderate to severe bronchiolitis in infants                                                                                       | Hypoxaemia prevalence/denominator could not be found |
| 67 | Clinical predictors of hospital admission in acute lower respiratory tract infection in 2 months to 2-year-old children                                                               | Hypoxaemia prevalence/denominator could not be found |
| 68 | Pneumocystis pneumonia in South African children diagnosed by molecular methods                                                                                                       | Hypoxaemia prevalence/denominator could not be found |
| 69 | Clinical outcomes of children with acute asthma and pneumonia in Mulago hospital, Uganda: a prospective study                                                                         | Hypoxaemia prevalence/denominator could not be found |
| 70 | Respiratory tract cryptosporidiosis is common in HIV-seronegative children with intestinal cryptosporidium and cough                                                                  | Hypoxaemia prevalence/denominator could not be found |
| 71 | Impaired gas exchange: accuracy of defining characteristics in children with acute respiratory infection. (Special Issue: Doctorate education and producing knowledge in nursing.)    | Hypoxaemia prevalence/denominator could not be found |
| 72 | Phenotypical characterization of human rhinovirus infections in severely premature children                                                                                           | Hypoxaemia prevalence/denominator could not be found |
| 73 | Development and Internal Validation of a Predictive Model Including Pulse Oximetry for Hospitalization of Under-Five Children in Bangladesh                                           | Hypoxaemia prevalence/denominator could not be found |
| 74 | Normal saline vs. hypertonic saline nebulization for acute bronchiolitis: a randomized clinical trial                                                                                 | Hypoxaemia prevalence/denominator could not be found |
| 75 | Sustainability in the AAP Bronchiolitis Quality Improvement Project                                                                                                                   | Hypoxaemia prevalence/denominator could not be found |
| 76 | Efficacy and safety of Laggera pterodonta in children 3-24 months with acute bronchiolitis: a randomized controlled trial                                                             | Hypoxaemia prevalence/denominator could not be found |
| 77 | Relation between pulse oximetry and clinical score in infants with acute bronchiolitis                                                                                                | Hypoxaemia prevalence/denominator could not be found |
| 78 | Safety and efficacy of phenylephrine nasal drops in bronchiolitis                                                                                                                     | Hypoxaemia prevalence/denominator could not be found |
| 79 | Clinical and epidemiological characteristics of pandemic influenza A/(H1N1) in hospitalized pediatric patients at a University Hospital, Istanbul, Turkey                             | Hypoxaemia prevalence/denominator could not be found |
| 80 | EV-D68 infection in children with asthma exacerbation and pneumonia in Mexico City during 2014 autumn                                                                                 | Hypoxaemia prevalence/denominator could not be found |
| 81 | Y Influenza in patients with hematological malignancies: Experience at two comprehensive cancer centers                                                                               | Hypoxaemia prevalence/denominator could not be found |
| 82 | Providing oxygen to children and newborns: a multi-faceted technical and clinical assessment of oxygen access and oxygen use in secondary-level hospitals in southwest Nigeria        | Hypoxaemia prevalence/denominator could not be found |
| 83 | Antenatal corticosteroids for women at risk of preterm delivery: the "Emperor's New Clothes" tale in medical practice                                                                 | Hypoxaemia prevalence/denominator could not be found |
| 84 | Acute respiratory illness among a prospective cohort of pediatric patients using emergency medical services in India: Demographic and prehospital clinical predictors of mortality    | Hypoxaemia prevalence/denominator could not be found |
| 85 | High-resolution Chest CT Features and Clinical Characteristics of Patients Infected with COVID-19 in Jiangsu, China                                                                   | Hypoxaemia prevalence/denominator could not be found |
| 86 | Oxygen systems to improve clinical care and outcomes for children and neonates: A stepped-wedge cluster-randomised trial in Nigeria                                                   | Hypoxaemia prevalence/denominator could not be found |
| 87 | Paediatric acute respiratory distress syndrome incidence and epidemiology (PARDIE): an international, observational study                                                             | Hypoxaemia prevalence/denominator could not be found |
| 88 | Identify clinical factors related to Mycoplasma pneumoniae pneumonia with hypoxia in children                                                                                         | Hypoxaemia prevalence/denominator could not be found |
| 89 | Respiratory Syncytial Virus Vaccination during Pregnancy and Effects in Infants                                                                                                       | Hypoxaemia prevalence/denominator could not be found |
| 90 | Respiratory compromise in children presenting to an urban emergency department of a tertiary hospital in Tanzania: a descriptive cohort study                                         | Hypoxaemia prevalence/denominator could not be found |
| 91 | Treatment of respiratory distress syndrome in premature infants: A comparison of LISA and INSURE methods in the Vietnamese context                                                    | Hypoxaemia prevalence/denominator could not be found |
| 92 | Nebulised normal saline in moderate acute bronchiolitis and pneumonia in a low- to middle-income country: a randomised trial in Papua New Guinea                                      | Hypoxaemia prevalence/denominator could not be found |
| 93 | Bubble CPAP and oxygen for child pneumonia care in Malawi: a CPAP IMPACT time motion study                                                                                            | Hypoxaemia prevalence/denominator could not be found |
| 94 | Usability and acceptability of a multimodal respiratory rate and pulse oximeter device in case management of children with symptoms of pneumonia: A cross-sectional study in Ethiopia | Hypoxaemia prevalence/denominator could not be found |
| 95 | Seizure in Children Under Five Presenting with Pneumonia in a Critical Care Ward in Bangladesh: Prevalence, Associated Factors, and Outcome                                           | Hypoxaemia prevalence/denominator could not be found |
| 96 | Response to oxygen therapy using oxygen concentrators run off solar power in children with respiratory distress in remote primary health facilities in Papua New Guinea               | Hypoxaemia prevalence/denominator could not be found |

|     |                                                                                                                                                                                                                                                                         |                                                      |
|-----|-------------------------------------------------------------------------------------------------------------------------------------------------------------------------------------------------------------------------------------------------------------------------|------------------------------------------------------|
| 97  | Randomised controlled trial of oxygen therapy and high-low nasal therapy in African children with pneumonia                                                                                                                                                             | Hypoxaemia prevalence/denominator could not be found |
| 98  | Performance of five pulse oximeters to detect hypoxaemia as an indicator of severe illness in children under five by frontline health workers in low resource settings A prospective, multicentre, single-blinded, trial in Cambodia, Ethiopia, South Sudan, and Uganda | Hypoxaemia prevalence/denominator could not be found |
| 99  | Oxygen systems and quality of care for children with pneumonia, malaria and diarrhoea: Analysis of a stepped-wedge trial in Nigeria                                                                                                                                     | Hypoxaemia prevalence/denominator could not be found |
| 100 | Limitations to current methods to estimate cause of death: a validation study of a verbal autopsy model                                                                                                                                                                 | Hypoxaemia prevalence/denominator could not be found |
| 101 | Human bocavirus-1 screening in infants with acute lower respiratory tract infection                                                                                                                                                                                     | Hypoxaemia prevalence/denominator could not be found |
| 102 | Etiology, clinical characteristics and coinfection status of bronchiolitis in Suzhou                                                                                                                                                                                    | Hypoxaemia prevalence/denominator could not be found |
| 103 | Near-Infrared Spectroscopy Monitoring of Cerebral Oxygenation and Influencing Factors in Neonates from High-Altitude Areas                                                                                                                                              | Hypoxaemia prevalence/denominator could not be found |
| 104 | Estimated Cost-effectiveness of Solar-Powered Oxygen Delivery for Pneumonia in Young Children in Low-Resource Settings                                                                                                                                                  | Hypoxaemia prevalence/denominator could not be found |
| 105 | Employing learning health system principles to advance research on severe neonatal and paediatric illness in Kenya                                                                                                                                                      | Hypoxaemia prevalence/denominator could not be found |
| 106 | Effect of ten-valent pneumococcal conjugate vaccine introduction on pneumonia hospital admissions in Fiji: a time-series analysis                                                                                                                                       | Hypoxaemia prevalence/denominator could not be found |
| 107 | Clinical characteristics of 967 children with pertussis: a single-center analysis over an 8-year period in Beijing, China                                                                                                                                               | Hypoxaemia prevalence/denominator could not be found |
| 108 | Acute respiratory illness among a prospective cohort of pediatric patients using emergency medical services in India: Demographic and prehospital clinical predictors of mortality                                                                                      | Hypoxaemia prevalence/denominator could not be found |
| 109 | The impact of pulse oximetry and Integrated Management of Childhood Illness (IMCI) training on antibiotic prescribing practices in rural Malawi: A mixed-methods study                                                                                                  | Hypoxaemia prevalence/denominator could not be found |
| 110 | Aerosol inhalation of ambroxol hydrochloride combined with terbutaline can promote recovery of children with severe pneumonia                                                                                                                                           | Hypoxaemia prevalence/denominator could not be found |
| 111 | Clinico-virological profile, intensive care needs, and outcome of infants with acute viral bronchiolitis: A prospective observational study                                                                                                                             | Hypoxaemia prevalence/denominator could not be found |
| 112 | Risk factors for mortality from severe community-acquired pneumonia in hospitalized children transferred to the pediatric intensive care unit                                                                                                                           | Hypoxaemia prevalence/denominator could not be found |
| 113 | Comparison of 3% saline and 0.9% normal saline nebulization as diluent in children with bronchiolitis                                                                                                                                                                   | Hypoxaemia prevalence/denominator could not be found |
| 114 | Morbidity pattern and outcome of children admitted to a paediatric intensive care unit of Eastern India                                                                                                                                                                 | Hypoxaemia prevalence/denominator could not be found |
| 115 | Effect of cefoperazone sulbactam sodium combined with meropenem on the immune function in the treatment of neonatal pneumonia caused by multidrug-resistant bacteria                                                                                                    | Hypoxaemia prevalence/denominator could not be found |
| 116 | A multicenter survey of pediatric flexible bronchoscopy in western China                                                                                                                                                                                                | Hypoxaemia prevalence/denominator could not be found |
| 117 | Epidemiology and genetic characterization of respiratory syncytial virus in children with acute respiratory infections: Findings from the influenza sentinel surveillance network in Central African Republic, 2015 to 2018                                             | Hypoxaemia prevalence/denominator could not be found |
| 118 | Survival and predictors of mortality among severe acute malnourished under-five children admitted at Felege-Hiwot comprehensive specialized hospital, northwest, Ethiopia: a retrospective cohort study                                                                 | Hypoxaemia prevalence/denominator could not be found |
| 119 | Severe recurrent pneumonia in children: Underlying causes and clinical profile in Vietnam                                                                                                                                                                               | Hypoxaemia prevalence/denominator could not be found |
| 120 | Antibiotic-Resistant Bacteremia in Young Children Hospitalized with Pneumonia in Bangladesh Is Associated with a High Mortality Rate                                                                                                                                    | Hypoxaemia prevalence/denominator could not be found |
| 121 | Saturation oxygenation pressure index: a non-invasive bedside measure for severity of respiratory disease in neonates on CPAP                                                                                                                                           | Hypoxaemia prevalence/denominator could not be found |
| 122 | Optimal level of positive end-expiratory pressure during nasal continuous airway pressure for severe bronchiolitis: a prospective study                                                                                                                                 | Hypoxaemia prevalence/denominator could not be found |
| 123 | Complications of pneumonia and its associated factors in a pediatric population in Osogbo, Nigeria                                                                                                                                                                      | Hypoxaemia prevalence/denominator could not be found |
| 124 | A multicentered study on efficiency of noninvasive ventilation procedures (SAFE-NIV)                                                                                                                                                                                    | Hypoxaemia prevalence/denominator could not be found |
| 125 | Risk Factors for Pneumonia Mortality in Under-five Children in a Tertiary Care Hospital of Darjeeling District of West Bengal: A Prospective Case-Control Study                                                                                                         | Hypoxaemia prevalence/denominator could not be found |
| 126 | Hypoglycaemia in children aged 1 month to 17 years admitted to the children's emergency room of Nnamdi Azikiwe University Teaching Hospital, Nnewi, Nigeria                                                                                                             | Hypoxaemia prevalence/denominator could not be found |

|     |                                                                                                                                                                                                                                                                   |                                                      |
|-----|-------------------------------------------------------------------------------------------------------------------------------------------------------------------------------------------------------------------------------------------------------------------|------------------------------------------------------|
| 127 | The role of body temperature on respiratory rate in children with acute respiratory infections                                                                                                                                                                    | Hypoxaemia prevalence/denominator could not be found |
| 128 | Venoarterial Extracorporeal Membrane Oxygenation for Severe Neonatal Acute Respiratory Distress Syndrome in a Developing Country                                                                                                                                  | Hypoxaemia prevalence/denominator could not be found |
| 129 | Community-based amoxicillin treatment for fast breathing pneumonia in young infants 7-59 days old: a cluster randomised trial in rural Bangladesh, Ethiopia, India and Malawi                                                                                     | Hypoxaemia prevalence/denominator could not be found |
| 130 | A Self-criticism of Diagnostic and Therapeutic Decision Making in Children Admitted With Acute Lower Respiratory Infection at a Single Pediatric Emergency Department                                                                                             | Hypoxaemia prevalence/denominator could not be found |
| 131 | Oxigenoterapia inalatória em pacientes pediátricos internados em hospital universitário                                                                                                                                                                           | Hypoxaemia prevalence/numerator could not be found   |
| 132 | [Clinical features and treatment of macrolide-resistant Mycoplasma pneumoniae pneumonia in children]                                                                                                                                                              | Hypoxaemia prevalence/ numerator could not be found  |
| 133 | Ventilação não invasiva na insuficiência respiratória aguda na bronquiolite por vírus sincicial respiratório                                                                                                                                                      | Hypoxaemia prevalence/ numerator could not be found  |
| 134 | Methods of a double-blind randomized controlled clinical trial of three versus five days amoxicillin dispersible tablets for chest-indrawing pneumonia among children 2-59 months of age presenting to kamuzu central hospital in Lilongwe, Malawi                | Protocol paper                                       |
| 135 | Performance, Acceptability, and Usability of Respiratory Rate Timers and Pulse Oximeters When Used by Frontline Health Workers to Detect Symptoms of Pneumonia in Sub-Saharan Africa and Southeast Asia: Protocol for a Two-Phase, Multisite, Mixed-Methods Trial | Protocol paper                                       |
| 136 | Improving oxygen therapy for children and neonates in secondary hospitals in Nigeria: study protocol for a stepped-wedge cluster randomised trial                                                                                                                 | Protocol paper                                       |
| 137 | Children's Oxygen Administration Strategies Trial (COAST): A randomised controlled trial of high flow versus oxygen versus control in African children with severe pneumonia                                                                                      | Protocol paper                                       |
| 138 | CPAP Improving Mortality for Pneumonia in African Children Trial                                                                                                                                                                                                  | Protocol paper                                       |
| 139 | Effectiveness Trial of Day-care vs. Usual Care of Severe Pneumonia & Malnutrition in Children                                                                                                                                                                     | Protocol paper                                       |
| 140 | RCT of Efficacy of Amoxicillin Over Ampicillin on Severe Pneumonia                                                                                                                                                                                                | Protocol paper                                       |
| 141 | Impact of Pulse Oximetry on Hospital Referral Acceptance in Children Under 5 With Severe Pneumonia                                                                                                                                                                | Protocol paper                                       |
| 142 | Immunomodulation by Zinc Supplementation in Children With Pneumonia                                                                                                                                                                                               | Protocol paper                                       |
| 143 | Solar-powered oxygen delivery: study protocol for a randomized controlled trial                                                                                                                                                                                   | Protocol paper                                       |
| 144 | CPAP IMPACT: a protocol for a randomised trial of bubble continuous positive airway pressure versus standard care for high-risk children with severe pneumonia using adaptive design methods                                                                      | Protocol paper                                       |
| 145 | Automated Respiratory Rate Counter to Assess Children for Symptoms of Pneumonia: Protocol for Cross-Sectional Usability and Acceptability Studies in Ethiopia and Nepal                                                                                           | Protocol paper                                       |
| 146 | Solar-powered oxygen delivery for the treatment of children with hypoxemia: protocol for a cluster-randomized stepped-wedge controlled trial in Uganda                                                                                                            | Protocol paper                                       |
| 147 | Smart triage: Triage and management of sepsis in children using the point-of-care Pediatric Rapid Sepsis Trigger (PRST) tool                                                                                                                                      | Protocol paper                                       |
| 148 | Design and conduct of facility-based surveillance for severe childhood pneumonia in the Household Air Pollution Intervention Network (HAPIN) trial                                                                                                                | Protocol paper                                       |
| 149 | Development of a Robust and Reliable Pulse Oximeter for Children With Pneumonia in Low-income Countries                                                                                                                                                           | Published before 2008                                |
| 150 | Use of Bubble Continuous Positive Airway Pressure Compared to Nasal Prong Oxygen or Humidified High Flow in Children Under Five With Severe Pneumonia and Hypoxaemia                                                                                              | Published before 2008                                |
| 151 | Assessing the Feasibility and Effectiveness of Introducing Pulse Oximetry in IMCI Services                                                                                                                                                                        | Published before 2008                                |
| 152 | CPAP Improving Mortality for Pneumonia in African Children Trial                                                                                                                                                                                                  | Published before 2008                                |
| 153 | Infant Pulse Oximetry in Pakistan Study                                                                                                                                                                                                                           | Published before 2008                                |
| 154 | Vitamin-D Supplementation: Impact on Severe Pneumonia Among Under-five Children                                                                                                                                                                                   | Published before 2008                                |
| 155 | Electronic Algorithms Based on Host Biomarkers to Manage Febrile Children                                                                                                                                                                                         | Published before 2008                                |
| 156 | Impact of Pulse Oximetry on Hospital Referral Acceptance in Children Under 5 With Severe Pneumonia                                                                                                                                                                | Published before 2008                                |
| 157 | Multimometer - Vital Signs Device for Diagnosis of Pneumonia                                                                                                                                                                                                      | Published before 2008                                |
| 158 | Randomized Controlled Trial (RCT) in Children With Severe Pneumonia                                                                                                                                                                                               | Published before 2008                                |
| 159 | Innovative Treatments in Pneumonia (ITIP) 3                                                                                                                                                                                                                       | Published before 2008                                |
| 160 | Immunomodulation by Zinc Supplementation in Children With Pneumonia                                                                                                                                                                                               | Published before 2008                                |
| 161 | RCT of Efficacy of Amoxicillin Over Ampicillin on Severe Pneumonia                                                                                                                                                                                                | Published before 2008                                |
| 162 | The Efficacy of Zinc as Adjunct Therapy in the Treatment of Severe Pneumonia in Children                                                                                                                                                                          | Published before 2008                                |
| 163 | High Flow Oxygen Therapy vs Standard Care in Infants With Viral Bronchiolitis                                                                                                                                                                                     | Published before 2008                                |
| 164 | Vitamin D Supplementation and Respiratory Index of Severity in Children (RISC) in Pneumonia                                                                                                                                                                       | Published before 2008                                |
| 165 | Nebulized Hypertonic Saline (3%) Versus Nebulized Adrenaline for Treatment of Bronchiolitis                                                                                                                                                                       | Published before 2008                                |

|     |                                                                                                                                                                                            |                       |
|-----|--------------------------------------------------------------------------------------------------------------------------------------------------------------------------------------------|-----------------------|
| 166 | Solar Powered Oxygen Delivery                                                                                                                                                              | Published before 2008 |
| 167 | Advancement of Modified Bubble CPAP                                                                                                                                                        | Published before 2008 |
| 168 | Montelukast for Acute Bronchiolitis and Postbronchiolitis Viral Induced Wheezing                                                                                                           | Published before 2008 |
| 169 | Ceftriaxone Versus Chloramphenicol for Treatment of Severe Pneumonia in Children                                                                                                           | Published before 2008 |
| 170 | A Study to Evaluate a Single IM Dose of Motavizumab Treatment of Children With RSV (Respiratory Syncytial Virus) Illness                                                                   | Published before 2008 |
| 171 | Salbutamol versus epinephrine in the treatment of acute bronchiolitis                                                                                                                      | Published before 2008 |
| 172 | Oral amoxicillin versus injectable penicillin for severe pneumonia in children aged 3 to 59 months: a randomised multicentre equivalency study                                             | Published before 2008 |
| 173 | Three day versus five day treatment with amoxicillin for non-severe pneumonia in young children: a multicentre randomised controlled trial                                                 | Published before 2008 |
| 174 | Respiratory syncytial virus and human metapneumovirus in children with acute respiratory infections in Yemen                                                                               | Published before 2008 |
| 175 | Epidemiology and clinical characteristics of respiratory syncytial virus infections in Jordan                                                                                              | Published before 2008 |
| 176 | Oral amoxicillin is as effective as injected penicillin for severe pneumonia in young children                                                                                             | Published before 2008 |
| 177 | Hypoxemia in children with pneumonia and its clinical predictors                                                                                                                           | Published before 2008 |
| 178 | Efficacy of zinc in the treatment of severe pneumonia in hospitalized children <2 y old                                                                                                    | Published before 2008 |
| 179 | Zinc for severe pneumonia in very young children: double-blind placebo-controlled trial                                                                                                    | Published before 2008 |
| 180 | Pneumonia case-finding in the RESPIRE Guatemala indoor air pollution trial: standardizing methods for resource-poor settings                                                               | Published before 2008 |
| 181 | Acquired pneumonia's behavior in a community in the pediatrics service at the Fundacion Cardio Infantil, Bogota, Colombia. [Spanish]                                                       | Published before 2008 |
| 182 | Risk factors for hypoxemia and respiratory failure in respiratory syncytial virus bronchiolitis                                                                                            | Published before 2008 |
| 183 | Case fatality proportions and predictive factors for mortality among children hospitalized with severe pneumonia in a rural developing country setting                                     | Published before 2008 |
| 184 | Treatment of respiratory syncytial virus infection with vitamin A: A randomized, placebo-controlled trial in Santiago, Chile                                                               | Published before 2008 |
| 185 | Hypoxaemia in acute respiratory and non-respiratory illnesses in neonates and children in a developing country                                                                             | Published before 2008 |
| 186 | Hypoxaemia in children with severe pneumonia in Papua New Guinea                                                                                                                           | Published before 2008 |
| 187 | Chloramphenicol versus benzylpenicillin and gentamicin for the treatment of severe pneumonia in children in Papua New Guinea: A randomised trial                                           | Published before 2008 |
| 188 | Predicting hypoxia in children with acute lower respiratory infection: A study in the highlands of Papua New Guinea                                                                        | Published before 2008 |
| 189 | PREDICTING HYPOXIA IN CHILDREN WITH ACUTE LOWER RESPIRATORY-INFECTION - A STUDY IN THE HIGHLANDS OF PAPUA-NEW-GUINEA                                                                       | Published before 2008 |
| 190 | Hypothetical performance of syndrome-based management of acute paediatric admissions of children aged more than 60 days in a Kenyan district hospital                                      | Published before 2008 |
| 191 | Causes and outcome of young infant admissions to a Kenyan district hospital                                                                                                                | Published before 2008 |
| 192 | Clinical overlap between malaria and severe pneumonia in African children in hospital                                                                                                      | Published before 2008 |
| 193 | Clinical indicators of Pneumocystis jiroveci pneumonia (PCP) in South African children infected with the human immunodeficiency virus                                                      | Published before 2008 |
| 194 | Vitamin A supplementation and severity of pneumonia in children admitted to the hospital in Dar es Salaam, Tanzania                                                                        | Published before 2008 |
| 195 | Brief hospitalization and pulse oximetry for predicting amoxicillin treatment failure in children with severe pneumonia                                                                    | Published before 2008 |
| 196 | ORAL VERSUS NEBULIZED ALBUTEROL IN THE MANAGEMENT OF BRONCHIOLITIS IN EGYPT                                                                                                                | Published before 2008 |
| 197 | Caretaker recognition of respiratory signs in children: Correlation with physical examination findings, X-ray diagnosis and pulse oximetry                                                 | Published before 2008 |
| 198 | Clinical presentation and outcome of Pneumocystis carinii pneumonia in Malawian children                                                                                                   | Published before 2008 |
| 199 | Relación entre signos clínicos e hipoxemia en niños menores de 5 años con enfermedad respiratoria aguda baja                                                                               | Published before 2008 |
| 200 | A study of some viral pathogens in infants and children with lowe respiratory tract infection and attending the intensive care unit                                                        | Published before 2008 |
| 201 | MATERNAL REPORTING OF ACUTE RESPIRATORY-INFECTION IN EGYPT                                                                                                                                 | Published before 2008 |
| 202 | The spectrum of hypoxaemia in children admitted to hospital in The Gambia, West Africa                                                                                                     | Published before 2008 |
| 203 | Evaluation of clinical and radiological signs in diagnosis of pneumonia in the first five years of life                                                                                    | Published before 2008 |
| 204 | Remark on the changes of blood gas in newborn babies with respiratory impairment due to pneumonia in the Department of Neonate at the National Institute of Pediatrics -2001 - 2002 period | Published before 2008 |
| 205 | High rates of Chlamydia trachomatis infections in young Papua New Guinean infants                                                                                                          | Published before 2008 |

|     |                                                                                                                                                                          |                                |
|-----|--------------------------------------------------------------------------------------------------------------------------------------------------------------------------|--------------------------------|
| 206 | Can Clinical Symptoms or Signs Accurately Predict Hypoxemia in Children with Acute Lower Respiratory Tract Infections?                                                   | Published before 2008          |
| 207 | Clinical predictors of acute radiological pneumonia and hypoxaemia at high altitude                                                                                      | Published before 2008          |
| 208 | Central nervous system infection is an important cause of death in underfives hospitalised with World Health Organization (WHO) defined severe and very severe pneumonia | Published before 2008          |
| 209 | The role of pulse oximetry: Its use as an indicator of severe respiratory disease in Peruvian children living at sea level                                               | Published before 2008          |
| 210 | Equivalency Of Oral Amoxicillin Vs Injectable Penicillin In Children With Severe Pneumonia                                                                               | Published before 2008          |
| 211 | Hypoxaemia in young Kenyan children with acute lower respiratory infection                                                                                               | Published before 2008          |
| 212 | Analysis of Acid-Base Disturbance Caused by Severe Pneumonia in Newborn Infants                                                                                          | Published before 2008          |
| 213 | Prevalence and prediction of hypoxemia in children with respiratory infections in the Peruvian Andes                                                                     | Published before 2008          |
| 214 | Respiratory Syncytial Virus (RSV) in infants hospitalized for acute lower respiratory tract disease: Incidence and associated risks                                      | Published before 2008          |
| 215 | Características clínicas e da saturação transcutânea de oxigênio em lactentes hospitalizados com bronquiolite viral aguda                                                | Published before 2008          |
| 216 | Clinical predictors of hypoxaemia in children with pneumonia                                                                                                             | Published before 2008          |
| 217 | Efficacy of dexamethasone injection for acute bronchiolitis in hospitalized children: A randomized, double-blind, placebo-controlled trial                               | Published before 2008          |
| 218 | Effectiveness of intramuscular penicillin versus oral amoxicillin in the early treatment of outpatient pediatric pneumonia                                               | Published before 2008          |
| 219 | Clinical predictors of hypoxaemia in Gambian children with acute lower respiratory tract infection: Prospective cohort study                                             | Published before 2008          |
| 220 | Hypoxaemia among children in rural hospitals in Papua New Guinea: Epidemiology and resource availability - A study to support a national oxygen programme                | Published before 2008          |
| 221 | Clinical Analysis of Complications of 115 Children with Serious Pneumonia with Ventilatory Support                                                                       | Published before 2008          |
| 222 | The clinical spectrum of respiratory syncytial virus disease in The Gambia                                                                                               | Published before 2008          |
| 223 | An epidemiological study of RSV infection in the Gambia                                                                                                                  | Published before 2008          |
| 224 | Long-term morbidity and mortality following hypoxaemic lower respiratory tract infection in Gambian children                                                             | Published before 2008          |
| 225 | Observational follow-up study following two cohorts of children with severe pneumonia after discharge from day care clinic/hospital in Dhaka, Bangladesh                 | Same study reported prevalence |
| 226 | Co-morbidity: Exploring the clinical overlap between pneumonia and diarrhoea in a hospital in Dhaka, Bangladesh                                                          | Same study reported prevalence |
| 227 | Risk factors for mortality in childhood pneumonia in a rural West African region                                                                                         | Same study reported prevalence |
| 228 | Predictors of prolonged hospitalisation in childhood pneumonia in a rural health centre                                                                                  | Same study reported prevalence |
| 229 | Safety, Effectiveness and Feasibility of Outpatient Management of Children with Pneumonia with Chest Indrawing at Port Moresby General Hospital, Papua New Guinea        | Same study reported prevalence |
| 230 | Impaired Gas Exchange: Prognostic Clinical Indicators of Short-Term Survival in Children with Acute Respiratory Infection                                                | Same study reported prevalence |

**Supplementary Figure 1: Hypoxaemia prevalence among non-WHO-classified pneumonia \* (presented in %)**

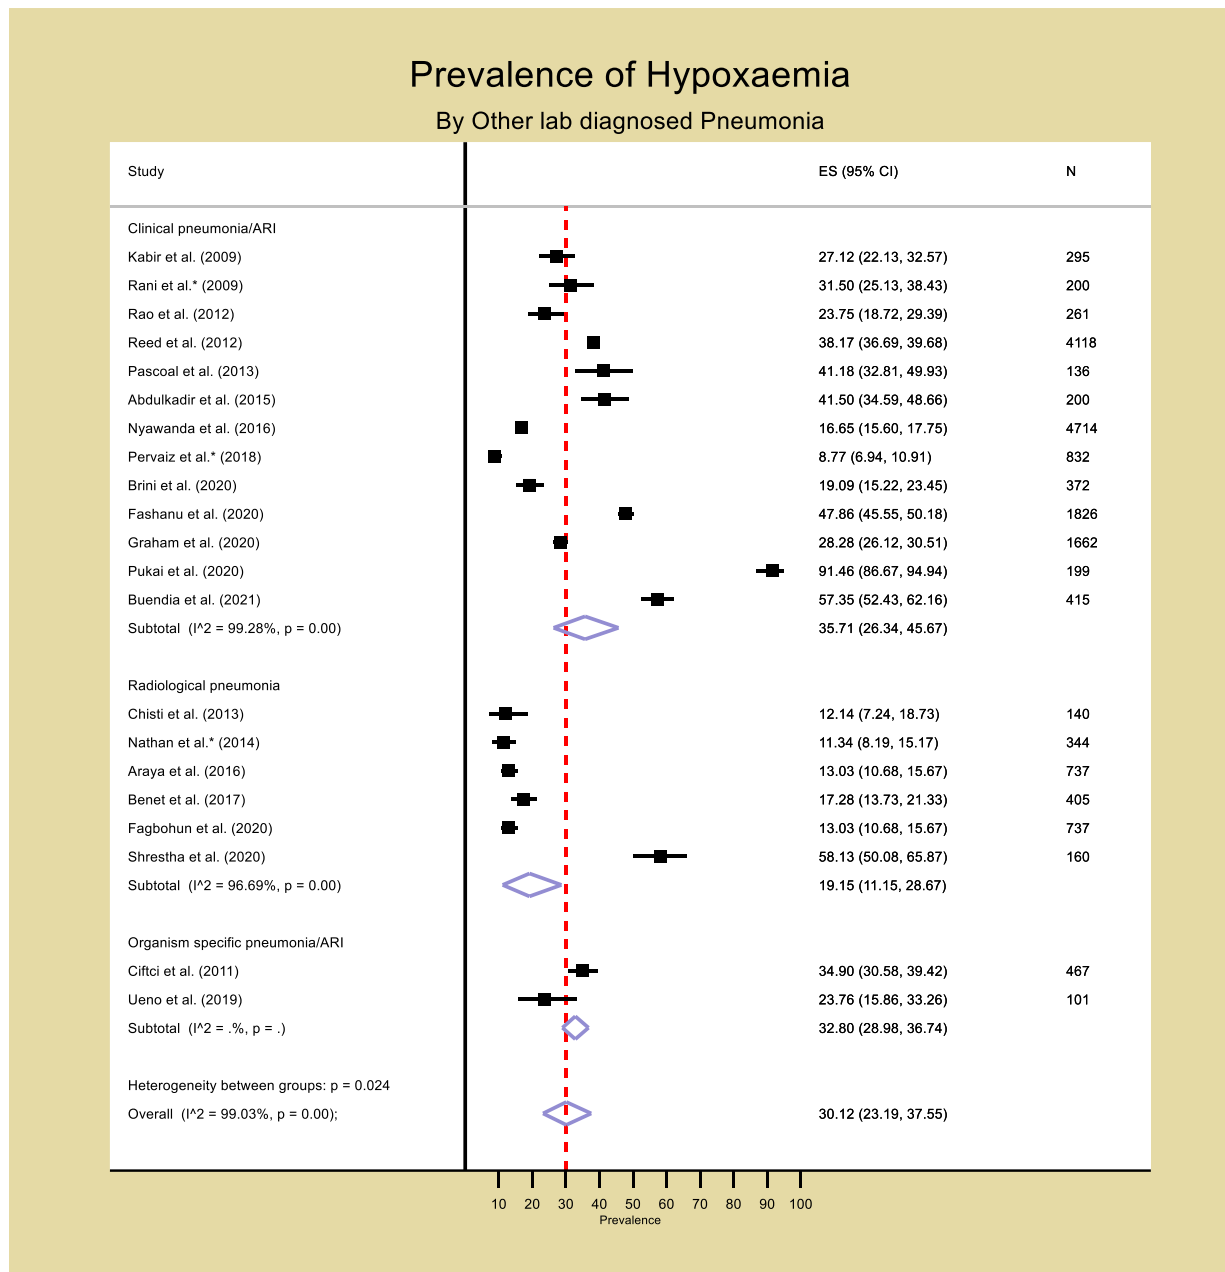

The broken red line shows the overall pooled prevalence of hypoxaemia.

\*Studies where SpO<sub>2</sub> cut-off is >90%

Supplementary figure 2a: Funnel plot to assess bias in the studies which reported hypoxaemia among non-severe cases

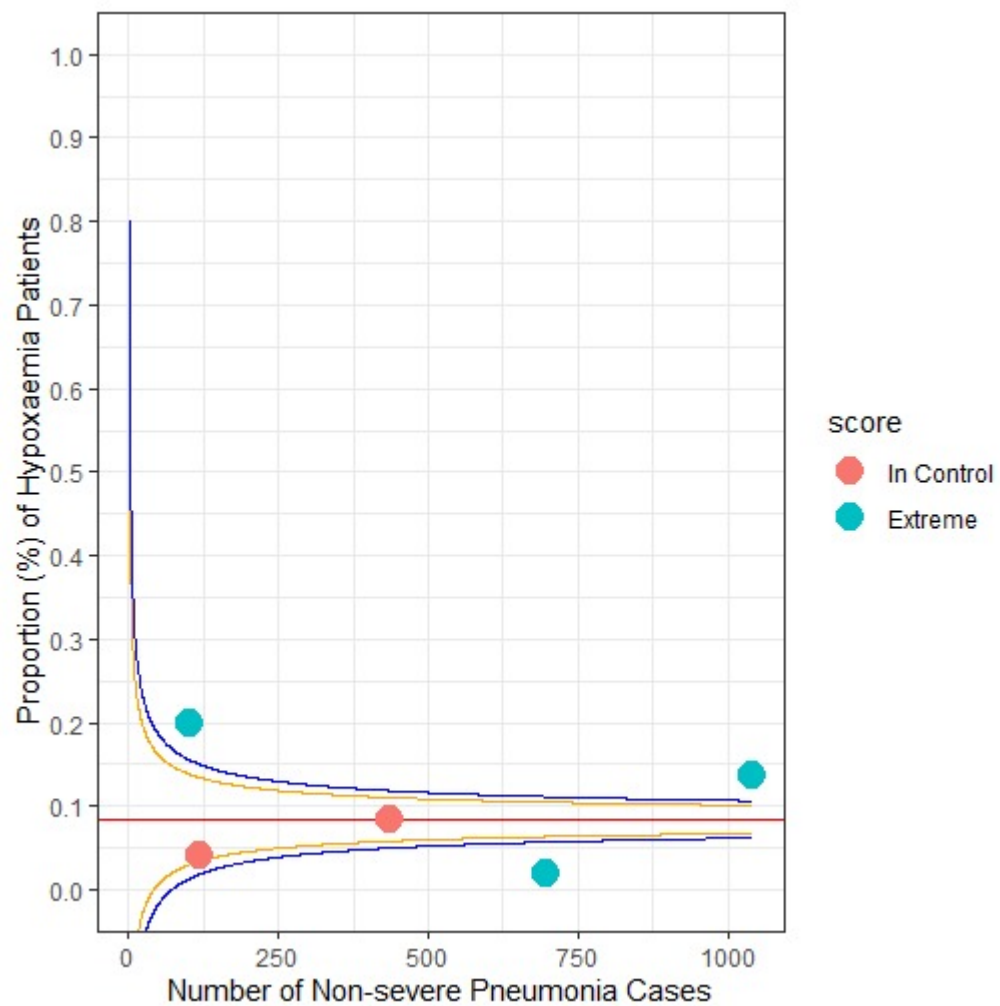

Supplementary figure 2b: Funnel plot to assess bias in the studies which reported hypoxaemia among severe or very severe cases

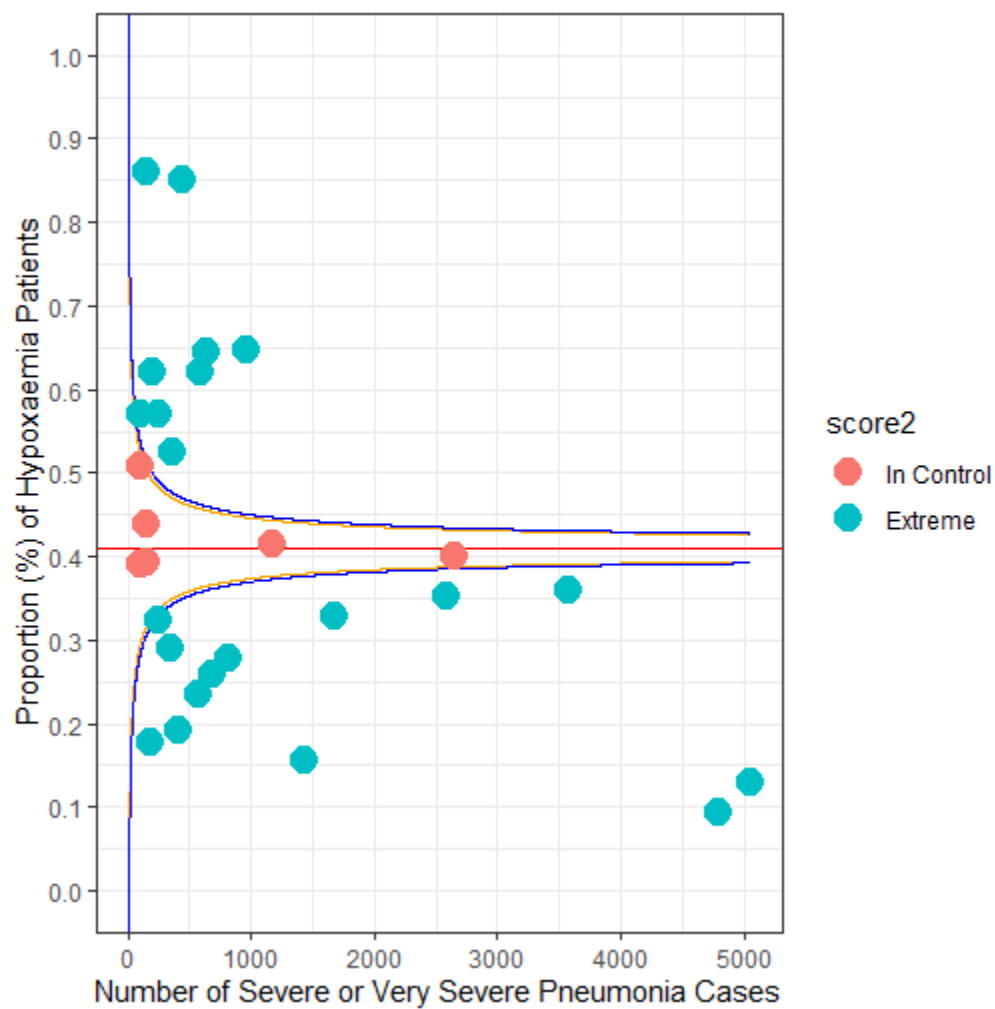



Supplementary figure 2c: Funnel plot to assess bias in the studies which reported hypoxaemia among unclassified cases

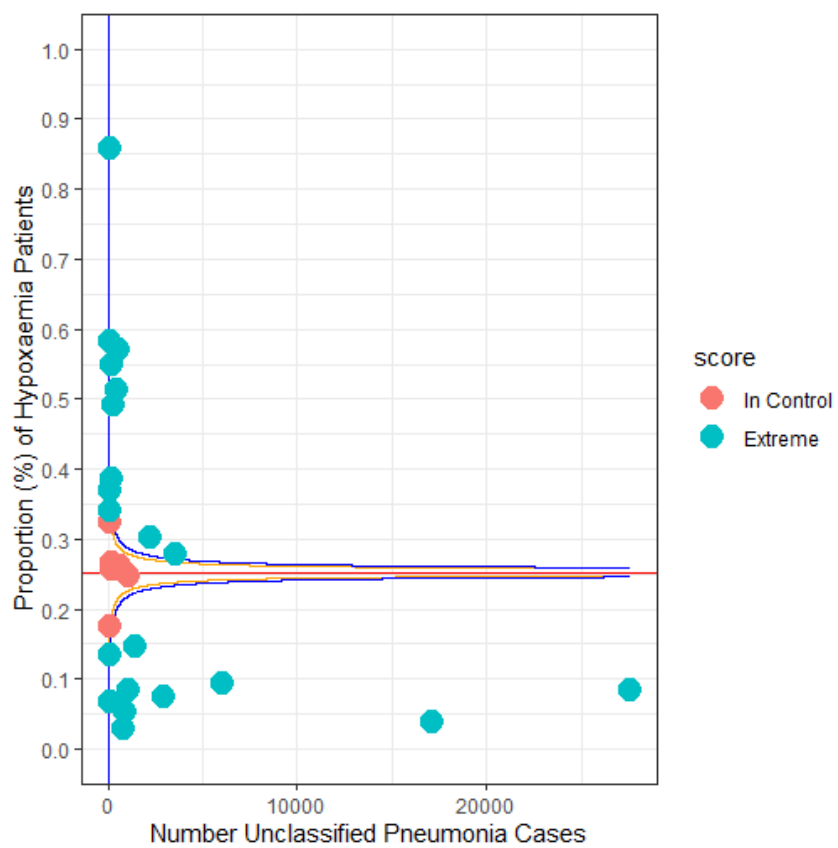

**Supplementary Figure 3: Hypoxaemia prevalence (presented in %) among children with WHO-classified pneumonia by type of patients**

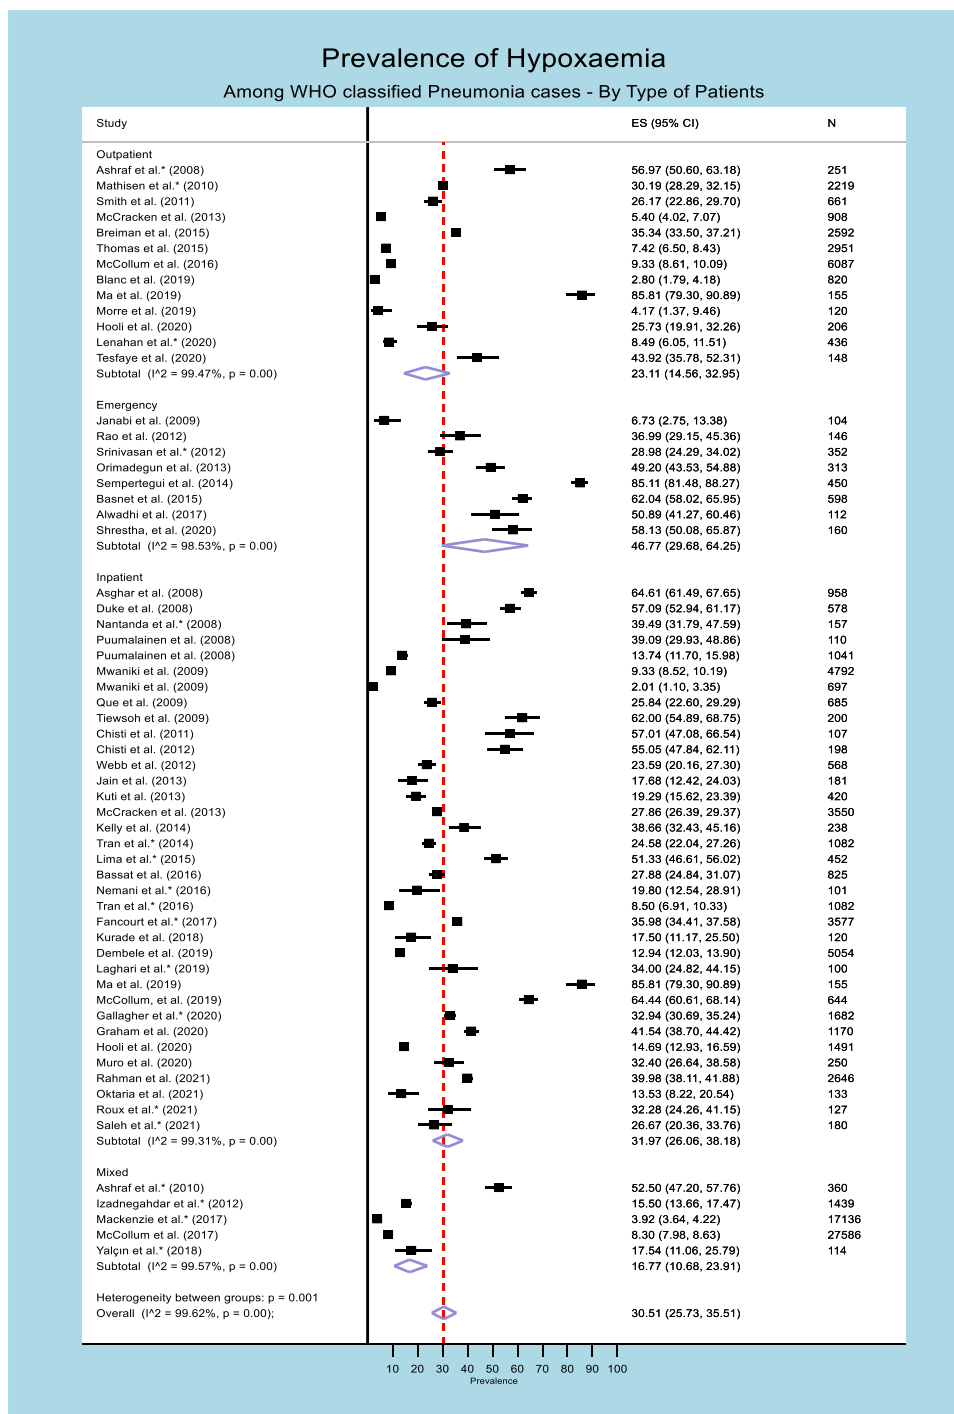

The broken red line shows the overall pooled prevalence of hypoxaemia.

\*Studies where SpO<sub>2</sub> cut-off is >90%

**Supplementary Figure 4: Hypoxaemia prevalence (presented in %) among WHO-classified pneumonia by region\***

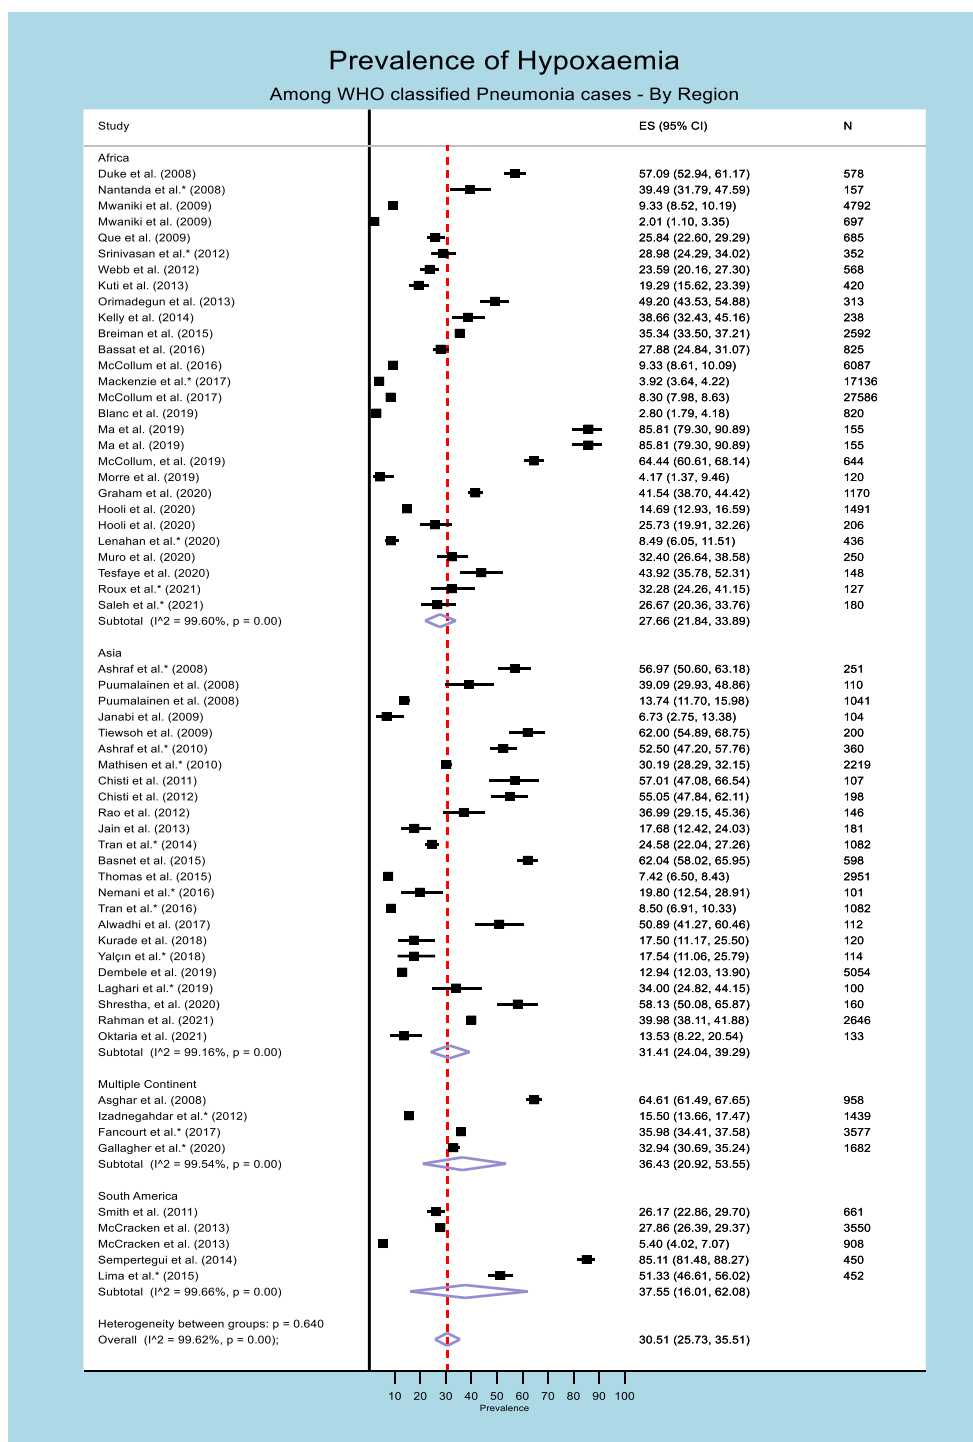

The broken red line shows the overall pooled estimate of prevalence of hypoxaemia.

\*Studies where SpO<sub>2</sub> cut-off is >90%

**Supplementary Figure 5: Hypoxaemia prevalence (presented in %) among WHO-classified pneumonia by publication year\***

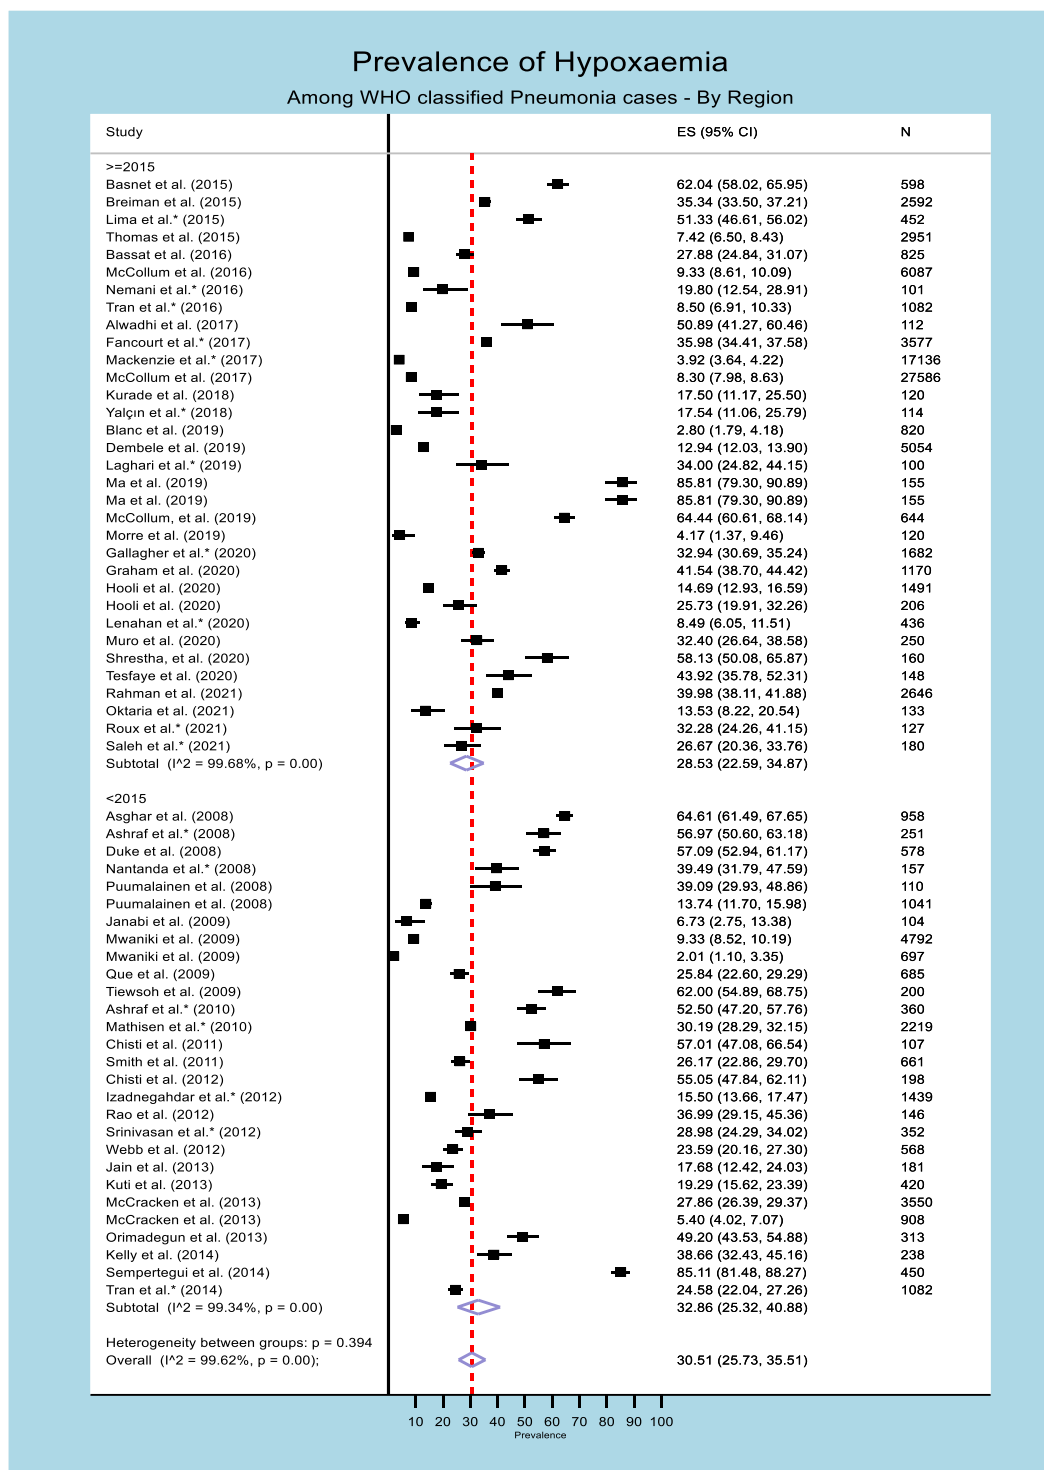

\*Studies where SpO<sub>2</sub> cut-off is >90%

Supplementary Figure 6: Hypoxaemia prevalence among WHO -classified pneumonia by Facility Type\*

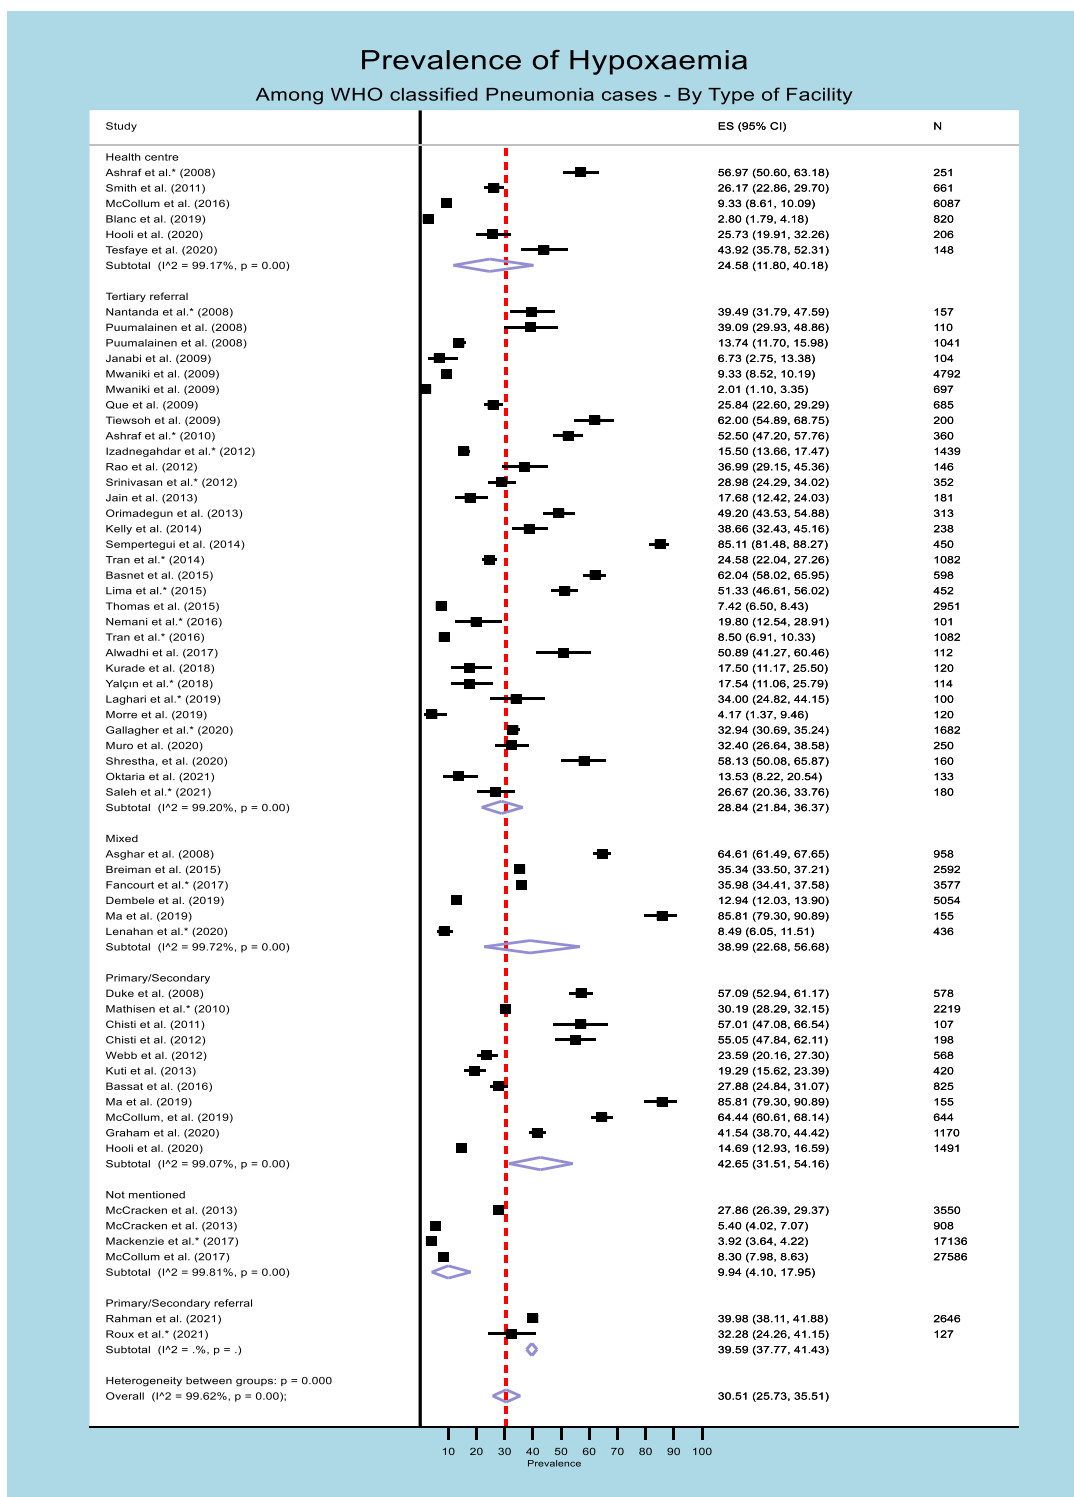

\*Studies where SpO2 cut-off is &gt;90%

## Supplementary Figure 7: Hypoxaemia prevalence among WHO-classified pneumonia by Patient Status\*

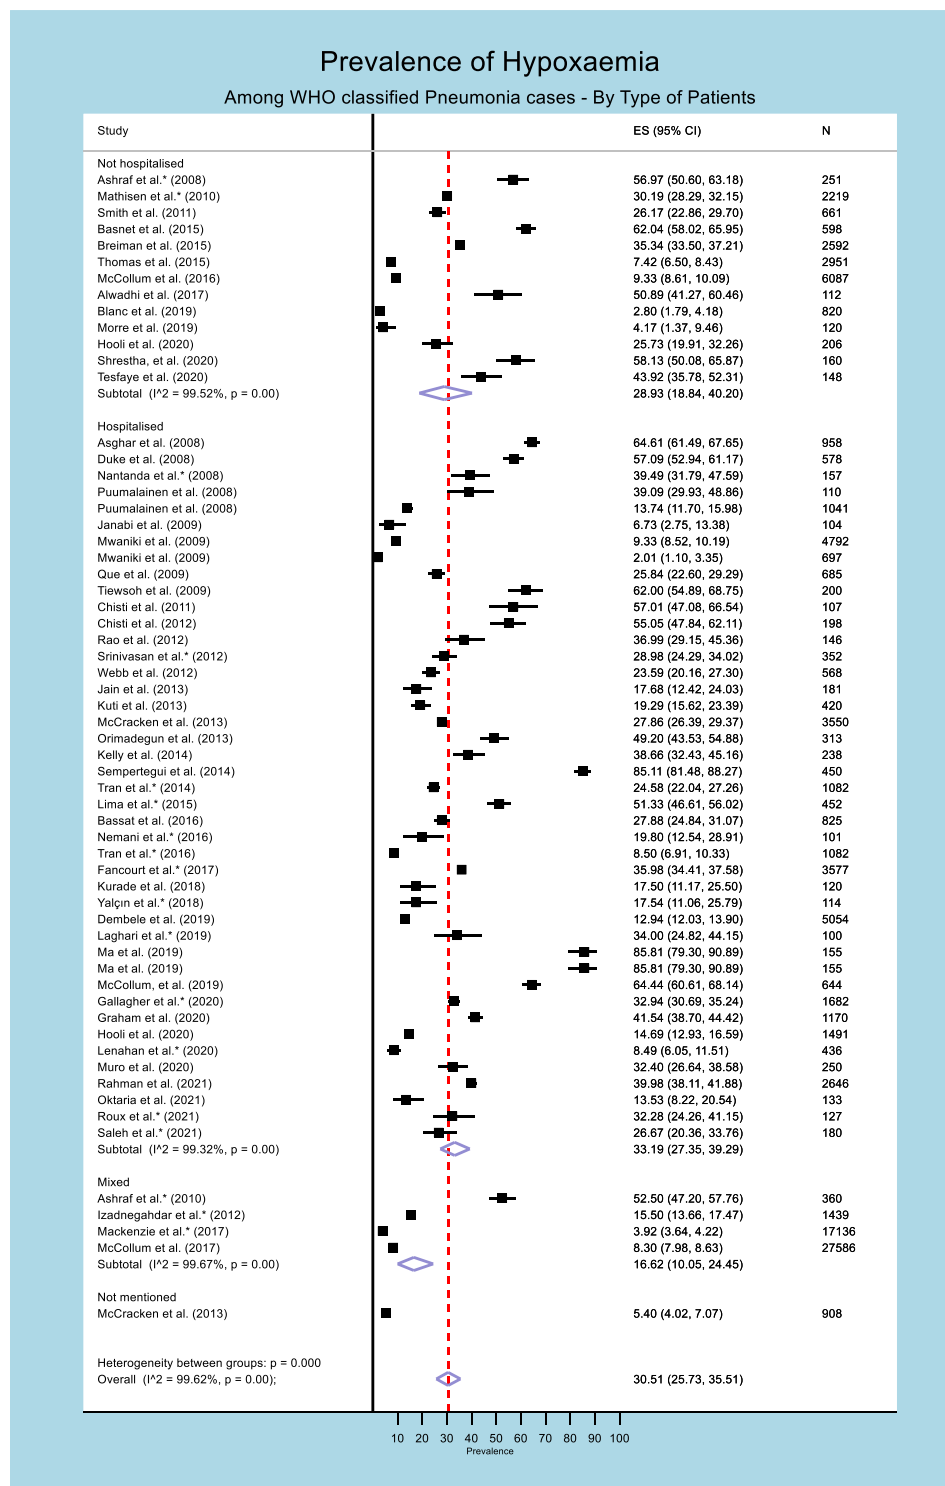

The broken red line shows the overall pooled prevalence of hypoxaemia.

\*Studies where SpO<sub>2</sub> cut-off is >90%

## Supplementary Material-1

### Key revisions in the IMCI guideline by WHO from versions 2008 to 2014

The previous IMCI guidelines (published in 2008) recommend that any child presenting with cough or difficult breathing should be assessed clinically for the presence of any danger sign, chest in-drawing, stridor, wheezing; and would be classified as one of the followings (**Error! Reference source not found.**):1. 'Severe Pneumonia/Very Severe Disease' ; 2. 'Pneumonia', 3. 'Cough or Cold'

The sensitivity of the previous definition of 'Severe Pneumonia/Very Severe Disease' was very high but it had issues with low specificity. This resulted in over referral of 'Severe Pneumonia/Very Severe Disease' cases to the hospital for inpatient care. As a results, it was imperative to reassess the validity of 'severe pneumonia' classification as outlined in the previous IMCI guidelines (2008). Prognostic value and treatment options for different signs of 'severe pneumonia' including chest in-drawing required a critical evaluation.

The new IMCI guidelines (2014) recommends that any child (2 months to 59 months) presenting with fast breathing or chest in-drawing (and no other danger signs) should be classified as 'Pneumonia', and would be treated through home-based management with oral antibiotics (amoxicillin for five days). In addition to other changes in the management to malnutrition, this was the most significant shift from the previous classification and treatment recommendation for pneumonia management. Previously, any child with chest indrawing would be classified as 'Severe Pneumonia', therefore would have been urgently referred to the hospital.

*An illustrative comparison of the 2008 and 2014 version of IMCI guidelines is presented in Figure 1.*

Figure 1: Difference in classification and treatment of children age 2-59 months presenting with cough or difficult breathing according to the IMCI guidelines (2008 vs. 2014) (adopted from the WHO evidence summary)

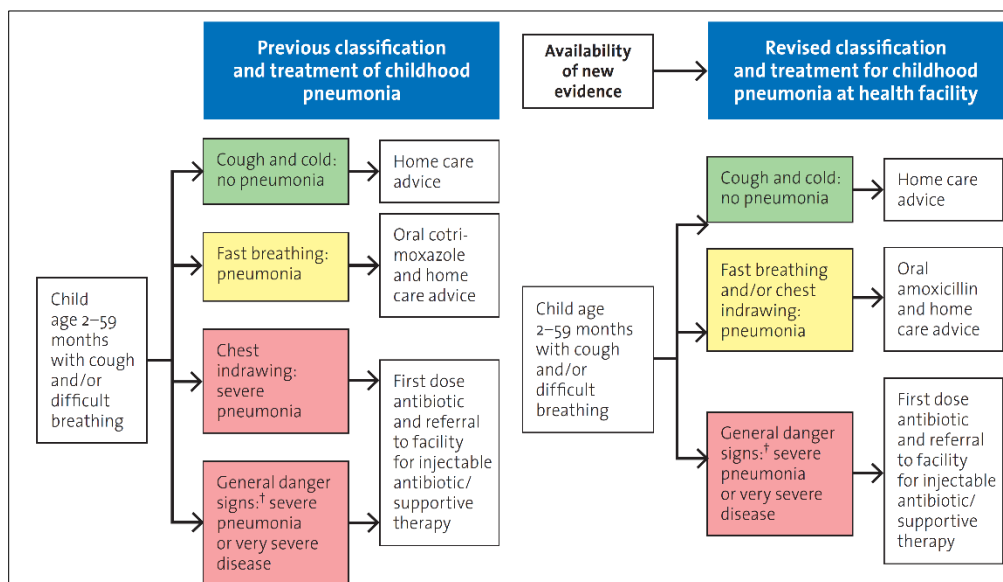

Supplement: mmc1.pdf [file mmc1.pdf]
